# Supplementary material
Source: publisher figshare collection journal article supplement (https://gsajournals.figshare.com/ndownloader/files/19068686)
Supplement: Supplementary file 1 [file 19068686]

## Sheet: Table S3
Table S3. Comparison of resident macrophages, day 0 vs all other days (DEXseq, MISO, Cuffdiff)
					DEXSeq												MISO – SE								MISO – RI								MISO – MXE								MISO – A5SS								MISO – A3SS
EnsemblID	EntrezGene ID	Associated Gene Name	Synonyms	Gene Biotype	Exon_Res_Day0-vs-3	log2FC_Res_Day0-vs-3	min(padj)_Res_Day0-vs-3	Exon_Res_Day0-vs-6	log2FC_Res_Day0-vs-6	min(padj)_Res_Day0-vs-6	Exon_Res_Day0-vs-9	log2FC_Res_Day0-vs-9	min(padj)_Res_Day0-vs-9	Exon_Res_Day0-vs-12	log2FC_Res_Day0-vs-12	min(padj)_Res_Day0-vs-12	SE_Res_Day0_all_vs_Res_Day3_all_diff	SE_Res_Day0_all_vs_Res_Day3_all_bayes_factor	SE_Res_Day0_all_vs_Res_Day6_all_diff	SE_Res_Day0_all_vs_Res_Day6_all_bayes_factor	SE_Res_Day0_all_vs_Res_Day9_all_diff	SE_Res_Day0_all_vs_Res_Day9_all_bayes_factor	SE_Res_Day0_all_vs_Res_Day12_all_diff	SE_Res_Day0_all_vs_Res_Day12_all_bayes_factor	RI_Res_Day0_all_vs_Res_Day3_all_diff	RI_Res_Day0_all_vs_Res_Day3_all_bayes_factor	RI_Res_Day0_all_vs_Res_Day6_all_diff	RI_Res_Day0_all_vs_Res_Day6_all_bayes_factor	RI_Res_Day0_all_vs_Res_Day9_all_diff	RI_Res_Day0_all_vs_Res_Day9_all_bayes_factor	RI_Res_Day0_all_vs_Res_Day12_all_diff	RI_Res_Day0_all_vs_Res_Day12_all_bayes_factor	MXE_Res_Day0_all_vs_Res_Day3_all_diff	MXE_Res_Day0_all_vs_Res_Day3_all_bayes_factor	MXE_Res_Day0_all_vs_Res_Day6_all_diff	MXE_Res_Day0_all_vs_Res_Day6_all_bayes_factor	MXE_Res_Day0_all_vs_Res_Day9_all_diff	MXE_Res_Day0_all_vs_Res_Day9_all_bayes_factor	MXE_Res_Day0_all_vs_Res_Day12_all_diff	MXE_Res_Day0_all_vs_Res_Day12_all_bayes_factor	A5SS_Res_Day0_all_vs_Res_Day3_all_diff	A5SS_Res_Day0_all_vs_Res_Day3_all_bayes_factor	A5SS_Res_Day0_all_vs_Res_Day6_all_diff	A5SS_Res_Day0_all_vs_Res_Day6_all_bayes_factor	A5SS_Res_Day0_all_vs_Res_Day9_all_diff	A5SS_Res_Day0_all_vs_Res_Day9_all_bayes_factor	A5SS_Res_Day0_all_vs_Res_Day12_all_diff	A5SS_Res_Day0_all_vs_Res_Day12_all_bayes_factor	A3SS_Res_Day0_all_vs_Res_Day3_all_diff
ENSMUSG00000000001	14679	Gnai3	AI158965, AW537698, Galphai3, Gnai-3	protein_coding	E009	0.147051	0.183078	E003	0.0338412	0.971619	E009	0.126753	0.194362	E008	0.0893261	0.666233
ENSMUSG00000000003	54192	Pbsn	PB, Prbs	protein_coding
ENSMUSG00000000028	12544	Cdc45	Cdc45l	protein_coding	E004	0.207843	0.741209	E015		0.529466	E003		0.853381	E003	-0.446717	0.762075					0.06	0.24	-0.02	0.11
ENSMUSG00000000031		H19		lincRNA
ENSMUSG00000000037	107815	Scml2	4932420G07Rik	protein_coding
ENSMUSG00000000049	11818	Apoh	B2GPI, beta-2-GPI, beta2-GPI	protein_coding
ENSMUSG00000000056	67608	Narf	4430402O11Rik	protein_coding	E003	-0.169586	0.636397	E003	-0.2726	0.525472	E003		0.833857	E007	0.277354	0.891077
ENSMUSG00000000058	12390	Cav2	AI447843	protein_coding	E004	0.107484	0.0281167	E004	0.0861189	0.907657	E003	0.0450837	0.887699	E007	-0.113997	0.822425
ENSMUSG00000000078	23849	Klf6	AI448727, BCD1, C86813, Copeb, CPBP, FM2, FM6, Ierepo1, Ierepo3, R75280, Zf9	protein_coding	E004	-0.0540008	8.2322e-05	E004	-0.0301609	0.617556	E001	0.0480192	0.907754	E003	0.0526719	0.725953
ENSMUSG00000000085	29871	Scmh1	AI315320, AI851618, Scml1, Scml3	protein_coding	E031	0.379269	0.464902	E019		0.899429	E017		0.732927	E019	0.237901	0.732465	0.03	0.22					0.06	0.27
ENSMUSG00000000088	12858	Cox5a	AA959768, CcOX	protein_coding	E001	-0.0340832	0.906133	E001	-0.0774141	0.756463	E001		0.98785	E002	0.00801647	0.999937
ENSMUSG00000000093	21385	Tbx2		protein_coding	E007		0.910475
ENSMUSG00000000094	21387	Tbx4	3930401C23	protein_coding
ENSMUSG00000000103	22768	Zfy2	Zfy-2	protein_coding
ENSMUSG00000000120	18053	Ngfr	LNGFR, p75, p75NGFR, p75NTR, Tnfrsf16	protein_coding
ENSMUSG00000000125	22415	Wnt3	Int-4, Wnt-3	protein_coding
ENSMUSG00000000126	216795	Wnt9a	Wnt14	protein_coding
ENSMUSG00000000127	14158	Fer	AV082135, C330004K01Rik, Fer, Fert	protein_coding	E007	0.324795	0.398573	E004		0.520894	E004		0.219551	E004	-0.231405	0.740045			-0.02	0.11	-0.02	0.11	-0.01	0.11
ENSMUSG00000000131	74204	Xpo6	2610005L19Rik, AI854665, AL022631, C230091E20Rik, mKIAA0370, R75304, Ranbp20	protein_coding	E047	-0.660018	0.0470229	E047	-0.659	0.170207	E006	-0.213964	0.231534	E047	-0.929146	0.0175641	0.02	0.06	0.02	0.05	0	0.05	0.03	0.14							0.03	0.1									0.14	57.52	0.12	11.53	0.16	3.45933e+08	0.18	1000000000000	0
ENSMUSG00000000134	209446	Tfe3	bHLHe33, F830016E06Rik, Tcfe3, Tfe-3	protein_coding	E024	-0.764068	0.287596	E007	-0.75824	0.30407	E035	-0.251734	0.904762	E035	-0.325643	0.755061							0.07	0.31	0.07	30.79																							0
ENSMUSG00000000142	12006	Axin2	Axi1, Axil, Conductin	protein_coding
ENSMUSG00000000148	231841	Baat1	AA881470, Baat1	protein_coding	E009	-0.404121	0.710555	E022	-0.132082	0.85269	E018		0.62646	E019	0.330105	0.885966									-0.06	0.27	-0.11	0.85	-0.08	0.37	-0.08	0.52
ENSMUSG00000000149	14673	Gna12	AI414047, AI504261, Galpha12	protein_coding	E004	0.0647923	0.898464	E002	0.147879	0.935566	E004	0.0859559	0.990471	E001	-0.0243204	0.638525
ENSMUSG00000000154	18400	Slc22a18	AW260131, BWR1A, BWSCR1A, HET, Impt1, ITM, Orctl2, p45-BWR1A, Slc22a1l, TSSC5	protein_coding	E007	0.223216	0.215833	E012		0.555691	E007		0.946364	E015	0.145914	0.923933							-0.05	0.21
ENSMUSG00000000157	16415	Itgb2l	5033406G21Rik, pactolus	protein_coding
ENSMUSG00000000159	72058	Igsf5	2010003D20Rik, Jam4, JCAM	protein_coding
ENSMUSG00000000167	72614	Pih1d2	2700059L22Rik	protein_coding																			-0.21	0.81
ENSMUSG00000000168	235339	Dlat	6332404G05Rik, DLTA, PDC-E2	protein_coding	E012	0.13676	0.527585	E003	0.0924195	0.942134	E003		0.318479	E004	0.0966505	0.770769
ENSMUSG00000000171	66925	Sdhd	3110001M13Rik, AVLL5809, C78570, PRO19626	protein_coding	E002	0.0729837	0.493616	E002	0.0661004	0.891147	E001	-0.0335973	0.90347	E002	0.0716737	0.87023
ENSMUSG00000000182	64654	Fgf23		protein_coding
ENSMUSG00000000183	14177	Fgf6	Fgf-6, HSTF-2	protein_coding
ENSMUSG00000000184	12444	Ccnd2	2600016F06Rik, AI256817, BF642806, C86853, cD2, Vin-1, Vin1	protein_coding	E003	0.0297995	0.764857	E003	-0.0240937	0.998227	E004	-0.0728292	0.870785	E004	-0.0439716	0.975828
ENSMUSG00000000194	277463	Gpr107	9930033D15Rik, AI790205, C530034M11, mKIAA1624	protein_coding	E023	0.166414	0.591931	E016	-0.200652	0.624335	E008	-0.280888	0.135357	E016	-0.169215	0.75083
ENSMUSG00000000197	338370	Nalcn	A530023G15Rik, AI849508, Vgcnl1	protein_coding
ENSMUSG00000000202	72014	Btbd17	1500005I02Rik, Tango10a	protein_coding
ENSMUSG00000000204	20558	Slfn4	AI450778	protein_coding	E009	0.186144	0.0486151	E008		0.932446	E008		0.935235	E006		0.89493
ENSMUSG00000000214	21823	Th		protein_coding
ENSMUSG00000000215	16334	Ins2	AA986540, Ins-2, InsII, Mody, Mody4, proinsulin	protein_coding
ENSMUSG00000000216	20278	Scnn1g	[g]ENaC	protein_coding
ENSMUSG00000000223	13497	Drp2	AW495265, DRP-2	protein_coding
ENSMUSG00000000244	27027	Tspan32	Art-1, AW208513, BB235973, D7Wsu37e, Phemx, Tssc6	protein_coding	E010	0.174345	0.18068	E017	0.553058	0.5968	E017		0.360908	E017	0.790861	0.21386	0	0	0.08	0.4	0	0	-0.01	0.03															-0.18	137.07
ENSMUSG00000000247	16870	Lhx2	ap, apterous, Lh-2, LH2A, Lim2	protein_coding	E012		0.735495
ENSMUSG00000000248	70809	Clec2g	4632413B12Rik, Clr-c, Clrc, Clrd, Clrx, Ddv10, Ocilrp1	protein_coding
ENSMUSG00000000253	66355	Gmpr	2310004P21Rik, AV028449	protein_coding	E009	-0.100132	0.728963	E009	-0.0796875	0.88943	E009	-0.0762714	0.809075	E009	-0.0804587	0.79916
ENSMUSG00000000263	14654	Glra1	B230397M16Rik, nmf11, oscillator, ot, spasmodic, spd	protein_coding
ENSMUSG00000000266	23947	Mid2	FXY2, Trim1	protein_coding
ENSMUSG00000000275	217069	Trim25	AA960166, AL022677, EFP, Zfp147	protein_coding	E003	0.0331351	0.642566	E001	-0.0500911	0.830938	E009	0.0424775	0.976205	E001	-0.0431396	0.920175	0	0	0	0.02	0	0.03	0.01	0.06									0	0	0.01	0.09	0	0	0.03	1.63
ENSMUSG00000000276	56077	Dgke	C87606, DAGK6, DGK	protein_coding	E002	-0.213291	0.40126	E003		0.95495	E014		0.792117	E010	-0.429773	0.822912
ENSMUSG00000000278	74617	Scpep1	2410018F01Rik, 4833411K15Rik, AI957256, Risc	protein_coding	E004	-0.103477	0.108479	E011	0.0970223	0.554443	E002	0.104529	0.166426	E011	0.0475764	0.93724	0	0	0	0	0.01	0	0	0
ENSMUSG00000000282	17428	Mnt	bHLHd3, Rox	protein_coding	E009	0.100474	0.580434	E007	-0.0688146	0.935231	E009		0.707545	E009	0.0750135	0.8141
ENSMUSG00000000290	16414	Itgb2	2E6, AI528527, Cd18, LAD, LCAMB, Lfa1, MF17	protein_coding	E007	0.0334655	0.189929	E011	0.0161374	0.349848	E017	-0.0180656	0.266313	E007	0.0299084	0.463649	0	0	0	0	-0.01	0.18	-0.01	0.36																			0.01	0	0.01	0
ENSMUSG00000000295	69692	Hddc2	2310057G13Rik	protein_coding	E014		0.903814	E007		0.986624	E014		0.864881	E007		0.992151
ENSMUSG00000000296	21987	Tpd52l1	D53	protein_coding
ENSMUSG00000000301	18618	Pemt	AI255394, Pempt, Pempt2	protein_coding	E006		0.119677
ENSMUSG00000000303	12550	Cdh1	AA960649, E-cad, Ecad, L-CAM, Um, UVO	protein_coding	E019	0.166877	0.326777	E013	0.18448	0.555067	E017		0.688843	E006	-0.147475	0.900909
ENSMUSG00000000305	12561	Cdh4	AW120700, R-Cadh, R-cadherin, Rcad	protein_coding
ENSMUSG00000000308	12716	Ckmt1	mi-CK, Mt-CK, ScCKmit, UbCKmit	protein_coding
ENSMUSG00000000317	12029	Bcl6b	Bazf	protein_coding
ENSMUSG00000000318	17312	Clec10a	CD301a, M-ASGP-BP-1, Mgl, Mgl1	protein_coding	E026		0.714898
ENSMUSG00000000320	11684	Alox12	9930022G08Rik, Alox12p, P-12LO	protein_coding
ENSMUSG00000000325	11877	Arvcf		protein_coding	E028		0.591004	E037		0.876652	E010		0.93517	E039		0.988252
ENSMUSG00000000326	12846	Comt	Comt1, D16Wsu103e, D330014B15Rik	protein_coding	E011	0.251516	0.570978	E011	0.170449	0.947338	E004	-0.0310494	0.861179	E011	0.246418	0.763021	0.08	1.13			0.1	17.49
ENSMUSG00000000339	66368	Rtcd1	2310009A18Rik, AI450277, RPC, Rtcd1	protein_coding	E004	0.399197	0.3837	E004		0.78429	E006		0.842451	E005		0.878169
ENSMUSG00000000340	13171	Dbt	D3Wsu60e	protein_coding	E001	0.519727	0.246857	E006		0.681631	E002		0.469541	E001	0.518891	0.705414
ENSMUSG00000000346	23994; 100039826	Dazap2	AI314727, Brbp, Gcap28, gt6-12, mKIAA0058, Prtb	protein_coding	E003	0.0479284	0.683333	E001	-0.0566314	0.879519	E002	-0.0130082	0.999975	E003	0.0405434	0.629097
ENSMUSG00000000355	68995	Mcts1	1500019M23Rik, MCT-1	protein_coding	E007	-0.605237	0.101639	E010	0.363359	0.929623	E002		0.93543	E005	-0.0941678	0.951945					0	0	0	0
ENSMUSG00000000359	19700	Rem1	E030011C07Rik, Rem	protein_coding	E002		0.624119	E007		0.952507	E007		0.691787	E007		0.693928
ENSMUSG00000000365	30054	Rnf17	MMIP-2, Mmip2, TDRD4	protein_coding	E005		0.596543
ENSMUSG00000000374	216131	Trappc10	B230307C21Rik, Gm870, Tmem1	protein_coding	E006	0.139698	0.636515	E023	0.380972	0.243824	E008	0.143105	0.695556	E012	-0.130813	0.803093
ENSMUSG00000000378	216527	Ccm2	BC029157	protein_coding	E023	0.128384	0.237417	E023	0.112299	0.717225	E023	0.162892	0.0553773	E023	0.108086	0.445872	0.02	0.08	0.01	0.05	0	0	0.01	0.07
ENSMUSG00000000381	22373	Wap		protein_coding
ENSMUSG00000000384	21379	Tbrg4	2310042P22Rik, AA120735, AA408001, AI527316, Cpr2, mKIAA0948, R74877, Tb-12	protein_coding	ENSMUSG00000000384+ENSMUSG00000065686:E027	-1.08233	0.207736	ENSMUSG00000000384+ENSMUSG00000065686:E012	0.306789	0.382355	ENSMUSG00000000384+ENSMUSG00000065686:E010		0.502154	ENSMUSG00000000384+ENSMUSG00000065686:E029	0.31002	0.469342
ENSMUSG00000000385	50528	Tmprss2	D16Ertd61e	protein_coding
ENSMUSG00000000386		Mx1		protein_coding	E019		0.472711	E017		0.919194	E002		0.999975	E002		0.999937	-0.57	18.19	-0.51	3.09	-0.49	2.84	-0.41	1.58
ENSMUSG00000000392	14089	Fap		protein_coding
ENSMUSG00000000394	14526	Gcg	GLP-1, Glu, PPG	protein_coding
ENSMUSG00000000399	66108	Ndufa9	1010001N11Rik	protein_coding	E007	0.0953032	0.556946	E004	-0.117996	0.436557	E004	-0.0952534	0.67667	E007	0.123584	0.64065
ENSMUSG00000000402	54156	Egfl6	Maeg	protein_coding
ENSMUSG00000000409	16818	Lck	Hck-3, Lsk, Lskt, p56<lck>, p56Lck	protein_coding	E005		0.725727
ENSMUSG00000000411	58864	Tssk3	1700014N07Rik, 4930594I21Rik, Stk22c, Stk22d, Tsk-3, Tssk-3, Tssk3b	protein_coding
ENSMUSG00000000416	30785	Cttnbp2	3010022N24Rik, 4732477G22Rik, 6430526E05, 9130022E09Rik, AU040881, Cortbp2, mKIAA1758, ORF4	protein_coding
ENSMUSG00000000420	14423	Galnt1		protein_coding	E006	-0.778737	0.00113028	E006	-0.321512	0.831504	E007	-0.333701	0.449778	E007	-0.432228	0.638525	0.01	0.04	0	0.03	0.01	0.03	0.01	0.05
ENSMUSG00000000435	17877	Myf5	B130010J22Rik, bHLHc2, Myf-5	protein_coding
ENSMUSG00000000439	67027	Mkrn2	2610002L04Rik, C81377	protein_coding	E007	0.150162	0.722823	E003		0.999564	E007		0.990471	E003		0.863227
ENSMUSG00000000440	19016	Pparg	Nr1c3, PPAR-gamma, PPAR-gamma2, PPARgamma, PPARgamma2	protein_coding	E002	-0.284142	0.0135008	E002	-0.289121	0.00904316	E001	-0.272978	0.372269	E001	-0.193031	0.686867
ENSMUSG00000000441	110157	Raf1	6430402F14Rik, AA990557, BB129353, c-Raf, Craf1, D830050J10Rik, Raf-1, v-Raf	protein_coding	E008	0.577029	0.237527	E026	0.201019	0.38646	E026	0.218	0.506112	E025	0.0670876	0.85183	0	0	-0.01	0	0.01	0	0	0
ENSMUSG00000000486	54204	Sept1	Diff6, Pnutl3	protein_coding	E005		0.436209
ENSMUSG00000000489	18591	Pdgfb	PDGF-B, Sis	protein_coding	E007		0.533259	E002		0.943127	E001		0.986784	E003		0.900909
ENSMUSG00000000530	11482	Acvrl1	Acvrlk1, AI115505, AI427544, Alk1	protein_coding	E019	0.164602	0.580281	E026	0.162979	0.731124	E021	0.095628	0.928848	E021	0.0775957	0.947681																							-0.13	0.51									-0.19
ENSMUSG00000000531	56149	Grasp	tamalin	protein_coding
ENSMUSG00000000532	11479	Acvr1b	6820432J04, ActR-IB, ActRIB, Acvrlk4, Alk4, SKR2	protein_coding	E009	-0.015873	0.535701	E002	-0.120755	0.393857	E002	-0.0446673	0.907552	E002	-0.148678	0.409458
ENSMUSG00000000538	216810	Tom1l2	2900016I08Rik, A730055F12Rik, AU042072, Srebf1	protein_coding	E025	0.238303	0.253619	E023	-0.184594	0.836704	E024		0.775765	E028	-0.234804	0.883671	0.03	0.1	0.01	0.04	0.01	0.05	0	0.03	0.08	0.28	0.02	0.18	0.07	0.27	0.05	0.19	-0.24	52.8
ENSMUSG00000000544	59290	Gpa33	2010310L10Rik, 2210401D16Rik, BB116197	protein_coding
ENSMUSG00000000552	29813	Zfp385a	Hzf, Zfp385, Znf385a	protein_coding	E006	0.0743176	0.565688	E001	-0.0810138	0.721581	E003	0.0325432	0.973136	E008	0.185663	0.720335
ENSMUSG00000000555	16402	Itga5	Cd49e, Fnra, VLA5	protein_coding	E002	-0.0836396	0.366618	E002	-0.0573005	0.879925	E027	-0.134078	0.553315	E008	0.0937463	0.767498					0.01	0.03	0.01	0.03																	0	0	-0.01	0	-0.01	0	0	0
ENSMUSG00000000560	14395	Gabra2	C630048P16Rik, Gabra-2	protein_coding
ENSMUSG00000000561	70465	Wdr77	2610003I18Rik, 2610312E17Rik, C79984, p44/MEP50	protein_coding	ENSMUSG00000000561+ENSMUSG00000074340:E023	-0.166576	0.174604	ENSMUSG00000000561+ENSMUSG00000074340:E022	-0.237899	0.181967	ENSMUSG00000000561+ENSMUSG00000074340:E019		0.724525	ENSMUSG00000000561+ENSMUSG00000074340:E013	-0.147986	0.863452															0.07	0.41															0.05	0.21
ENSMUSG00000000562	11542	Adora3	1700001D09Rik, 4930578J19Rik, A3AR, A3R, AA3R, ARA3, Gpcr2	protein_coding	ENSMUSG00000074344+ENSMUSG00000000562:E003		0.902436	ENSMUSG00000074344+ENSMUSG00000000562:E004		0.879907	ENSMUSG00000074344+ENSMUSG00000000562:E004		0.965721	ENSMUSG00000074344+ENSMUSG00000000562:E004		0.908313
ENSMUSG00000000563	11950	Atp5f1	C76477	protein_coding	E001	-1.11798	0.149029	E015	-0.129306	0.939328	E014	0.0756583	0.687082	E006	-0.351013	0.755365	0.01	0	0.01	0	0.01	0
ENSMUSG00000000567	20682	Sox9	2010306G03Rik, AV220920, mKIAA4243	protein_coding
ENSMUSG00000000568	11991	Hnrnpd	Auf1, Hnrpd	protein_coding	E005	-0.433223	0.00927322	E008	0.741591	0.357963	E001	0.23375	0.716068	E008	0.494791	0.514067	0	0	0.17	417.45	0	0	0	0
ENSMUSG00000000579	21648; 100040531; 100040563; 100310872	Dynlt1c	AGS2, Dynlt1, Tctex-1, Tctex1	protein_coding	E011		0.000213424	E011		0.187982	E005		0.999975	E005		0.999937
ENSMUSG00000000581	57316	C1d	1110036E10Rik, AI875855, SUN-CoR	protein_coding	E014	-0.198275	0.117777	E007	0.114344	0.891023	E014		0.293213	E008	0.110067	0.822375
ENSMUSG00000000594	14667	Gm2a	AA408702, AW215435, GM2-AP, SAP-3	protein_coding	E001	0.0774285	0.577244	E001	0.0777893	0.740341	E003	-0.0218554	0.614759	E001	0.0429203	0.989323
ENSMUSG00000000600	79264	Krit1	2010007K12Rik, A630036P20Rik, AA432855, AI450393, AI643869, BB155247, BB235701, Ccm1	protein_coding	E003	0.296617	0.440226	E001	0.249954	0.794717	E016		0.853381	E010	-0.163037	0.864175	0.06	0.46	0	0.04
ENSMUSG00000000605	12727	Clcn4-2	Clc4-2, Clcn4	protein_coding	E011	-0.201535	0.173209	E008	-0.116307	0.828406	E012	0.156015	0.551022	E002	-0.0845339	0.802244			-0.06	0.72					0.1	241.84
ENSMUSG00000000606	669149	Vmn2r88	V2r13, V2r3	protein_coding
ENSMUSG00000000617	108072	Grm6	BC021919, Gm3, Gprc1f, mGluR6, nerg1, nob2, nob3, nob4	protein_coding
ENSMUSG00000000627	20355	Sema4f		protein_coding
ENSMUSG00000000628	15277	Hk2	AI642394, HKII	protein_coding	E005	-0.0923956	0.325722	E008	-0.122903	0.915393	E013	0.227655	0.538098	E021	0.127772	0.861809
ENSMUSG00000000631	360013	Myo18a	MyoPDZ, MysPDZ	protein_coding	E074	-0.236659	0.327828	E067	0.276378	0.572322	E056	-0.349672	0.283988	E056	-0.360823	0.345705			0.2	0.57	0.19	0.76	0.2	0.64
ENSMUSG00000000632	20370	Sez6	BSRP-C, D11Bhm177e, mKIAA4158, sez-6	protein_coding
ENSMUSG00000000673	107766	Haao	0610007K21Rik, 0610012J07Rik, 3-HAO, 3-HAOxase, 3HAO	protein_coding	E006		0.761664	E002		0.893291	E007		0.977601	E002		0.729858
ENSMUSG00000000682	23833	Cd52	AI463198, B7, B7-Ag, CAMPATH-1, CLS1, MB7	protein_coding	E002	0.0447842	0.0857174	E002	0.0198079	0.721572	E002	0.0609385	0.608096	E002	0.0111654	0.973582
ENSMUSG00000000686	67477	Abhd15	1300007F04Rik	protein_coding	E005		0.989433	E005		0.999675	E005		0.984076	E005		0.999937
ENSMUSG00000000690	15414	Hoxb6	Hox-2.2	protein_coding
ENSMUSG00000000693	16950	Loxl3	Lor2, Loxl2	protein_coding	E019		0.98354
ENSMUSG00000000701	27382	Tcl1b5	D12Ertd644e	protein_coding
ENSMUSG00000000706	12231	Btn1a1	Btn	protein_coding
ENSMUSG00000000708	18519	Kat2b	A930006P13Rik, AI461839, AW536563, p/CAF, Pcaf	protein_coding	E018	-1.04367	0.380422	E007	0.630213	0.275367	E007		0.307577	E007	0.469559	0.475988							-0.01	0.31
ENSMUSG00000000711	19344	Rab5b	C030027M18Rik	protein_coding	E003	-0.114208	0.741211	E005	0.0457245	0.972784	E006	0.0986181	0.740176	E001	-0.0216047	0.985001
ENSMUSG00000000724	12957	Cryba1	BA3/A1, Cryb	protein_coding
ENSMUSG00000000730	54427	Dnmt3l	D6Ertd14e, ecat7	protein_coding	E021		0.869194	E023		0.904153
ENSMUSG00000000731	11634	Aire		protein_coding
ENSMUSG00000000732	50723	Icosl	AU044799, B7-H2, B7h, B7RP-1, BG071784, GI50, GL50, GL50-B, ICOS-L, Icoslg, LICOS, Ly115l, mKIAA0653	protein_coding	E006	0.150103	0.504933	E006	0.144917	0.890027	E001		0.669209	E006	0.157184	0.779593
ENSMUSG00000000738	234847	Spg7	AI452278, AU015315, Cmar, PGN	protein_coding	E041	6.08564	0.273603	E026	-0.219507	0.319272	E027	-0.190656	0.671662	E026	-0.160014	0.64071	0.04	0.44	0.03	1.51	-0.02	0.1	0.02	0.44	0.1	0.81																							0
ENSMUSG00000000739	57429	Sult5a1	Sult-x1, Sultx1	protein_coding
ENSMUSG00000000740	270106; 100040416	Rpl13	A52, L13	protein_coding	ENSMUSG00000000740+ENSMUSG00000064450:E003		0.190644	ENSMUSG00000000740+ENSMUSG00000064450:E006		0.562314	ENSMUSG00000000740+ENSMUSG00000064450:E013		0.698288	ENSMUSG00000000740+ENSMUSG00000064450:E013		0.827153									0.16	11.69	0.19	62.14			0.04	0.12
ENSMUSG00000000743	234852	Chmp1a	2900018H07Rik, Pcoln3	protein_coding	E009	-0.59483	0.0364475	E009	0.219163	0.893291	E003	-0.0794904	0.489681	E008	-0.375158	0.878745
ENSMUSG00000000751	68275	Rpa1	5031405K23Rik, 70kDa, AA589576, AW557552, RF-A, RP-A, Rpa	protein_coding	E017	0.290719	0.111058	E023	-0.225236	0.548718	E011	-0.143671	0.303196	E017	0.197448	0.765443
ENSMUSG00000000753	20317	Serpinf1	AI195227, EPC-1, Pedf, Pedfl, Sdf3	protein_coding
ENSMUSG00000000759	259279	Tubgcp3	GCP3, Spc98p	protein_coding	E015	-0.332719	0.0236596	E008	0.18281	0.795311	E020		0.430946	E020	0.473198	0.727149									0.17	204.86
ENSMUSG00000000766	18390	Oprm1	M-OR-1, MOP-R, mor, MOR-1, MOR-1O, muOR, Oprm	protein_coding
ENSMUSG00000000776	67065	Polr3d	2810426M17Rik, 44kDa, AI326118, AW489084, BN51T, RPC4, TSBN51	protein_coding	E003	0.144587	0.655198	E007		0.78429	E008		0.962937	E003		0.881474
ENSMUSG00000000782	21414	Tcf7	AI465550, TCF-1, Tcf1	protein_coding
ENSMUSG00000000787	13205	Ddx3x	D1Pas1-rs2, Ddx3, Fin14	protein_coding	E029	-0.178277	0.147768	E011	0.0586206	0.602444	E019	0.0453049	0.498727	E014	0.0605458	0.818196																																	-0.06
ENSMUSG00000000791	16161	Il12rb1	CD212, IL-12R[b]	protein_coding	E010		0.851645
ENSMUSG00000000792	114479	Slc5a5	NIS	protein_coding
ENSMUSG00000000794	140493	Kcnn3	KCa2.3, SK3, SKCA3	protein_coding	E005	-0.152913	0.547634	E001	-0.0249449	0.940271	E001	0.0558683	0.331476	E004	-0.0523201	0.940238
ENSMUSG00000000804	237898	Usp32	2900074J03Rik, 6430526O11Rik, AW045245	protein_coding	E016	0.145845	0.525995	E036	0.364221	0.327937	E011	0.154121	0.662052	E036	0.358457	0.412625	0.03	0.1	0.01	0.07	0	0.04	0	0.06
ENSMUSG00000000805	12351	Car4	AW456718, Ca4	protein_coding	E003	-0.292052	0.649852	E011	-0.0185155	0.955771	E019	0.0187272	0.913575	E006	-0.388031	0.949039																																	0
ENSMUSG00000000811		Txnrd3	AI196535, Tgr, TR2	protein_coding	E005		0.457139	E012		0.87893	E016		0.999975	E009		0.999937
ENSMUSG00000000817	14103	Fasl	APT1LG1, CD178, CD95-L, CD95L, Fas-L, Faslg, gld, Tnfsf6	protein_coding
ENSMUSG00000000823	269401	Znf512b	Gm632	protein_coding	ENSMUSG00000089917+ENSMUSG00000000823:E026	-0.414371	0.0108167	ENSMUSG00000089917+ENSMUSG00000000823:E054	0.113428	0.396309	ENSMUSG00000089917+ENSMUSG00000000823:E054	0.156369	0.300692	ENSMUSG00000089917+ENSMUSG00000000823:E087	0.492336	0.21386																																	0.31
ENSMUSG00000000826	13002	Dnajc5	2610314I24Rik, AU018536, Csp	protein_coding	E020	-0.0809328	0.0315304	E011	0.0727248	0.831974	E017	-0.161189	0.243378	E017	-0.100758	0.666233
ENSMUSG00000000827	66314	Tpd52l2	2810411G23Rik, AU016537, C86069, D54	protein_coding	ENSMUSG00000088378+ENSMUSG00000000827:E005	0.826317	0.720343	ENSMUSG00000088378+ENSMUSG00000000827:E023	-0.514007	0.715385	ENSMUSG00000088378+ENSMUSG00000000827:E009	0.138046	0.879827	ENSMUSG00000088378+ENSMUSG00000000827:E029	-0.0581108	0.957482	-0.08	0.45	0.01	0	-0.14	2.47	0.01	0
ENSMUSG00000000838	14265	Fmr1	Fmr-1, FMRP	protein_coding	E035	-0.280695	1.63222e-08	E029	0.119268	0.840505	E029		0.822744	E035	-0.225627	0.0261968	0	0.03	0.01	0.03	0	0.03	0	0.03
ENSMUSG00000000861	14025	Bcl11a	2810047E18Rik, BCL-11A, Ctip1, D930021L15Rik, Evi9, Evi9a, Evi9b, Evi9c, mKIAA1809	protein_coding
ENSMUSG00000000869	16189	Il4	BSF-1, Il-4	protein_coding
ENSMUSG00000000876	59038	Pxmp4	3010018P03Rik, Pmp24	protein_coding	E006	0.529399	0.83461	E003	0.0897991	0.991607	E001		0.986104	E004	0.0762437	0.973582
ENSMUSG00000000881	53310	Dlg3	Dlgh3, mKIAA1232, SAP102	protein_coding	E032		0.999525
ENSMUSG00000000884	13972	Gnb1l	ESTM55, Gm16314, Me49f07, OTTMUSG00000033458, Wdr14, Wdvcf	protein_coding	ENSMUSG00000086965+ENSMUSG00000000884:E029		0.784002	ENSMUSG00000086965+ENSMUSG00000000884:E016		0.978542	ENSMUSG00000086965+ENSMUSG00000000884:E011		0.427168	ENSMUSG00000086965+ENSMUSG00000000884:E011		0.903404	0.18	0.5	0.11	0.56	0.15	0.58	0.17	0.76																									-0.09
ENSMUSG00000000889	13166	Dbh		protein_coding
ENSMUSG00000000901	17385	Mmp11	ST3, Stmy3	protein_coding
ENSMUSG00000000902	20587	Smarcb1	AU020204, Baf47, Ini1, Snf5, SNF5/INI1	protein_coding	E022	-0.137925	0.191662	E013	-0.112031	0.521547	E022	-0.070555	0.904762	E022	-0.127695	0.476872
ENSMUSG00000000903	22364	Vpreb3	8HS-20, AI528709, Vpreb-3	protein_coding
ENSMUSG00000000915	29816	Hip1r	AA410023, mKIAA0655	protein_coding	E008	0.400641	0.323756	E014	-0.293583	0.81275	E011		0.292002	E012	-0.265152	0.763021
ENSMUSG00000000916	100609	Nsun5	9830109N13Rik, AI326939, Nol1r, Wbscr20, Wbscr20a	protein_coding	E012		0.364461	E008		0.75065	E008		0.205871	E023		0.829337																									0.12	0.65
ENSMUSG00000000934	72960	Top1mt	2900052H09Rik	protein_coding	E012		0.647404	E002		0.884885	E011		0.89154	E005		0.923933
ENSMUSG00000000938	15395	Hoxa10	Hox-1.8, Hoxa-10	protein_coding
ENSMUSG00000000942	15401	Hoxa4	AV206827, Hox-1.4	protein_coding
ENSMUSG00000000948	20646	Snrpn	2410045I01Rik, HCERN3, Peg4, Pwcr1, SMN	protein_coding
ENSMUSG00000000957	17387	Mmp14	AI325305, MT-MMP-1, MT1-MMP, sabe	protein_coding	E001	-0.487921	0.506899	E001	-0.580864	0.563042	E006		0.888225	E001	-0.522339	0.715911
ENSMUSG00000000958	20540	Slc7a7	AI790233, my+lat1	protein_coding	E009	0.0784386	0.468593	E005	-0.0393168	0.989432	E009		0.756843	E005	-0.146861	0.457039
ENSMUSG00000000959	69089	Oxa1l	1810020M02Rik, AI894287	protein_coding	E006	0.0909419	0.55598	E001	-0.252583	0.285726	E001	-0.114079	0.926418	E006	0.12534	0.346055
ENSMUSG00000000976	217026	Heatr6	2700008B19Rik, BB135312, BB249351	protein_coding	E027	-0.186481	0.52065	E023	0.158051	0.909962	E027		0.684377	E027	-0.229984	0.791349																																	0.16
ENSMUSG00000000982	20302	Ccl3	AI323804, G0S19-1, LD78alpha, MIP-1alpha, MIP1-(a), MIP1-alpha, Mip1a, Scya3	protein_coding	E003	-0.121481	0.0523977	E001		0.719982	E003		0.999975	E001		0.925642
ENSMUSG00000000983	14038	Wfdc18	Expi, Kal1, WDNM1	protein_coding	E008		0.955706
ENSMUSG00000001014	78369	Icam4	1810015M19Rik, Cd242, ICAM-4	protein_coding
ENSMUSG00000001016	67781	Ilf2	6230405A16Rik, TEG-267, Tex261, Tex267	protein_coding	E005	0.20252	0.153884	E005	0.230443	0.299437	E014		0.890328	E014	0.190259	0.404655
ENSMUSG00000001017	66511	Chtop	2500003M10Rik, C81330, Fop, Srag	protein_coding	E013	-0.219848	0.0637302	E005	-0.0801961	0.393437	E006	-0.208336	0.839307	E006	-0.328214	0.281715	0.1	0.92	0.2	679.49	0.06	0.22	0.03	0.13					0.06	0.27	-0.03	0.31																	-0.08
ENSMUSG00000001018	20615	Snapin	25kDa, AA407989, AV026596, Bloc1s7, Snap25bp, Snapap	protein_coding	E005	0.0373118	0.777138	E004	0.0328672	0.978542	E008		0.911319	E007	-0.218899	0.952955					0.04	0.32																			0.09	3.88	0.06	0.42	0.12	88.81	0	0.03
ENSMUSG00000001020	20198	S100a4	18A2, 42a, Capl, FSp1, metastasin, Mts1, PeL98, pk9a	protein_coding	E007		0.830612	E007		0.727617	E006		0.996509	E002	-0.141189	0.991369
ENSMUSG00000001021	20197	S100a3	S100E	protein_coding
ENSMUSG00000001023	20199	S100a5	S100D9	protein_coding
ENSMUSG00000001025	20200	S100a6	2A9, 5B10, Cacy, CALCYCLIN, PRA	protein_coding	E001		0.914921	E001		0.927686	E002		0.999975	E002		0.999937
ENSMUSG00000001027	110880	Scn4a	mH2, Nav1.4, SkM1	protein_coding
ENSMUSG00000001029	15896	Icam2	CD102, Icam-2, Ly-60	protein_coding	E010		0.643736	E010		0.999675				E001		0.760459							0.07	0.41
ENSMUSG00000001034	23939	Mapk7	BMK1, ERK5, Erk5-T, PRKM7	protein_coding	E020	-0.174497	0.350193	E025	0.414368	0.427311	E003		0.723935	E028	0.182209	0.740615									0.28	23.71	0.2	2.33	0.27	17.99											-0.41	204.59	-0.63	2.48892e+08	0	0.04	-0.08	1.56	0.33
ENSMUSG00000001036	13855	Epn2	9530051D10Rik, AA536924, Ibp2	protein_coding	E002		0.958805
ENSMUSG00000001039	27078	B9d1	AW045994, B9, Eppb9	protein_coding	E005		0.826678
ENSMUSG00000001052	99683	Sec24b	AI605202, SEC24	protein_coding	E018	-0.232445	0.0696066	E018	-0.242653	0.119863	E020	0.138474	0.69873	E018	-0.177746	0.514064	0	0.14
ENSMUSG00000001053	212706	N4bp3	C330016O10Rik	protein_coding	E007		0.574479	E002		0.923425	E009		0.888571	E004		0.638525
ENSMUSG00000001054	66089	Rmnd5b	0610039K22Rik, Gid2	protein_coding	E008	0.163408	0.557555	E008	0.23594	0.344616	E008		0.375901	E008	0.223459	0.522882	0.01	0.04	0	0.03	0	0	0	0																									0.01
ENSMUSG00000001056	52530	Nhp2	2410130M07Rik, D11Ertd175e, Nola2	protein_coding	E001	0.27964	0.814395	E002	0.0297481	0.994545	E005		0.944541	E007	0.243783	0.990062
ENSMUSG00000001062	72325	1300018I17Rik	1300018I17Rik, 2410004N05Rik, 5DOS1, Vsp9d1	protein_coding	E017	0.272555	0.634795	E017	0.398805	0.299215	E015	-0.133466	0.731657	E034	-0.23103	0.664585	0.02	0.1	0	0.02	0	0	0	0.03	0.2	6.39	-0.04	0.17			-0.07	0.66																	0.02
ENSMUSG00000001065	57247	Zfp276	AW048709, D8Ertd370e, D8Ertd377e, Znf276	protein_coding	E021	0.649567	0.178073	E020	0.690525	0.433255	E019		0.673165	E024	-0.147641	0.562704
ENSMUSG00000001076	239659	C1ql4	C1qtnf11	protein_coding
ENSMUSG00000001082	68294	Mfsd10	0610009O03Rik, Tetran	protein_coding	E012	0.921638	0.456521	E053	-0.340016	0.634163	E005	0.35361	0.623192	E026	-0.164731	0.509081															-0.13	1.42											-0.05	0.21					0.04
ENSMUSG00000001089	269593	Luzp1	2700072H04Rik, AI266952, Luzp, mFLJ00226	protein_coding	E011	-0.0241047	0.692268	E006	0.138261	0.898931	E012	0.164539	0.810169	E011	-0.0358197	0.785886			0.1	0.47			0.11	0.67
ENSMUSG00000001095	20500	Slc13a2	mNaDC-1, Nadc1	protein_coding	E004		0.6139
ENSMUSG00000001098	330171	Kctd10	AW536343, C87062, mBACURD3	protein_coding	E001	-0.281263	0.371497	E003	-0.11989	0.808201	E011		0.623192	E003	-0.153434	0.666233	0	0	0	0	0	0	-0.01	0
ENSMUSG00000001100	67811	Poldip2	1300003F06Rik, Pdip38	protein_coding	E007	-0.174452	0.365379	E007	-0.197575	0.440747	E022		0.173134	E022	0.161355	0.444089
ENSMUSG00000001103	18292	Sebox	OG9, Og9x	protein_coding
ENSMUSG00000001105	55978	Ift20	0610009H04Rik, AU015496	protein_coding	E011	-0.462056	0.508692	E011		0.940271	E013		0.849319	E011	-0.417838	0.853678
ENSMUSG00000001119	12833	Col6a1	AI747156, Col6a-1	protein_coding
ENSMUSG00000001120	59093	Pcbp3	AlphaCP-3	protein_coding
ENSMUSG00000001123	16859	Lgals9	AA407335, AI194909, AI265545, gal-9, galectin-9, LGALS35, Lgals5	protein_coding	E012	-0.6114	0.64856	E006	-0.169105	0.944933	E017	-0.166271	0.756843	E010	-0.510602	0.909378
ENSMUSG00000001127	11836	Araf	1200013E08Rik, A-Raf, Araf1, AW495444	protein_coding	E011	-0.423016	0.00788657	E021	-0.169702	0.641483	E017	-0.135237	0.468969	E017	-0.139566	0.451767	-0.04	0.15	-0.01	0.04
ENSMUSG00000001128	18636	Cfp	BCFG, Pfc	protein_coding	E009	0.0529592	0.719195	E008	-0.0398923	0.929171	E008	-0.0625225	0.781557	E003	-0.300218	0.776621
ENSMUSG00000001131	21857	Timp1	Clgi, Timp, TIMP-1	protein_coding	E007		0.873624
ENSMUSG00000001134	22294	Uxt	0910002B17Rik	protein_coding	ENSMUSG00000001134+ENSMUSG00000009406:E014	0.350521	0.527079	ENSMUSG00000001134+ENSMUSG00000009406:E002	-0.115287	0.942134	ENSMUSG00000001134+ENSMUSG00000009406:E006		0.846499	ENSMUSG00000001134+ENSMUSG00000009406:E001	0.047903	0.925642
ENSMUSG00000001138	94218	Cnnm3	Acdp3, Clp3, mACDP3	protein_coding	E011	-1.04631	0.343443	E005	0.345781	0.943602	E001		0.759918	E003	0.195055	0.46904	0.01	0.03	0	0.02	0	0.03	0	0.03
ENSMUSG00000001143	214895	Lman2l	A630028F14Rik, VIP36-like, VIPL	protein_coding	E001	-0.332351	0.0605805	E013	-0.156016	0.81599	E013		0.768245	E016	-0.290471	0.739218	0.05	0.23	0.08	1.78	0.06	0.51	0.02	0.1																	-0.07	0.57	-0.09	1.37
ENSMUSG00000001150	54387	Mcm3ap	GANP, mKIAA0572	protein_coding	E001	-0.605952	0.138481	E025	-0.203445	0.614699	E021		0.23678	E001	-0.398906	0.569923
ENSMUSG00000001151	18541	Pcnt	AW476095, C86676, KEN, kendrin, m239Asp, m275Asp, Pcnt2	protein_coding	E020	0.281766	0.274221	E042	-0.426086	0.360647	E042	-0.479333	0.213426	E042	-0.515826	0.174183
ENSMUSG00000001155	14317	Ftcd		protein_coding
ENSMUSG00000001156	17119	Mxd1	AW122478, Mad, Mad1	protein_coding	E002	0.154692	0.187321	E006	-0.273182	0.707387	E005		0.984076	E001	-0.040252	0.474356
ENSMUSG00000001157	23885	Gmcl1	2810049L19Rik, Gcl, mglc-1	protein_coding	E009	-0.196357	0.562411	E015	0.193034	0.56084	E001		0.989385	E015	0.131193	0.862516
ENSMUSG00000001158	66618	Snrnp27	2610209M04Rik, AI449063, AU022368, Ry1	protein_coding	E006	0.126696	0.458814	E010		0.922043	E004		0.913575	E002	-0.0877574	0.88075
ENSMUSG00000001166	114643	Oas1c	Oasl2, Oasl5	protein_coding	E011		0.175301	E001		0.788942	E006		0.91476	E008		0.817293
ENSMUSG00000001168	246729	Oas1h		protein_coding
ENSMUSG00000001173	320634	Ocrl	9530014D17Rik, BB143339, OCRL1	protein_coding	E033	0.311776	0.299514	E016	-0.268849	0.389206	E036		0.616698	E033	0.294786	0.765335	0.03	0.09	0.02	0.08	0.01	0.07	0.02	0.06
ENSMUSG00000001175	12313; 12314; 12315	Calm1	AI256814, AI327027, AI461935, AL024000, Calm, CaM	protein_coding	E007	0.368855	0.0318619	E007	0.478584	0.284081	E006	0.206568	0.881771	E007	0.486579	0.628482
ENSMUSG00000001211	28169	Agpat3	AW061257, AW493985, D10Jhu12e, lpaat3	protein_coding	E002	-0.126711	0.0684143	E002	-0.0960662	0.59263	E005	0.110143	0.69873	E023	0.426863	0.811786	0.43	662.96	0.14	0.83	0.07	0.3	0.09	0.53
ENSMUSG00000001225	13487	Slc26a3	9030623B18Rik, 9130013M11Rik, AV376035, Dra	protein_coding
ENSMUSG00000001227	20359	Sema6b	Sema, Seman, semaZ, VIb	protein_coding	E009	0.335494	0.525921	E010	0.227336	0.82389	E017		0.546099	E003	0.300286	0.664585
ENSMUSG00000001228	18140	Uhrf1	AL022808, ICBP90, Np95, RNF106	protein_coding	E003	5.22528	0.215465	E007	-0.203951	0.580271	E016		0.808577	E002	-0.212714	0.733079
ENSMUSG00000001229	224897	Dpp9	6430584G11Rik, A330078I11, DPP IX, DPRP2	protein_coding	E001	-0.078439	0.6156	E007	-0.089449	0.820661	E003	-0.120503	0.538098	E017	0.12796	0.514067
ENSMUSG00000001240	54409	Ramp2		protein_coding	ENSMUSG00000078656+ENSMUSG00000001240:E027	0.627185	0.183757	ENSMUSG00000078656+ENSMUSG00000001240:E027	0.499147	0.771195	ENSMUSG00000078656+ENSMUSG00000001240:E037	-0.0374234	0.963406	ENSMUSG00000078656+ENSMUSG00000001240:E030	0.0892269	0.987924			-0.01	0.04	-0.01	0.03
ENSMUSG00000001247	54135	Lsr	ILDR3, Lisch7	protein_coding	E018	0.0509897	0.562826	E020	-0.078286	0.832131	E020	-0.0734011	0.727659	E018	0.0372834	0.919288
ENSMUSG00000001248	52857	Gramd1a	1300003M23Rik, AI415002, AW547240, D7Bwg0611e	protein_coding	E011	-0.136526	0.0519967	E011	-0.137931	0.193525	E006	-0.136743	0.541979	E011	-0.167922	0.134323																	0	0.03	0.02	0.05	0	0.03	0.01	0.03
ENSMUSG00000001249	15451	Hpn	Hlb320	protein_coding	E006		0.485772	E023		0.82739	E021		0.830734	E017		0.961106							-0.01	0.3
ENSMUSG00000001260	14405	Gabrg1	GabaA, GabaA/BZ	protein_coding
ENSMUSG00000001270	12709	Ckb	B-CK, Bck, Ck-3, Ck3, Ckbb	protein_coding	E004		0.898826							E001		0.999937
ENSMUSG00000001280	20683	Sp1	1110003E12Rik, AA450830, AI845540, Sp1-1	protein_coding	E003	-0.778891	0.276502	E003	-0.372598	0.913393	E012	0.0521147	0.846499	E019	-0.0486834	0.871651																																	-0.03
ENSMUSG00000001281	16421	Itgb7	Ly69	protein_coding	E014		0.752645	E002		0.999699
ENSMUSG00000001285	60315	Myg1	0610023A07Rik, 2810433J21Rik, 5830429P19Rik, AI325965, Gamm1	protein_coding	ENSMUSG00000001289+ENSMUSG00000001285:E045	0.331857	0.173549	ENSMUSG00000001289+ENSMUSG00000001285:E012	0.0504682	0.356272	ENSMUSG00000001289+ENSMUSG00000001285:E023	-0.231195	0.819797	ENSMUSG00000001289+ENSMUSG00000001285:E022	-0.317834	0.735605	0	0.03	0	0.03	0	0	0	0.03
ENSMUSG00000001288	19411	Rarg	AI385767, Nr1b3, RARD, RARgamma2	protein_coding	E012	-0.595032	0.589477	E010	-0.522477	0.474214	E006		0.49014	E007	0.225715	0.848148
ENSMUSG00000001289	56612	Pfdn5	1190001O17Rik, 1700010A06Rik, D15Ertd697e, Eig1, MM-1	protein_coding	ENSMUSG00000001289+ENSMUSG00000001285:E045	0.331857	0.173549	ENSMUSG00000001289+ENSMUSG00000001285:E012	0.0504682	0.356272	ENSMUSG00000001289+ENSMUSG00000001285:E023	-0.231195	0.819797	ENSMUSG00000001289+ENSMUSG00000001285:E022	-0.317834	0.735605	0	0	0	0	0	0	0	0.03															0.06	0.44									0
ENSMUSG00000001300	13642	Efnb2	ELF-2, Epl5, Eplg5, Htk-L, LERK-5, Lerk5, NLERK-1	protein_coding	E005		0.582284	E001		0.916637	E001		0.845917
ENSMUSG00000001305	67223	Rrp15	2810430M08Rik, 5430437H21Rik	protein_coding	E007		0.797488	E002		0.915718	E004		0.853381	E004		0.451767
ENSMUSG00000001313	11858	Rnd2	Arhn, Rohn	protein_coding	E005		0.236612	E005		0.813485	E007		0.999975	E006		0.95296
ENSMUSG00000001323	27364	Srr	Srs	protein_coding	E004		0.46611	E021		0.916987	E021		0.930608	E013		0.434114							-0.09	0.33																					-0.12	0.87	0	0.82
ENSMUSG00000001333	68828	Sync	1110057H03Rik, SNIP4	protein_coding	E003		0.655052
ENSMUSG00000001334	384061	Fndc5	1500001L03Rik, AI836596, C87088, PeP, Pxp	protein_coding
ENSMUSG00000001348	11433	Acp5	TRACP, TRAP	protein_coding	E006	-0.372124	0.0553671	E006	-0.107568	0.848124	E003	-0.0345399	0.542311	E006	-0.130246	0.984969
ENSMUSG00000001349	12797	Cnn1	CN, CnnI	protein_coding
ENSMUSG00000001366	71538	Fbxo9	9030401P18Rik, AA986398	protein_coding	E015	0.852199	0.00928141	E015	0.547338	0.683653	E015		0.355067	E006	0.409227	0.918157
ENSMUSG00000001376	73288	Ccdc132	1700034M03Rik, 8430415E05Rik, BLM, C87205, mKIAA1861	protein_coding	E047	-0.659781	0.0595152	E024	0.522369	0.186683	E024		0.00482784	E024	0.445951	0.274915			0.01	0.08	0	0.04
ENSMUSG00000001379	225372	Apbb3	Fe65l2, Rirl2, TR2S	protein_coding	ENSMUSG00000006050+ENSMUSG00000001379:E018	-0.553398	0.0175169	ENSMUSG00000006050+ENSMUSG00000001379:E023	-0.640549	0.12094	ENSMUSG00000006050+ENSMUSG00000001379:E023		0.0809513	ENSMUSG00000006050+ENSMUSG00000001379:E023	-0.346685	0.704076			-0.24	5.06
ENSMUSG00000001380	15115	Hars	MMHRS	protein_coding	E010	-0.149237	0.368683	E010	-0.11488	0.739234	E010		0.595954	E006	0.169679	0.60548
ENSMUSG00000001383	66492	Zmat2	2610510D14Rik, 2900082I05Rik	protein_coding	E006	-0.0943585	0.340688	E001	-0.235725	0.815406	E003		0.965963	E003	0.0705968	0.733079
ENSMUSG00000001403	68612	Ube2c	1110015A16Rik, D2Ertd695e	protein_coding	E007	0.0517037	0.910355	E007		0.87964	E006		0.984123	E002	0.0718753	0.989912																																	-0.03
ENSMUSG00000001415	229512	Smg5	BC024683, mKIAA1089	protein_coding	E018	-0.087295	0.762142	E016	0.194221	0.829998	E008	-0.114105	0.893174	E011	0.142382	0.507066	0	0.03					0	0.03
ENSMUSG00000001416	12462	Cct3	AL024092, Cctg, Tcp1-rs3, TriC-P5	protein_coding	E002	-1.44158	0.224585	E023	0.0744947	0.90368	E008	0.330449	0.855278	E031	0.0684206	0.919758	-0.01	0	0	0	-0.01	0	-0.01	0	0.14	5.21															0	0.03	0	0.03	0.01	0.04	0	0.03	0.01
ENSMUSG00000001417	58176	Rhbg		protein_coding	ENSMUSG00000001417+ENSMUSG00000010538:E018		0.967185	ENSMUSG00000001417+ENSMUSG00000010538:E016		0.995785
ENSMUSG00000001418	56700	0610031J06Rik	AB027141, NCU-G1	protein_coding	E023	0.183726	0.00205957	E023	0.148263	0.12094	E023	0.169007	0.0601119	E023	0.134241	0.25474	0	0	0	0	0.01	0	0.07	0.38																	0.06	0.65					0.09	22.55	-0.08
ENSMUSG00000001419	17261	Mef2d	C80750	protein_coding	E024	-0.0728792	0.585784	E009	0.5065	0.885906	E012	0.152421	0.563654	E009	0.579299	0.686157
ENSMUSG00000001420	71913	Tmem79	2310042N02Rik, 2310074C17Rik	protein_coding	E008		0.947112	E005		0.999675
ENSMUSG00000001424	56463	Snd1	AL033314	protein_coding	E040	0.16482	0.0440848	E040	0.114096	0.715958	E026	-0.0838028	0.892484	E040	0.167422	0.604007	0	0	0.01	0	0.01	0	0.01	0
ENSMUSG00000001435	12822	Col18a1		protein_coding
ENSMUSG00000001436	20509	Slc19a1	AI323572, RFC, RFC-1, RFC1	protein_coding	E015		0.508692	E011		0.706026	E013		0.902749	E022		0.674666																									-0.07	0.28			-0.18	0.88	-0.12	0.55
ENSMUSG00000001440	16211	Kpnb1	AA409963, Impnb, IPOB	protein_coding	E001	-0.0611386	0.168483	E014	0.0945766	0.783635	E013	0.0706043	0.917801	E013	0.137359	0.593715																																	-0.01
ENSMUSG00000001441	19155	Npepps	AAP-S, goku, MP100, Psa, R74825	protein_coding	E032	0.815636	0.368683	E046	0.201438	0.590383	E027	0.160744	0.739906	E002	-0.255667	0.487928	-0.05	0.25	0	0.04	0.01	0.04	0.02	0.08																			-0.02	0.05			-0.02	0.05	-0.09
ENSMUSG00000001444	57765	Tbx21	Tbet, Tblym, TBT1	protein_coding	E001		1
ENSMUSG00000001445	107732	Mrpl10	0610040E02Rik, C78440, MRP-L8, Rpml8	protein_coding	E007	0.108496	0.554773	E007	0.0851774	0.854572	E009		0.947632	E009	-0.145592	0.460422
ENSMUSG00000001467	13121	Cyp51	AI426508, Cyp51a1, CYPLI, Ldm, P450-14DM, P450LI	protein_coding	E001	-0.0817294	0.394097	E010	0.107364	0.871975	E013	-0.074974	0.902784	E001	-0.0496596	0.888507
ENSMUSG00000001472	66855	Tcf25	1100001J13Rik, 1810041K11Rik, D8Ertd325e, mKIAA1049, Nulp1	protein_coding	E013	-0.0710778	0.129538	E012	-0.0906095	0.64788	E005	0.0955772	0.317291	E005	0.107294	0.109138	-0.02	0.08																															0
ENSMUSG00000001473	67951	Tubb6	2310057H16Rik, BB220206	protein_coding	E003	0.0644691	0.672848	E002	-0.115997	0.415645	E002	-0.0623445	0.796679	E001	-0.0625615	0.955584
ENSMUSG00000001482	23854	Def8	AI449518, D8Ertd713e, DEF-8	protein_coding	E024	-0.0633787	0.0410383	E024	-0.0585821	0.389206	E024	-0.0541257	0.667935	E012	0.293922	0.201239							-0.11	0.49
ENSMUSG00000001493	17285	Meox1	AI385561, D330041M02Rik, Mox-1, Mox1	protein_coding
ENSMUSG00000001494	74499	Sost	5430411E23Rik	protein_coding
ENSMUSG00000001496	21869	Nkx2-1	AV026640, Nkx2.1, T/EBP, Titf1, Ttf-1	protein_coding
ENSMUSG00000001497	18511	Pax9	Pax-9	protein_coding
ENSMUSG00000001504	16372	Irx2	IRX6	protein_coding
ENSMUSG00000001506	12842	Col1a1	Col1a-1, Cola-1, Cola1, Mov-13, Mov13	protein_coding
ENSMUSG00000001507	16400	Itga3	AA407068, CD49C, GAPB3	protein_coding	E001		0.992843
ENSMUSG00000001508	20391	Sgca	50DAG, Asg	protein_coding
ENSMUSG00000001510	13393	Dlx3	AV237891, Dlx-3	protein_coding
ENSMUSG00000001517	14235	Foxm1	AA408308, AW554517, BB238854, Fkh16, Foxm1b, HFH-11B, MPHOSPH2, Mpm2, WIN	protein_coding	ENSMUSG00000079304+ENSMUSG00000001517:E006	-2.0561	0.292347	ENSMUSG00000079304+ENSMUSG00000001517:E018	0.0985846	0.94762	ENSMUSG00000079304+ENSMUSG00000001517:E020		0.94054	ENSMUSG00000079304+ENSMUSG00000001517:E018	-0.103632	0.785763			0.14	0.51
ENSMUSG00000001518	101142	Itfg2	2700050P07Rik, AI646725	protein_coding	E005		0.560591	E012		0.443302	E014		0.972151	E012		0.498511																									0.06	0.24	0	0.16	0	0.21	-0.06	0.28
ENSMUSG00000001520	60345	Nrip2	AW491344, NIX1	protein_coding	E017		0.638392
ENSMUSG00000001521	22158	Tulp3	2310022L06Rik, AI316887	protein_coding	E014		0.293955	E001		0.334454
ENSMUSG00000001524	14885	Gtf2h4	AW545633, BTF2 p52, p44, p52, TFIIH	protein_coding	E011	-0.299118	0.102317	E010	-0.321822	0.658346	E014		0.748719	E037	0.317236	0.638525											-0.09	0.44	0	0.34	0.01	0.37									-0.23	1.34	-0.24	1.72	-0.12	0.67	-0.29	8.86
ENSMUSG00000001525	22154	Tubb5	AA408537, AI596182, B130022C14Rik, M(beta)5	protein_coding	E006	-0.293839	0.566834	E009	0.347244	0.37853	E009	0.341768	0.522688	E006	0.286183	0.794059
ENSMUSG00000001542	192657	Ell2		protein_coding	E012	-0.129887	0.0147903	E001	-0.184533	0.771788	E003		0.792225	E001	-0.401361	0.0829069
ENSMUSG00000001552	16480	Jup	D930025P04Rik, PG	protein_coding	E003	0.0963696	0.38089	E020	-0.0819211	0.704312	E003	0.0742972	0.794816	E002	-0.0919548	0.851334	0	0	0	0	0	0	-0.01	0	-0.02	0.12	-0.01	0	-0.02	0.06	-0.01	0
ENSMUSG00000001555	14230	Fkbp10	AI325255, FKBP-10, FKBP-65, Fkbp-rs1, Fkbp1-rs, Fkbp6, FKBP65, Fkbprp	protein_coding
ENSMUSG00000001558	66720	Klhl10	4921517C11Rik	protein_coding	E005		0.937787
ENSMUSG00000001566	15285	Mnx1	HB9, Hlxb9, MNR2	protein_coding
ENSMUSG00000001569	433864	Nom1	D5Kng1, Gm1040	protein_coding	E010	0.166827	0.736689	E006	0.243204	0.570486	E006		0.614759	E001	-0.131202	0.389523
ENSMUSG00000001576	67458	Ergic1	1200007D18Rik, maa-136	protein_coding	E002	-0.504878	0.576707	E006	-0.123752	0.935255	E017	-0.112984	0.698081	E003	0.122416	0.92932	-0.03	0.16
ENSMUSG00000001583	83813	Tnk1	Kos1, Tnk1a, Tnk1b	protein_coding
ENSMUSG00000001588	216859	Acap1	Centb1	protein_coding	E004	-0.308982	0.569235	E013		0.852392	E032		0.0809513	E032	-0.37703	0.604995													-0.41	18.77
ENSMUSG00000001604	21401	Tcea3	S-II, SII-K1	protein_coding	E012		0.938034
ENSMUSG00000001622	12994	Csn3	AW208918, CSN10, Csnk	protein_coding
ENSMUSG00000001627	15982	Ifrd1	Ifnl, PC4, Tis7	protein_coding	E010	-0.131447	0.120324	E008	0.141418	0.620937	E011		0.718436	E011	-0.148117	0.702005	-0.02	0.03	-0.01	0.04	-0.01	0.04	-0.01	0.03
ENSMUSG00000001630	232533	Stk38l	4930473A22Rik, B230328I19, Ndr2, Ndr54	protein_coding	E001		0.629538	E009		0.776049	E009		0.248043	E009		0.899575
ENSMUSG00000001632	78783	Brpf1	4833438B11Rik, 4930540D11Rik, Brpf2	protein_coding	E025	0.735354	0.4945	E005	-0.0828455	0.668561	E005	-0.0965965	0.4789	E005	-0.0727635	0.835503											0.19	9.52	0.09	0.46	0.13	1.21																	0.09
ENSMUSG00000001642	11677	Akr1b3	Ahr-1, Ahr1, Akr1b1, Aldor1, Aldr1, ALR2, AR	protein_coding	E013	1.10846	0.329202	E022	0.23293	0.96949	E014	-0.204888	0.849024	E012	0.0918833	0.952089							0.13	0.41
ENSMUSG00000001655	15422	Hoxc13		protein_coding
ENSMUSG00000001656	109663	Hoxc11	Hox-3.7	protein_coding
ENSMUSG00000001657	15426	Hoxc8	D130011F21Rik, Hox-3.1	protein_coding
ENSMUSG00000001661	15425	Hoxc6	Hox-3.3, Hox-6.1	protein_coding
ENSMUSG00000001663	14871	Gstt1	AI255817, Gstt1-1	protein_coding	E002		0.516885
ENSMUSG00000001665	103140	Gstt3	AI118089	protein_coding	ENSMUSG00000092360+ENSMUSG00000001665+ENSMUSG00000001666:E002	0.404744	1.80784e-07	ENSMUSG00000092360+ENSMUSG00000001665+ENSMUSG00000001666:E003	0.256262	0.153538	ENSMUSG00000092360+ENSMUSG00000001665+ENSMUSG00000001666:E007		0.600355	ENSMUSG00000092360+ENSMUSG00000001665+ENSMUSG00000001666:E007	-0.0687271	0.976387					-0.1	0.41
ENSMUSG00000001666	13202	Ddt	C78655	protein_coding	ENSMUSG00000092360+ENSMUSG00000001665+ENSMUSG00000001666:E002	0.404744	1.80784e-07	ENSMUSG00000092360+ENSMUSG00000001665+ENSMUSG00000001666:E003	0.256262	0.153538	ENSMUSG00000092360+ENSMUSG00000001665+ENSMUSG00000001666:E007		0.600355	ENSMUSG00000092360+ENSMUSG00000001665+ENSMUSG00000001666:E007	-0.0687271	0.976387
ENSMUSG00000001670	234724	Tat		protein_coding
ENSMUSG00000001672	73608	Marveld3	1810006A16Rik, AI642133, Marvd3, Mrvldc3	protein_coding
ENSMUSG00000001674	66942	Ddx18	2310005B10Rik	protein_coding	E002	1.05638	0.369986	E006	0.136224	0.630931	E006		0.714187	E001	0.282288	0.596019
ENSMUSG00000001687	24109	Ubl3	AW108023, HCG	protein_coding	E001	-0.18918	0.00378396	E010	-0.285422	0.560857	E002	0.0434738	0.613982	E010	-0.291875	0.303919
ENSMUSG00000001700	107022	Gramd3	9030613F08Rik, 9130427A09Rik, AW061306, NS3TP2	protein_coding
ENSMUSG00000001707	66143	Eef1e1	1110003A02Rik	protein_coding	E003	0.0730529	0.841844	E002		0.999699	E001		0.98019	E003		0.999937
ENSMUSG00000001729	11651	Akt1	Akt, PKB, PKB/Akt, PKBalpha, Rac	protein_coding	E006	0.03778	0.571991	E004	0.300157	0.718449	E023	-0.062991	0.702594	E004	0.227503	0.862376	0	0	0	0	0	0	0	0																									0
ENSMUSG00000001739	60363	Cldn15	2210009B08Rik, BB107105	protein_coding	E006		0.695315
ENSMUSG00000001741	16170	Il16	mKIAA4048	protein_coding	E003	0.135754	0.244772	E006	0.563467	0.815984	E005		0.810169	E005	-0.169723	0.638009
ENSMUSG00000001750	27060	Tcirg1	ATP6a3, Atp6i, ATP6N1C, oc, OC-116, OPTB1, Stv1, TIRC7, Vph1	protein_coding	E023	-0.147962	0.0267677	E029	0.106468	0.0158595	E019	-0.0301431	0.845937	E006	-0.0677316	0.715911	-0.01	0	-0.01	0	-0.01	0	-0.01	0	0.12	1000000000000															0.06	3.29	0.01	0.24	0.02	1.14	0.01	0	-0.01
ENSMUSG00000001751	27419	Naglu		protein_coding	E007	0.106908	0.510024	E001	-0.0973204	0.971619	E002	-0.0568171	0.942816	E007	0.102688	0.704377
ENSMUSG00000001755	71743	Coasy	1300003G02Rik, Dpck, Ppat, Ukr1	protein_coding	E006	-0.565254	0.594547	E012		0.703259	E012		0.652495	E007	0.112632	0.894814
ENSMUSG00000001761	319757	Smo	bnb, E130215L21Rik, Smoh, smoothened	protein_coding
ENSMUSG00000001763	232670	Tspan33	1300010A20Rik, AI035228, Pen	protein_coding
ENSMUSG00000001767	66877	Crnkl1	1200013P10Rik, 5730590A01Rik, C80326, crn	protein_coding	E016	0.124168	0.618889	E012	-0.0718821	0.970174	E015		0.958768	E006	-0.177995	0.652786
ENSMUSG00000001768	74030	Rin2	2010003K16Rik, 4632403N06Rik, AW821980, RASSF4	protein_coding	E021	0.109586	0.0980533	E016	-0.309163	0.437211	E021	0.113021	0.375901	E021	0.0961559	0.441756
ENSMUSG00000001773	53320	Folh1	GCP2, mopsm	protein_coding
ENSMUSG00000001774	66917	Chordc1	1110001O09Rik, AA409036, Chp-1, morgana	protein_coding	E011	-0.146383	0.00543903	E011	-0.0635932	0.912898	E011		0.939424	E011	-0.0990149	0.710228
ENSMUSG00000001783	28088	D10Wsu52e	AI255213, AI463255, FAAP, HSPC117, Rtcb	protein_coding	E007	0.0850629	0.372564	E005	-0.0753407	0.895429	E010	-0.0611773	0.907754	E009	0.102518	0.639179
ENSMUSG00000001785	103136	Pwp1	2310058A11Rik, 2610205J09Rik, AI098170, AL022879, AV083409, AW550690	protein_coding	E006	0.180043	0.653893	E004	-0.167135	0.942601	E006		0.892805	E006	0.210428	0.862765																									-0.02	0.08
ENSMUSG00000001786	69754	Fbxo7	2410015K21Rik, A230052G17Rik, AI117679, AW260462, C85118	protein_coding	E010	0.159481	0.688722	E010		0.620091	E010		0.796681	E009	0.24116	0.644977
ENSMUSG00000001794	12336	Capns1	Capa-4, Capa4, Capn4, D7Ertd146e	protein_coding	E020	-1.11316	0.200173	E016	-0.0845854	0.905111	E001	0.355752	0.72503	E013	-0.0397689	0.497387
ENSMUSG00000001802	435965	Lrp3		protein_coding
ENSMUSG00000001804	16769	Dsg4	CDHF13, lah	protein_coding
ENSMUSG00000001815	14029	Evx2	Evx-2	protein_coding
ENSMUSG00000001819	15433	Hoxd13	Hox-4.8, spdh	protein_coding
ENSMUSG00000001823	15432	Hoxd12	Hox-4.7, Hox-5.6	protein_coding
ENSMUSG00000001827	14275	Folr1	FBP1, Folbp-1, Folbp1	protein_coding
ENSMUSG00000001829	20480	Clpb	AL118244, Skd3	protein_coding	E036	-0.2288	0.556463	E005		0.411337	E016		0.806843	E005	-0.244634	0.7751																					0.23	0.84	0.24	1.64
ENSMUSG00000001833	235072	Sept7	Cdc10, E430034N22	protein_coding	E015	-0.197274	0.342226	E002	-0.0904442	0.923348	E013	0.059027	0.91149	E006	0.0732704	0.977827	0	0			0	0	0	0									0	0.03	0.01	0.04	0	0	0	0
ENSMUSG00000001844	72881	Zdhhc4	1810021D01Rik, 2900029I10Rik	protein_coding	E023	0.613755	0.558939	E028	0.227268	0.941065	E022		0.910533	E022	0.130927	0.803581																																	-0.16
ENSMUSG00000001847	19353	Rac1	AL023026, D5Ertd559e	protein_coding	E009	1.84416	0.11053	E006	0.390537	0.861931	E006	0.314426	0.900023	E002	-0.0264918	0.693048							0	0
ENSMUSG00000001855	227720	Nup214	BC039282, CAN, D2H9S46E	protein_coding	E056	0.362015	0.45895	E043	0.267131	0.683064	E045	0.210378	0.417671	E019	0.481794	0.709477	0.01	0.1	0.02	0.12	0.11	1.55	0	0.03
ENSMUSG00000001864	108897	Aif1l	2810003C17Rik, AI043124, C87647, Iba2	protein_coding
ENSMUSG00000001865	12873	Cpa3	MC-CPA, mMC-CPA	protein_coding
ENSMUSG00000001870	268977	Ltbp1	9430031G15Rik, 9830146M04, b2b1000Clo, Ltbp-1, Tgfb	protein_coding
ENSMUSG00000001891	216558	Ugp2		protein_coding	E009	0.162149	0.00402873	E009	0.163245	0.0359781	E009	0.136443	0.563654	E009	0.0878032	0.549444																									0	0	0	0	0	0	0	0
ENSMUSG00000001901	192775	Kcnh6	m-erg2	protein_coding
ENSMUSG00000001909	212528	Trmt1	6720406L13Rik, 6720477L24, D8Ertd812e	protein_coding	E003	-1.07612	0.0105512	E048	-0.391192	0.311234	E037	-0.288579	0.313039	E041	-0.32311	0.187367									0.33	16.91	0.14	3.98													0.12	0.51	0.1	0.41	0.17	2.77	0.12	0.51	-0.17
ENSMUSG00000001910	66830	Nacc1	2010001H03Rik, 4930511N13Rik, Btbd14b, Nac1	protein_coding	E005	0.0355846	0.850226	E005	0.0533439	0.943177	E003	-0.0789785	0.927079	E005	0.0655856	0.672797
ENSMUSG00000001911	18032	Nfix		protein_coding	E003	-0.0744084	0.0350371	E021	0.327648	0.932734	E018	0.246492	0.62646	E018	0.228445	0.554407			0.23	13.75			0.11	0.73
ENSMUSG00000001918	20514	Slc1a5	AAAT, ASCT2, ATBO, M7V1, M7VS1, R16, RDRC, Slc1a7	protein_coding	E019	-0.279888	0.0664853	E020	0.170483	0.562597	E008	0.444497	0.729479	E002	-0.0780552	0.350205									0.22	253.69					0.1	0.75
ENSMUSG00000001924	22201	Uba1	A1S9, Sbx, Ube-1, Ube1x	protein_coding	E030	-0.101311	0.285158	E014	0.0717384	0.715886	E013	0.0862076	0.765914	E033	-0.0748413	0.48345
ENSMUSG00000001930	22371	Vwf	6820430P06Rik, AI551257, B130011O06Rik, C630030D09, F8VWF, VWD	protein_coding	E018	-0.299541	0.0818877	E043	0.201063	0.437211	E021	-0.228341	0.336619	E010	-0.256637	0.0445624
ENSMUSG00000001942	22619	Siae	LSE, Ysg2	protein_coding	E002	0.129396	0.714578	E002	0.181869	0.715958	E002		0.610828	E003	0.0812333	0.955644
ENSMUSG00000001943	57276	Vsig2	1190004B15Rik, 2210413P10Rik, AU040484, Ctm, CTX	protein_coding
ENSMUSG00000001946	69524	Esam	2310008D05Rik, Esam1, W117m	protein_coding
ENSMUSG00000001948	20686	Spa17	Sp17	protein_coding	E003		0.822612
ENSMUSG00000001962	108160	Fam50a	D0HXS9928E, XAP-5	protein_coding	E004	-0.0950597	0.526579	E016	0.0625807	0.917358	E001	-0.454483	0.795617	E013	0.0734757	0.906854	0	0	0.01	0.04	0	0	0	0
ENSMUSG00000001964	13726	Emd	AW550900, Sta	protein_coding	ENSMUSG00000081375+ENSMUSG00000001964:E015	-0.132511	0.484694	ENSMUSG00000081375+ENSMUSG00000001964:E019	0.496395	0.406605	ENSMUSG00000081375+ENSMUSG00000001964:E007		0.976889	ENSMUSG00000081375+ENSMUSG00000001964:E015	-0.105754	0.79916	0	0	0	0	0	0	0	0
ENSMUSG00000001983	70207	Taco1	2310066I18Rik, Ccdc44	protein_coding	E001		0.808909	E003		0.967252	E005		0.946389	E002		0.999937
ENSMUSG00000001985	14807	Grik3	9630027E11, GluK3, Glur-7, Glur7, GluR7-3	protein_coding
ENSMUSG00000001986	53623	Gria3	2900064I19Rik, GluA3, Glur-3, GluR-C, GluR-K3, Glur3, Gluralpha3	protein_coding
ENSMUSG00000001988	18142	Npas1	bHLHe11, MOP5	protein_coding	E001		0.719792	E001		0.999699	E001		0.999975	E001		0.999937
ENSMUSG00000001995	244668	Sipa1l2	BC058408, mKIAA1389	protein_coding	E014		0.22987	E002		0.415645	E002		0.843004	E006		0.842687	0.06	0.27	0.02	0.34	0.06	0.28	0.01	0.32
ENSMUSG00000001998	108011	Ap4e1	2310033A20Rik, 9930028M04Rik, AV087807	protein_coding	E004	-0.746274	0.472043	E037		0.721782	E036		0.809853	E016	0.356381	0.395662
ENSMUSG00000001999	109778	Blvra	0610006A11Rik, 2500001N03Rik, Blvr	protein_coding	E004	0.187722	0.611714	E013	0.489736	0.941017	E013	0.620532	0.813672	E017	-0.04484	0.888507
ENSMUSG00000002006	245469	Pdzd4	B230341P03, D130075J17Rik, Kiaa1444-hp, LU1, Pdzk4, PDZRN4L, Pdzrnk4l, Xlu	protein_coding	E001		0.623455
ENSMUSG00000002007	56504	Srpk3	Mssk1, Stk23	protein_coding
ENSMUSG00000002010	15929	Idh3g		protein_coding	E016	-0.51335	0.0718603	E014	0.0880604	0.52213	E007	-0.097465	0.625993	E016	-0.377869	0.501808	0.11	3.39							0.25	101.55
ENSMUSG00000002012	93843	Pnck	Bstk3, Camk1b, CaMKIbeta2, caMKlb1, CaMKlb2, Punc	protein_coding
ENSMUSG00000002014	20832	Ssr4	AW743063, C78062, Trap	protein_coding	E007	-0.281969	0.284722	E006	-0.0543232	0.929962	E020	0.0828411	0.854213	E005	-0.0797826	0.890999
ENSMUSG00000002015	27061	Bcap31	Bap31	protein_coding	E005	0.0578878	0.78067	E006	0.0358165	0.954848	E002	-0.0439721	0.963902	E004	0.0529532	0.862376
ENSMUSG00000002017	72722	Fam98a	2810405J04Rik, AL024114	protein_coding	E001	-0.0494423	0.783273	E007	0.137316	0.829669	E011		0.853381	E001	-0.0540759	0.885966
ENSMUSG00000002020	16997	Ltbp2	AW208642	protein_coding	E002		0.175002	E003		0.986961	E003		0.999975	E003		0.987014
ENSMUSG00000002028	214162	Mll1	6430520K01, ALL-1, All1, Cxxc7, HRX, HTRX1, mKIAA4050, Mll, Mll1	protein_coding	E018	0.320271	0.633161	E034	0.389707	0.562454	E037	-0.56621	0.432194	E034	0.372798	0.760459	-0.15	0.78	0.07	0.34	0.06	0.3	-0.08	0.5																	0.17	0.75	0.34	5.67					-0.03
ENSMUSG00000002031	76568	Ift46	1500035H01Rik, AA408110, AI663846, c11orf2, R75047	protein_coding	E042	0.410241	0.127824	E028	0.166189	0.757935	E042		0.743565	E042	0.236087	0.866628	-0.04	0.1	-0.01	0.04	0	0.05	-0.01	0.04															0	1.28
ENSMUSG00000002032	71687	Tmem25	0610039J01Rik, AI429491	protein_coding
ENSMUSG00000002033	12502	Cd3g	Ctg-3, Ctg3, T3g	protein_coding
ENSMUSG00000002043	67091	Trappc6a	1810073E21Rik, 4930519D19Rik, AI480686, mhyp, TRS33	protein_coding	E009	-0.473825	0.155685	E009	-0.21963	0.84162	E006		0.506112	E006	0.156467	0.913847	0.03	0.13	0	0.05	0	0.06	0.01	0.07	0.18	302.55			0.07	0.38																			0.01
ENSMUSG00000002052	20926	Supt6h	5131400N11Rik, AI132449, mKIAA0162, SPT6, Supt6h	protein_coding	E018	0.21546	0.40508	E013	0.161178	0.626037	E004	0.120825	0.732584	E018	0.239996	0.509343
ENSMUSG00000002055	54141	Spag5	AI874642, D11Bhm180e, Deepest, MAP126, Mastrin, S17	protein_coding	E027	-0.343478	0.212102	E004		0.715109	E037		0.430946	E015	-0.487011	0.63475											0	0.4			-0.18	0.7
ENSMUSG00000002057	15218	Foxn1	D11Bhm185e, Hfh11, nu, nude, Whn	protein_coding
ENSMUSG00000002058	22248	Unc119	D11Bhm52, HRG4, MRG4, Rg4, Rtg4, Unc119h	protein_coding	E015	0.161656	0.781548	E009	-0.0426423	0.934386	E013	-0.0412904	0.962441	E016	0.0164728	0.940322																																	-0.02
ENSMUSG00000002059	19376	Rab34	AI326479, Narr, Rah, Rah1	protein_coding	E023		0.428147	E020		0.991851
ENSMUSG00000002064	20316	Sdf2	AI853825	protein_coding	E003	-1.24521	0.120182	E003	-0.526531	0.85445	E007		0.881861	E007	0.149148	0.481882																																	-0.01
ENSMUSG00000002068	12447	Ccne1	AW538188, CycE1	protein_coding	E019	-0.537316	0.756599	E005		0.96174	E005		0.373893	E013		0.970527
ENSMUSG00000002076	74377	Hsf2bp	4932437G14Rik	protein_coding
ENSMUSG00000002083	170770	Bbc3	PUMA, PUMA/JFY1	protein_coding	E002		0.134617	E001		0.695594	E001		0.909153	E006		0.885391
ENSMUSG00000002100	17868	Mybpc3		protein_coding	E020		0.464113	E034		0.992524
ENSMUSG00000002102	19182	Psmc3	TBP-1	protein_coding	E030	-0.583587	0.260356	E011	0.0981807	0.462486	E027	0.0397095	0.974557	E022	0.0416962	0.955565	0	0	0	0	0	0	0	0
ENSMUSG00000002103	11432	Acp2	Acp-2, LAP	protein_coding	E014	0.318705	0.0179417	E003	-0.774637	0.141941	E003	-0.460829	0.768574	E003	-0.28893	0.881888	0.01	0	0	0	0	0	0.01	0					0.09	2.57
ENSMUSG00000002104	19400	Rapsn	43kDa, Nraps, Raps, rapsyn	protein_coding
ENSMUSG00000002105	68427	Slc39a13	1100001L14Rik, AA387663, ZIP13	protein_coding	E010	1.33005	0.227159	E028	-0.280504	0.937783	E012		0.895972	E024	0.147999	0.9281	0	0.03	0	0.03	0	0.03	0.02	0.07																									-0.06
ENSMUSG00000002107	14007	Celf2	B230218O03, B230345P09Rik, C88023, CELF-2, CUG-BP2, Cugbp2, D230046B21Rik, Etr-3, mETR-3, Napor, Napor-2	protein_coding	E007	-0.254486	0.0672185	E005	-0.288997	0.365031	E010	0.0688803	0.492235	E002	-0.0547071	0.401385	0	0					0.09	2.17					0	0.03
ENSMUSG00000002108	22259	Nr1h3	AU018371, LXR, RLD1, Unr1	protein_coding	ENSMUSG00000086206+ENSMUSG00000002108:E019	-1.02098	0.441588	ENSMUSG00000086206+ENSMUSG00000002108:E014	0.0899655	0.685432	ENSMUSG00000086206+ENSMUSG00000002108:E008	-0.0603308	0.925296	ENSMUSG00000086206+ENSMUSG00000002108:E014	0.103391	0.656132	0	0	0	0	0	0	0	0.03					0.03	0.13	0.12	1.79																	0.06
ENSMUSG00000002109	107986	Ddb2	2610043A19Rik	protein_coding	E013		0.0762527	E014		0.973609	E008		0.941329	E013		0.303746	0	0.14					-0.06	0.42
ENSMUSG00000002111	20375	Sfpi1	Dis-1, Dis1, PU.1, Sfpi-1, Sfpi1, Spi-1, Tcfpu1, Tfpu.1	protein_coding	E006	0.191851	0.553621	E005	0.0706206	0.800976	E006	0.12468	0.93063	E005	0.0485526	0.915709
ENSMUSG00000002129	67465	Sf3a1	1200014H24Rik, 5930416L09Rik, AI159724	protein_coding	E016	-0.313334	0.409549	E021	0.232877	0.530433	E014	-0.0906927	0.928689	E021	0.240096	0.477863
ENSMUSG00000002147	20852	Stat6		protein_coding	E022	-0.386708	0.267743	E002	-0.125829	0.489329	E008	0.0799581	0.847557	E008	0.115314	0.48345	-0.06	24.19	-0.04	2.57			-0.04	0.7
ENSMUSG00000002190	12745	Clgn	4930459O04Rik, AI528775, Cln	protein_coding	E018		0.698906
ENSMUSG00000002204	16541	Napsa	KAP, Kdap, NAP1, pronapsin, SNAPA	protein_coding	E010	0.145584	0.581993	E004	-0.0572058	0.975472	E009		0.846498	E005	-0.11126	0.79916
ENSMUSG00000002205	101568	Vrk3	AI428238	protein_coding	E006	-0.28772	0.416688	E024	0.277795	0.117445	E018	-0.113641	0.902749	E018	-0.150097	0.824261	0	0	0.07	0.18	0.01	0	0	0.05
ENSMUSG00000002210	71997	Smg9	1500002O20Rik, AI429693, N28092	protein_coding	E004	0.239544	0.219859	E002	-0.12405	0.96754	E011		0.96201	E017	0.193931	0.835503
ENSMUSG00000002221	55982	Paxip1	D5Ertd149e, PTIP	protein_coding	E017	0.194533	0.744544	E017	0.515432	0.0872606	E016		0.604854	E017	0.270641	0.772864
ENSMUSG00000002222	68477	Rmnd5a	1110007A06Rik, AJ237586, AW125795, Gid2, MTA.D02.090	protein_coding	E010	1.71883	0.355221	E001	-0.241431	0.841002	E018	0.145385	0.765914	E011	0.181981	0.408329
ENSMUSG00000002227	17454	Mov10	C77703, Mov-10	protein_coding	E024	-0.840496	0.454047	E012		0.899519	E015		0.596621	E001	0.190543	0.822354																									0.29	0.76	0.23	1.1	0.01	1.05	0.03	0.63
ENSMUSG00000002228	71887	Ppm1j	2310008J22Rik, PP2Czeta, Ppp2cz	protein_coding	E003	-0.159964	0.711782	E006	-0.165536	0.567808	E010		0.802348	E002	-0.197198	0.932365
ENSMUSG00000002233	11853	Rhoc	AI324259, Arh9, Arhc	protein_coding	E005	-0.0561286	0.598928	E013	0.134846	0.930742	E001	0.170153	0.987068	E001	0.237175	0.93724
ENSMUSG00000002240	73779	4930432K09Rik		protein_coding
ENSMUSG00000002249	21678	Tead3	DTEF-1, ETFR-1, Tcf13r2, TEAD-3, TEF-5	protein_coding
ENSMUSG00000002250	19015	Ppard	Nr1c2, NUC-1, NUC1, PPAR-beta, PPAR-delta, Pparb, Pparb/d, PPARdelta, PPAR[b]	protein_coding	E015	0.414155	0.693316	E012	0.361489	0.751588	E020	0.0810099	0.677811	E018	0.132523	0.450958	0	0	0	0	0	0	0	0
ENSMUSG00000002257	23853	Def6	2410003F05Rik, 6430538D02Rik, AV094905, Ibp, Slat, Slat2, Slat6	protein_coding	E004	-0.60717	0.726364	E001	-0.213516	0.624976	E005	-0.0840121	0.800176	E001	-0.346901	0.401385
ENSMUSG00000002265	18616	Peg3	AL022617, ASF-1, End4, Gcap4, mKIAA0287, Pw1, Zfp102	protein_coding
ENSMUSG00000002266	22776	Zim1		protein_coding
ENSMUSG00000002274	70083	Metrn	1810034B16Rik, Hyrac	protein_coding	E005		0.980992																																										-0.01
ENSMUSG00000002279	76483	Lmf1	2400010G15Rik, AW822050, cld, Tmem112	protein_coding	E027	1.16121	0.44094	E024	0.0909221	0.980903	E023		0.866394	E021	0.138593	0.924548			-0.01	0.05																	-0.14	0.83	0.1	0.53
ENSMUSG00000002280	67563	Narfl	9030612I22Rik, AI504405, PRN	protein_coding	E009	0.167372	0.30243	E009	0.22009	0.218414	E015		0.57035	E016	0.682179	0.174183
ENSMUSG00000002289	57875	Angptl4	Arp4, Bk89, Fiaf, Hfarp, Ng27, Pgar, Pgarg, Pp1158	protein_coding	E005	0.0754002	0.277523	E011	-0.0348047	0.965137	E001	0.227731	0.920124	E011	-0.0437047	0.951347
ENSMUSG00000002297	27214	Dbf4	AA545217, Ask	protein_coding	E008	-0.353833	0.419237	E021		0.765974	E021		0.549332	E006	-0.136636	0.972614
ENSMUSG00000002307	13163	Daxx		protein_coding	E025	-0.151383	0.395903	E025	-0.145086	0.62284	E011	-0.113125	0.6411	E025	-0.0775297	0.939669
ENSMUSG00000002308	54219	Cd320	425O18-1, 8D6, D17Ertd716e, NG29, VLDL	protein_coding	E008		0.261953	E004		0.96949	E006		0.956683	E004		0.94234
ENSMUSG00000002319	75751	Ipo4	8430408O15Rik, AA409693, Imp4a, RanBP4	protein_coding	ENSMUSG00000002319+ENSMUSG00000002320:E094	0.788967	0.0736059	ENSMUSG00000002319+ENSMUSG00000002320:E079	0.116629	0.78429	ENSMUSG00000002319+ENSMUSG00000002320:E069	0.162927	0.133161	ENSMUSG00000002319+ENSMUSG00000002320:E036	-0.2032	0.618954	0.01	0.04	0	0	-0.01	0.04	-0.01	0.04																									0.02
ENSMUSG00000002320	74140	Tm9sf1	1200014D02Rik, AI893436, MP70	protein_coding	ENSMUSG00000002319+ENSMUSG00000002320:E094	0.788967	0.0736059	ENSMUSG00000002319+ENSMUSG00000002320:E079	0.116629	0.78429	ENSMUSG00000002319+ENSMUSG00000002320:E069	0.162927	0.133161	ENSMUSG00000002319+ENSMUSG00000002320:E036	-0.2032	0.618954																									0.01	0.07	0	0.03	0	0	0.01	0.04	0.01
ENSMUSG00000002324	56739	Rec8	mrec, Rec8L1	protein_coding
ENSMUSG00000002325	16391	Irf9	Irf-9, Isgf3g, p48	protein_coding	ENSMUSG00000002325+ENSMUSG00000047098:E050	0.315156	7.63528e-08	ENSMUSG00000002325+ENSMUSG00000047098:E050	0.172218	0.204863	ENSMUSG00000002325+ENSMUSG00000047098:E050	0.1268	0.618418	ENSMUSG00000002325+ENSMUSG00000047098:E024	0.387993	0.254012
ENSMUSG00000002326	105446	Gmpr2	1810008P16Rik, 5730544D12Rik, AA959850	protein_coding	E010	0.087846	0.661808	E009	0.0485521	0.991504	E010		0.810169	E008	-0.0925266	0.979373
ENSMUSG00000002329	67881	Mdp1	1810034K20Rik, AI035604	protein_coding	E001	-0.0485882	0.751289	E003	0.0920037	0.881138	E002		0.999975	E003	-0.0880836	0.921092
ENSMUSG00000002332	52585	Dhrs1	1110029G07Rik, AW112170, D14Ertd484e	protein_coding	E015	0.489092	0.372098	E015	0.499026	0.565444	E010		0.781545	E015	0.441471	0.851334									0.03	0.21
ENSMUSG00000002341	13004	Ncan	C230035B04, Cspg3, Cspg3-rs, Tgfbit	protein_coding
ENSMUSG00000002342	234371	Tmem161a	AI428876, BB161850, BC021367	protein_coding	E012	0.274576	0.480648	E019	-0.134959	0.915937	E005		0.882892	E027	-0.28503	0.536644	0	0.05			0.22	1.28	0	0.05																							0.03	0.13	-0.05
ENSMUSG00000002343	76813	Armc6	2410153K17Rik, AW554412	protein_coding	E007		0.783374	E003		0.697597	E004		0.881771	E003		0.791199
ENSMUSG00000002345	17259; 72368	2310045N01Rik	AI451606	protein_coding	ENSMUSG00000079033+ENSMUSG00000002345:E011	0.441181	0.640535	ENSMUSG00000079033+ENSMUSG00000002345:E005	-0.126879	0.943177	ENSMUSG00000079033+ENSMUSG00000002345:E008		0.546419	ENSMUSG00000079033+ENSMUSG00000002345:E013	0.0674038	0.971972			0.03	0.14
ENSMUSG00000002346	73095	Slc25a42	2900084M01Rik	protein_coding	E010		0.243879	E005		0.78429	E005		0.997037	E001		0.999937													0.12	0.71	0.01	0.62
ENSMUSG00000002365	66616	Snx9	2700073N08Rik, SDP1, SH3PX1	protein_coding	E001	-0.118823	0.684893	E009	-0.0691846	0.884854	E012	0.0597568	0.929099	E008	-0.095055	0.825631
ENSMUSG00000002372	71810	Ranbp3	2610024N24Rik, AA408221	protein_coding	E010	0.136832	0.407765	E001	-0.276688	0.612726	E002	-0.251584	0.574454	E010	0.112679	0.833418
ENSMUSG00000002379	69875; 239760	Ndufa11	2010012C24Rik, AV006275, B14.7	protein_coding	E004	0.0644295	0.743598	E004	0.0762139	0.868134	E004		0.532867	E004	0.0853244	0.811107
ENSMUSG00000002384	12164	Bmp8b	Op3	protein_coding
ENSMUSG00000002393	13864	Nr2f6	AV090102, COUP-TF3, EAR2, Erbal2	protein_coding	E021		0.842856	E019		0.969475	E002		0.958671	E006		0.987362															0.03	0.19																	-0.31
ENSMUSG00000002395	67023	Use1	2010315L10Rik, 5730403H22Rik, AV002165, D12, Ed2, p31, Q-snare	protein_coding	E024	-0.457956	0.41721	E024	-0.473366	0.349848	E026	0.0718775	0.507234	E024	-0.460244	0.381417											0.04	0.17																					-0.12
ENSMUSG00000002396	77090	Ocel1	9430098E02Rik, AI326022, AI593544	protein_coding	E004	0.236307	0.647673	E010		0.933792	E005		0.933389	E006	0.166388	0.882958
ENSMUSG00000002409	13549	Dyrk1b	Mirk	protein_coding	E017		0.227216	E016		0.432487	E016		0.531138	E007		0.725199
ENSMUSG00000002413	109880	Braf	9930012E13Rik, AA120551, AA387315, AA473386, B-raf, Braf-2, Braf2, C230098H17, C87398, D6Ertd631e	protein_coding	E001	-0.099844	0.0339637	E022	0.239872	0.918088	E023		0.821775	E012	-0.193009	0.90623			0.04	0.16											-0.09	0.37
ENSMUSG00000002416	68198	Ndufb2	1810011O01Rik, 8kDa, AGGG, AI325567, CI-AGGG	protein_coding	ENSMUSG00000002416+ENSMUSG00000046947:E020	-0.210617	0.0554474	ENSMUSG00000002416+ENSMUSG00000046947:E008	0.222761	0.574564	ENSMUSG00000002416+ENSMUSG00000046947:E004		0.357215	ENSMUSG00000002416+ENSMUSG00000046947:E020	-0.188806	0.481592																									0.08	0.35
ENSMUSG00000002428	20585	Hltf	AF010600, BC057116, P113, Smarca3, Snf2l3	protein_coding	E034	-0.619239	4.72266e-05	E014	-0.186463	0.78429	E018		0.627779	E034	-0.381179	0.497659
ENSMUSG00000002455	68879	Prpf6	1190003A07Rik, 2610031L17Rik, ANT-1, U5-102K	protein_coding	E017	-0.796021	0.594146	E009	-0.0756064	0.982016	E020	-0.103683	0.884561	E023	0.141206	0.863452
ENSMUSG00000002458	56470	Rgs19	2610042F04Rik, AI324841, AW547781, GAIP	protein_coding	E025	-1.51977	0.21168	E009	-0.323703	0.63921	E011	-0.0625316	0.868898	E019	-0.1198	0.712148	-0.01	0	-0.01	0	-0.01	0	-0.01	0
ENSMUSG00000002459	58175	Rgs20	2900073E09Rik, Rgsz1	protein_coding
ENSMUSG00000002475	106861	Abhd3	AA675331, LABH3	protein_coding	E003	0.128404	0.733681	E012	-0.167701	0.843805	E003		0.978839	E005	0.141636	0.757223																																	0
ENSMUSG00000002477	20641; 100043882	Snrpd1	AA407109, AL023031, SMD1	protein_coding	E001	-0.0452737	0.911855	E001	-0.0326984	0.998489	E001		0.998349	E001	-0.0487009	0.978667
ENSMUSG00000002486	77832	Tchp	A930031F18Rik, AV279199	protein_coding	E006		0.702474	E011		0.774577	E008		0.83011	E023		0.867982											0.05	0.38	0.1	0.47
ENSMUSG00000002489	21844	Tiam1	AI847750, D16Ium10, D16Ium10e	protein_coding	E036		0.862572
ENSMUSG00000002496	22084	Tsc2	Nafld, Tcs2	protein_coding	E028	0.230325	0.103411	E036	0.222287	0.372354	E009	0.0871528	0.597243	E009	0.07639	0.627219							-0.21	47.69			-0.2	1.16	-0.19	2.03	-0.13	0.66																	-0.08
ENSMUSG00000002500	66211	Rpl3l	1110057H16Rik	protein_coding	E009		0.790405	E011		0.893291	E011		0.996167	E011		0.984009
ENSMUSG00000002504	65962	Slc9a3r2	0610011L07Rik, 1200011K07Rik, 2010007A20Rik, E3karp, NHERF-2, Octs2, Sip-1, Sip1, Sryip1, Tka-1	protein_coding	E004		0.687662	E005		0.938903	E003		0.794603	E004		0.9197
ENSMUSG00000002524	67959	Puf60	2410104I19Rik, 2810454F19Rik, SIAHBP1	protein_coding	E003	0.0427545	0.878221	E006	0.110538	0.96083	E002	-0.0634615	0.766919	E008	0.143962	0.927064
ENSMUSG00000002546	99412	Golga2	AW555139, GM130, mKIAA4150	protein_coding	E034	-0.189208	0.253061	E034	-0.156305	0.590643	E034	-0.193946	0.424826	E034	-0.113359	0.830868	0.08	0.34	0.32	3.24	0	0.05			0.07	0.65
ENSMUSG00000002550	22245	Uck1	Umpk, URK1	protein_coding	E001	0.297266	0.467849	E009		0.797441	E004		0.928848	E003	0.234968	0.982255
ENSMUSG00000002565	20259	Scin	adseverin, AW545522	protein_coding
ENSMUSG00000002578	22781	Ikzf4	A630026H08Rik, Eos, Zfpn1a4, Znfn1a4	protein_coding	E006		0.698243																		0.18	0.71	0.08	0.57	-0.03	0.43	0.21	0.8
ENSMUSG00000002580	103742	Mien1	1810046J19Rik, AI463380, Rdx12	protein_coding	E003		0.801506	E001		0.996426	E004		0.999975	E001		0.999937
ENSMUSG00000002588	18979	Pon1	Pon	protein_coding
ENSMUSG00000002602	26362	Axl	AI323647, Ark, Tyro7, Ufo	protein_coding	E002	-0.025325	0.0840031	E017	0.0793096	0.802978	E031	0.0408792	0.23095	E009	0.0166473	0.723094	-0.06	12.51	-0.06	24.96
ENSMUSG00000002603	21803	Tgfb1	TGF-beta1, Tgfb, Tgfb-1, TGFbeta1	protein_coding	E005	-0.0265727	0.502994	E009	-0.017628	0.679936	E005	-0.030604	0.323442	E006	-0.0199068	0.811107
ENSMUSG00000002608	52132	Ccdc97	1200014H14Rik, 2810446P04Rik, AA545218, D7Ertd462e	protein_coding	E017	-0.552926	0.0470229	E025	0.326622	0.815732	E013	0.342962	0.501656	E013	0.363027	0.439356			0.08	0.37			0.12	1.51											0.16	1.17
ENSMUSG00000002617	22700	Zfp40	CTfin12, NTfin12, Zfp-40	protein_coding	E004		0.568263	E004		0.999699	E004		0.999975	E004		0.999937
ENSMUSG00000002625	54194	Akap8l	HAP95, Nakap95	protein_coding	E006	-0.114602	0.829978	E006	0.0851807	0.982363	E004		0.981575	E004	0.17909	0.850077
ENSMUSG00000002633	20423	Shh	9530036O11Rik, Dsh, Hhg1, Hx, Hxl3, M100081	protein_coding
ENSMUSG00000002635	68079	Pdcd2l	6030457N17Rik	protein_coding	E004	-0.142153	0.622709	E004		0.915769	E003		0.969804	E002		0.863983
ENSMUSG00000002658	98053	Gtf2f1	2810405L04Rik, C76800, RAP74	protein_coding	E013	-0.145389	0.558276	E013	-0.115064	0.902044	E013	-0.119061	0.889393	E003	0.137364	0.697616
ENSMUSG00000002660	53895	Clpp	AU019820, D17Wsu160e	protein_coding	E006	-0.0979119	0.547928	E006		0.953913	E005		0.942828	E006	-0.09234	0.857194
ENSMUSG00000002661	66400	Alkbh7	2310045B01Rik, 2510008E23Rik, Abh7, Spata11	protein_coding	E008		0.0379354	E007		0.545285	E007		0.936532	E007		0.548108							-0.07	0.34
ENSMUSG00000002664	19197	Pspn	PSP	protein_coding	E002		0.824585
ENSMUSG00000002668	70785	Dennd1c	4432409M07Rik	protein_coding	E013	0.176476	0.604468	E006	0.271472	0.704123	E005	-0.296688	0.310911	E001	-0.100172	0.740615
ENSMUSG00000002679	69792	Med6	1500012F11Rik, AU019660, AV213303	protein_coding	E006	-1.05111	0.624722	E011		0.890004	E011		0.966708	E011		0.421415
ENSMUSG00000002688	18760	Prkd1	Pkcm, PKD, PKD1, Prkcm	protein_coding
ENSMUSG00000002699	16822	Lcp2	AI323664, BB161688, SLP-76, SLP76, twm	protein_coding	E027	0.671413	0.149862	E004	0.113615	0.312626	E027	0.626437	0.331476	E027	0.517075	0.776294
ENSMUSG00000002718	110750	Cse1l	2610100P18Rik, AA407533, Capts, Cas, Xpo2	protein_coding	E006	0.184529	0.382827	E006	0.210552	0.580169	E002	0.522257	0.214206	E020	0.386362	0.489746	0	0.03	0.05	0.34	0.06	0.4	0.04	0.12
ENSMUSG00000002728	67877	Naa20	1500004D14Rik, 2900026I01Rik, AU041458, D2Ertd186e, Nat5	protein_coding	E021	0.248994	0.127893	E009	0.421455	0.327153	E023		0.904251	E023	-0.0632971	0.926353																																	-0.13
ENSMUSG00000002731	23992	Prkra	AV120107, lear, Pact, PRK, RAX	protein_coding	E007	0.162057	0.737415	E008		0.761309	E002		0.506112	E007	0.220382	0.514064
ENSMUSG00000002732	14231	Fkbp7	23kDa, FKBP-7, FKBP23	protein_coding	E004		0.824243	E004		0.96949	E005		0.953346	E005		0.979392	-0.12	0.78
ENSMUSG00000002733	83435	Plekha3	FAPP1	protein_coding	E007	0.150277	0.630273	E002	-0.183578	0.930742	E008		0.973349	E001	-0.140885	0.988313
ENSMUSG00000002741	56418	Ykt6	0610042I15Rik, 1810013M05Rik, AW105923	protein_coding	E008	0.0496826	0.869368	E004	-0.0512603	0.978542	E002	-0.0906159	0.827539	E001	-0.0523325	0.981018
ENSMUSG00000002748	22385	Baz1b	C87820, Wbscr9, WSTF	protein_coding	ENSMUSG00000080473+ENSMUSG00000002748:E002	0.165658	0.367799	ENSMUSG00000080473+ENSMUSG00000002748:E019	0.104827	0.885702	ENSMUSG00000080473+ENSMUSG00000002748:E001	0.242164	0.203734	ENSMUSG00000080473+ENSMUSG00000002748:E019	0.116882	0.760459
ENSMUSG00000002763	224824	Pex6	AI132582, D130055I09Rik, mKIAA4177	protein_coding	E005	-0.539055	0.751277	E009	0.227837	0.728033	E009		0.757899	E008	-0.1664	0.841116
ENSMUSG00000002767	27398	Mrpl2	CGI-22, MRP-L14, Rpml14	protein_coding	E012	-0.366175	0.790157	E009	-0.0341595	0.98853	E014		0.93517	E008	-0.09925	0.818703																																	-0.01
ENSMUSG00000002768	17256	Mea1	Mea-1	protein_coding	E001	-0.0910622	0.899027	E001	-0.0926154	0.990229	E001		0.993932	E001	-0.0751397	0.999937
ENSMUSG00000002769	14711	Gnmt		protein_coding	E005		0.81732
ENSMUSG00000002771	14814	Grin2d	GluN2D, NMDAR2D, NR2D	protein_coding	E008		0.496598
ENSMUSG00000002778	68137	Kdelr1	8030486F04Rik, AW215843, Erd2.1	protein_coding	E011	0.047955	0.577244	E011	0.0784594	0.349848	E011	0.073753	0.398463	E013	-0.0960542	0.446557																									-0.01	0			0	0
ENSMUSG00000002781	70209	Tmem143	2310076O21Rik, AI481604	protein_coding	E019	0.292344	0.642566	E018		0.629675	E019		0.488677	E019	0.336412	0.682042			0.18	4.49			0.02	0.28
ENSMUSG00000002791		Pdxk-ps		pseudogene
ENSMUSG00000002797	110175	Ggct	A030007L17Rik, AA673177, Gctg, Ggc	protein_coding	E001	-0.477838	0.028742	E001		0.787614	E008		0.999975	E001		0.653279	0	0.04	0.01	0.1	0.01	0.06	0.02	0.1																			-0.06	0.31
ENSMUSG00000002799	16450	Jag2	D12Ggc2e, mJagged2-1, Serh, sm	protein_coding
ENSMUSG00000002803	399566	Btbd6		protein_coding	E003		0.855273	E006		0.690706	E004		0.959986	E005		0.999937
ENSMUSG00000002804	66174	Nudt14	1110030M18Rik	protein_coding	E002		0.920536	E004		0.999675	E003		0.997388	E003		0.944774
ENSMUSG00000002808	105298	Epdr1	AU040950, AV006210, Epdm2, Epdr2, MERP-1, MERP-2, MERP2, Ucc1	protein_coding
ENSMUSG00000002812	14248; 101056523	Flii	3632430F08Rik, Fli1, Fliih	protein_coding	E009	-0.0669126	0.243844	E005	0.157929	0.160608	E005	0.10244	0.623192	E019	0.203155	0.723094																																	-0.08
ENSMUSG00000002814	21975	Top3a		protein_coding	E021	-0.421056	0.169136	E022		0.790109	E012		0.592294	E021	-0.320637	0.580859
ENSMUSG00000002820	235040	Atg4d	9830134P12Rik, APG4-D, Apg4d, Atg4dl, Autl4	protein_coding	E009	-0.119503	0.783039	E002		0.852809	E010		0.882892	E005	0.166004	0.917338
ENSMUSG00000002825	60507	Qtrt1	2610028E17Rik, Tgt	protein_coding	E009		0.630163	E009		0.983091	E009		0.849192	E003		0.740708
ENSMUSG00000002831	57435	Plin4	mKIAA1881, S3-12	protein_coding	E004		0.992367
ENSMUSG00000002833	15193	Hdgfrp2	HRP-2	protein_coding	E010	0.210571	0.282149	E006	0.159282	0.764737	E008		0.618418	E010	0.109062	0.949614																																	-0.39
ENSMUSG00000002835	27221	Chaf1a	AL023013, AL024058, Cac1p, CAF-1	protein_coding	E012	-0.177214	0.386424	E008		0.903671	E011		0.708125	E002	0.343575	0.862376
ENSMUSG00000002844	11544	Adprh	Arh1	protein_coding	E004	-0.0603553	0.941581	E004	-0.0589168	0.999699	E004		0.992018	E002	-0.00756829	0.999937
ENSMUSG00000002845	67846	Tmem39a	2610033C09Rik	protein_coding	E040	-0.535313	0.567427	E015	0.431426	0.727617	E033		0.62646	E033	0.272459	0.783182	0.03	0.12	0.02	0.09			-0.01	0.06
ENSMUSG00000002846	76916	Timmdc1	2810021C21Rik, 4930455C21Rik, AV135763	protein_coding	E004	0.201812	0.750951	E004		0.73909	E001		0.894138	E008		0.974823
ENSMUSG00000002847	85031	Pla1a	AA986889, Ps-pla1, Pspla1	protein_coding
ENSMUSG00000002870	17216	Mcm2	AA959861, AW476101, BM28, CDCL1, Mcmd2, mKIAA0030	protein_coding	E001	-0.210039	0.0078832	E002	0.148416	0.790109	E001		0.313039	E005	0.176175	0.80284
ENSMUSG00000002871	24100	Tpra1	40kDa, Gpr175, Tpra40	protein_coding	E048	0.572262	0.671739	E046	0.113001	0.90835	E050	-0.238296	0.206508	E050	-0.144799	0.716148	0.01	0.03	0.11	0.64	0.06	0.83	0.06	1											0.11	0.45					0.02	0.07	0.02	0.07	0	0.06	0.01	0.05
ENSMUSG00000002881	17936	Nab1		protein_coding	E001	-0.0871957	0.219743	E003	-0.129454	0.846858	E003		0.623192	E001	-0.0634531	0.672357	-0.01	0.03	-0.01	0.05	0	0.04	-0.01	0.04
ENSMUSG00000002885	26364	Cd97	AA409984, TM7LN1	protein_coding	E035	-1.02423	0.541099	E029		0.522837	E005		0.877925	E003		0.926129	0.39	37.09	0.3	4.56	0.61	54.33	0.52	206.7
ENSMUSG00000002897	16172	Il17ra	AW538159, Cdw217, Il17r, VDw217	protein_coding	E004	-0.0535408	0.679915	E004	-0.048086	0.774577	E005	-0.0369177	0.687736	E010	0.0439543	0.979572
ENSMUSG00000002900	16777	Lamb1	C77966, C80098, C81607, D130003D08Rik, Lamb-1, Lamb1-1	protein_coding
ENSMUSG00000002908	84036	Kcnn1	AI854248, KCa2.1, SK1	protein_coding
ENSMUSG00000002910	70807	Arrdc2	4632416I05Rik, Ilad1	protein_coding	E007	0.303088	0.431476	E005		0.349848	E008		0.999975	E007	0.236534	0.761903
ENSMUSG00000002930	19051	Ppp1r17	Gsbs, Ppp1r2	protein_coding
ENSMUSG00000002944	12491	Cd36	FAT, GPIV, Scarb3	protein_coding	E001	-0.134591	0.0201711	E014	-0.0846493	0.847072	E013	0.0629475	0.897322	E012	0.0892867	0.686157	0.01	0	0.01	0.03	0.01	0.03	0.01	0
ENSMUSG00000002948	26400	Map2k7	5930412N11Rik, JNKK 2, Jnkk2, MAPKK 7, Mapkk7, MEK 7, Mek7, Mkk7, Prkmk7, sek2	protein_coding	ENSMUSG00000089736+ENSMUSG00000002948:E017	0.243643	0.13141	ENSMUSG00000089736+ENSMUSG00000002948:E017	0.255918	0.267712	ENSMUSG00000089736+ENSMUSG00000002948:E027		0.400676	ENSMUSG00000089736+ENSMUSG00000002948:E018	0.224596	0.693433	-0.01	0.04	-0.01	0.04	-0.01	0.04	-0.01	0.03	-0.13	0.57			-0.18	0.84	-0.01	0.04
ENSMUSG00000002949	21856	Timm44	0710005E20Rik, D8Ertd118e, Mimt44, Tim44	protein_coding	E007	0.189617	0.279256	E010	0.439257	0.552202	E026		0.443084	E011	0.391444	0.499352
ENSMUSG00000002957	11772	Ap2a2	2410074K14Rik, Adtab, AF006990, AW146353, C78001, L25	protein_coding	E020	-0.137553	0.239192	E020	-0.0834176	0.606941	E020	-0.0939973	0.491832	E021	-0.116902	0.196016
ENSMUSG00000002963	59047	Pnkp	1810009G08Rik, PNK	protein_coding	E020	-0.161835	0.493429	E041	-0.190078	0.490317	E033	0.136146	0.547911	E009	-0.330264	0.389831	-0.01	0.06	0	0.03	-0.03	0.1	0	0.03																					0.02	0.4			0
ENSMUSG00000002968	75613	Med25	2610034E13Rik, 2610529E18Rik, ESTM2, X83308	protein_coding	E005	-0.0819588	0.740551	E004	0.19385	0.619078	E008	-0.125066	0.877978	E009	0.11222	0.841577			-0.07	0.25
ENSMUSG00000002980	57278	Bcam	1200005K12Rik, B-CAM, Gplu, Lu	protein_coding	E010	5.43272	0.219524	E015	-0.253112	0.746282	E020		0.868504	E015	-0.261167	0.812203
ENSMUSG00000002981	56457	Clptm1	HS9, N14	protein_coding	E010	-0.0912118	0.43998	E002	0.0812777	0.684724	E001	0.0973198	0.485156	E011	0.0572112	0.836825
ENSMUSG00000002983	19698	Relb	shep	protein_coding	E008	0.237316	0.100264	E009	0.328419	0.524788	E009		0.778914	E002	-0.0933655	0.882284			-0.01	0.06			0	0.07																									0.03
ENSMUSG00000002984	53333	Tomm40	AW539759, Mom35, Tom40	protein_coding	E004	-1.86494	0.227268	E008	-0.66225	0.778643	E014		0.970699	E005	-0.120908	0.795892
ENSMUSG00000002985	11816	Apoe	AI255918	protein_coding	E010	-1.28711	0.365343	E006	0.125691	0.921168	E006	0.0920507	0.91476	E004	-0.0541121	0.928796							0.03	0.11
ENSMUSG00000002992	11813	Apoc2		protein_coding	ENSMUSG00000002992+ENSMUSG00000074336:E006		0.954352	ENSMUSG00000002992+ENSMUSG00000074336:E002		0.999699	ENSMUSG00000002992+ENSMUSG00000074336:E002		0.999975	ENSMUSG00000002992+ENSMUSG00000074336:E002		0.961015
ENSMUSG00000002996	73389	Hbp1	1700058O05Rik, BE629963, C330012F01Rik, C86454	protein_coding	E022	1.75761	0.175301	E013	0.138491	0.544425	E010	0.171961	0.217241	E010	0.0983557	0.727167
ENSMUSG00000002997	19088	Prkar2b	AI451071, AW061005, Pkarb2, PKARIIbeta, RII(beta)	protein_coding	E003	-0.156599	4.867e-06	E004	0.0571383	0.779922	E015	0.10647	0.214939	E007	0.0640748	0.500915
ENSMUSG00000003031	12576	Cdkn1b	AA408329, AI843786, Kip1, p27, p27Kip1	protein_coding	E004	-0.250403	0.167351	E004	-0.0645622	0.947318	E001		0.483358	E004	-0.167736	0.740212
ENSMUSG00000003032	16600	Klf4	EZF, Gklf, Zie	protein_coding	E005	0.0562735	0.38764	E005	0.0647016	0.518703	E007	0.25912	0.972003	E005	0.0627207	0.474788
ENSMUSG00000003033	11767	Ap1m1	AA408894, Adtm1A, AP47, Cltnm, mu1A, [m]1A	protein_coding	E006	0.104588	0.678434	E009	0.176382	0.230565	E014	-0.114666	0.689672	E017	-0.104038	0.530952													-0.06	0.49
ENSMUSG00000003037	17274	Rab8a	AA409338, Mel	protein_coding	E004	-0.0437629	0.548651	E007	0.0364264	0.938454	E003	-0.0633259	0.887283	E004	-0.0598024	0.675856
ENSMUSG00000003038	15331; 627375; 671242; 100503799	Hmgn2	HMG-17, Hmg17	protein_coding	E037	-0.65658	0.0641764	E004	-0.0632763	0.327937	E025	0.607835	0.199837	E025	0.504845	0.47856											0.01	0.11			-0.01	0.05
ENSMUSG00000003039	67922	Fam32a	2510049I19Rik, AW822030, OTAG-12, Otag12	protein_coding	E001	-0.0157477	0.990704	E002	-0.0515414	0.866506	E001		0.999975	E003	-0.00942478	0.999937
ENSMUSG00000003051	13710	Elf3	ESE-1, ESX, jen	protein_coding
ENSMUSG00000003053	13095	Cyp2c29	Ah-2, Ahh-1, AHOH, AHOHase, AI159681, AI196010, Cyp2c, P450-2C	protein_coding
ENSMUSG00000003062	76205	Stard3nl	0610035N01Rik, 6530409L22Rik, AW124774, MENTHO	protein_coding	E002	0.117312	0.746437	E003	0.204715	0.62109	E007		0.768934	E002	0.163642	0.795892
ENSMUSG00000003068	20869	Stk11	AA408040, Lkb1, mLKB1, Par-4, R75140	protein_coding	E001	0.201706	0.273485	E001	0.254619	0.733544	E001	0.246309	0.569989	E023	0.119989	0.565462	0.08	4.47					0.09	13.98	-0.04	0.43
ENSMUSG00000003070	13637	Efna2	CEK7L, Elf1, Epl6, Eplg6, Lerk6	protein_coding	E004		0.701819	E004		0.915718	E004		0.639532	E004		0.895406
ENSMUSG00000003072	66043	Atp5d	0610008F14Rik, 1500000I11Rik, AA960090, AI876556, AU020773, C85518	protein_coding	E011	0.0198688	0.748481	E011	0.0332409	0.750203	E011	0.0406186	0.669128	E008	-0.0836863	0.88058	0.02	0.37	0	0	0.01	0.14	0	0
ENSMUSG00000003099	19060	Ppp5c	AU020526, PP5	protein_coding	E007	0.09709	0.634777	E007	0.113923	0.824259	E005	-0.10637	0.851805	E007	0.108304	0.838477	0	0	0.01	0	0	0	0.01	0
ENSMUSG00000003119	69131	Cdk12	1810022J16Rik, AI646528, Crk7, Crkrs, D11Ertd752e, Pksc	protein_coding	E020	0.696777	0.0662341	E013	0.288189	0.351266	E008	-0.185029	0.654401	E030	0.140091	0.739398
ENSMUSG00000003123	16890; 101055998	Lipe	4933403G17Rik, HSL	protein_coding	E003		0.723484	E006		0.671004	E011		0.904762	E004		0.733079
ENSMUSG00000003131	18475	Pafah1b2	AI747451, AU021353, mus[b], Pafahb	protein_coding	E001	-0.0336456	0.808218	E001	-0.019603	0.975303	E005	0.0865312	0.901071	E001	-0.0306434	0.919452
ENSMUSG00000003134	54610	Tbc1d8	AD3, HBLP1, VRP	protein_coding	E006		0.33213
ENSMUSG00000003135	52846	D1Bwg0212e	2410015L18Rik, C40, D1Bwg0212e	protein_coding	E003	0.215827	0.487272	E011	-0.3575	0.415645	E003		0.443084	E010	0.0506711	0.958522
ENSMUSG00000003153	20527	Slc2a3	AA408729, AL023014, AL024341, AU040424, C78366, Glut-3, Glut3	protein_coding	E016		0.679535
ENSMUSG00000003154	60611	Foxj2	Fhx	protein_coding	E014	0.0558514	0.660028	E014	0.064301	0.758011	E009	-0.104135	0.717268	E005	0.0498268	0.971168
ENSMUSG00000003161	109552	Sri	2210417O06Rik, 2900070H08Rik, Sor	protein_coding	E017	-0.0966168	0.277047	E005	-0.128646	0.54287	E006	0.0584827	0.772005	E013	0.0378375	0.88075
ENSMUSG00000003166	13356	Dgcr2	9930034O06Rik, DGS-C, Dgsc, Idd, Lan, mKIAA0163, Sez12	protein_coding	ENSMUSG00000090236+ENSMUSG00000092470+ENSMUSG00000003166:E013	-0.915884	0.000245961	ENSMUSG00000090236+ENSMUSG00000092470+ENSMUSG00000003166:E013	-0.533211	0.153538	ENSMUSG00000090236+ENSMUSG00000092470+ENSMUSG00000003166:E026	0.390948	0.203171	ENSMUSG00000090236+ENSMUSG00000092470+ENSMUSG00000003166:E013	-0.510793	0.274549			0	0.03
ENSMUSG00000003178	194401	Mical3	C130040D16Rik, Mical-3, mKIAA1364	protein_coding	E004	0.27395	0.80263	E017	-0.140306	0.76204	E011		0.441215	E003	-0.146928	0.885966
ENSMUSG00000003184	54131	Irf3	C920001K05Rik, IRF-3	protein_coding	E017	-0.559328	0.111996	E016	0.0573118	0.80636	E016	0.0772226	0.566217	E017	-0.358599	0.651837																											0.03	0.38			0.01	0.03
ENSMUSG00000003190	75736	Bcl2l12	2810475P17Rik, 5430429M05Rik, Bcl-L12, Bcl2-L12	protein_coding	E005		0.267691	E002		0.97307	E015		0.925296	E002		0.985219
ENSMUSG00000003198	224893	Zfp959		protein_coding	E004		0.824025	E002		0.913393	E004		0.983514	E004		0.999937
ENSMUSG00000003199	68047	Mpnd	E130307M08Rik	protein_coding	E030	0.811593	0.089315	E030	0.641439	0.54287	E016	-0.206081	0.72977	E022	0.0957819	0.913236	0	0.03	0.02	0.08	0	0.02	0	0.02																									0
ENSMUSG00000003200	20405	Sh3gl1	C77078, EEN, Sh3d2b, SH3P8	protein_coding	E002	0.0892943	0.624342	E009	0.0805567	0.916987	E005		0.85995	E006	0.0943625	0.866649	0.03	0.18	0	0	0.01	0.03	0	0
ENSMUSG00000003206	50498	Ebi3	EBI-3, IL-27	protein_coding	E001		0.796963	E001		0.843563	E001		0.911319	E001		0.975828
ENSMUSG00000003208	72886	Ccdc94	2900016D05Rik, AI413813	protein_coding	E006		0.750997	E003		0.978542	E003		0.991434	E006		0.941067
ENSMUSG00000003226	19386	Ranbp2	A430087B05Rik, AI256741, NUP358	protein_coding	E016	-0.208861	0.29882	E009	0.172739	0.510895	E016	-0.213029	0.563654	E027	0.0812038	0.859898
ENSMUSG00000003227	13608	Edar	dl, ED1R, ED3, ED5, EDA-A1R, EDA3	protein_coding
ENSMUSG00000003228	14773	Grk5	Gprk5	protein_coding	E016	-0.0661633	0.751688	E010	-0.20276	0.425638	E012	0.0865102	0.751038	E009	-0.205513	0.487082
ENSMUSG00000003233	13544	Dvl3		protein_coding	E011	0.266278	0.383753	E011	0.302905	0.595032	E011		0.0975923	E011	0.25813	0.497659
ENSMUSG00000003234	27406	Abcf3	AI326318, AU016058, BB119416	protein_coding	E024	0.313483	0.211188	E025	0.25977	0.611113	E007	-0.198599	0.579859	E025	0.166812	0.926953
ENSMUSG00000003235	224045	Eif2b5	C81315	protein_coding	E015	0.278925	0.316846	E011	-0.189583	0.373375	E015		0.794198	E013	-0.139921	0.734783
ENSMUSG00000003269	19158	Cyth2	ARNO, CLM2, Pscd2	protein_coding	E009	0.277397	0.653893	E006	0.0794525	0.870895	E012		0.875461	E019	-0.104601	0.869395																									-0.01	0.05			-0.01	0.05	-0.23	26.54	0.45
ENSMUSG00000003271	54200	Sult2b1	AI326997, BB173635, ST2B1, SULT2B	protein_coding	E012		0.325621	E002		0.655925	E008		0.999975	E009		0.999937
ENSMUSG00000003273	12348	Car11	Ca11	protein_coding	E002		0.718176
ENSMUSG00000003279	224997	Dlgap1	4933422O14Rik, 9630002F18, AI845682, AI848168, BB075781, D17Bwg0511e, Gkap, GKAP/SAPAP, GKPA/SAPAP, mKIAA4162, Sapap1	protein_coding
ENSMUSG00000003282	56711	Plag1		protein_coding	E002		0.683062	E001		0.999699	E001		0.942899	E001		0.999937
ENSMUSG00000003283	15162	Hck	AI849071, Bmk	protein_coding	E009	-0.0766148	0.029564	E002	0.0788805	0.425208	E002	0.0967128	0.372269	E009	-0.0425976	0.804813
ENSMUSG00000003299	66163	Mrpl4	1110017G11Rik	protein_coding	E009	-0.0514746	0.801353	E001	0.0960775	0.982125	E003	-0.0548714	0.929207	E007	-0.0561358	0.934796
ENSMUSG00000003308	50868	Keap1	INRF2, mKIAA0132	protein_coding	E004	0.069468	0.740919	E004	0.128735	0.774727	E007		0.836361	E007	-0.401296	0.487837																											0.12	7.37
ENSMUSG00000003309	11768	Ap1m2	D9Ertd818e, mu1B, [m]1B	protein_coding
ENSMUSG00000003316	20340	Glg1	AI593353, AW537898, CFR, CFR-1, ESL-1, MG-160, MG160, Selel	protein_coding	E007	-0.40743	0.781003	E022	-0.135654	0.435468	E021	-0.0767381	0.908295	E015	0.0999554	0.885966			0	0	-0.01	0	0	0
ENSMUSG00000003341	67331	Atp8b3	1700042F02Rik, 1700056N23Rik, ATPIK, SAPLT	protein_coding
ENSMUSG00000003344	208198	Btbd2	2610037C03Rik, 4930512K17Rik	protein_coding	E005	-0.904937	0.0130321	E013	0.125411	0.816252	E006	-0.120319	0.732584	E016	0.179805	0.631352
ENSMUSG00000003345	103236	Csnk1g2	2810429I12Rik, AI463719	protein_coding	E013	0.0589917	0.816046	E006	0.253917	0.790109	E009	0.0739615	0.817414	E009	0.075288	0.762269													-0.06	0.26
ENSMUSG00000003346	216169	Fam108a	1700013O15Rik, BC005632, D10Bwg1364e, Fam108a	protein_coding	E005	0.239413	0.827831	E001	0.0306036	0.899605	E005		0.698986	E003	0.0519059	0.936165
ENSMUSG00000003348	208228	Mob3a	5330417K06Rik, A630029F06, AV218468, Mobkl2a	protein_coding	E003	0.0346674	0.629625	E002	-0.0433184	0.933429	E004		0.984076	E002	-0.0291399	0.993902
ENSMUSG00000003352	12297	Cacnb3	Beta3, Cchb3	protein_coding	E005		0.752645	E014		0.999699	E014		0.875686	E014		0.981123
ENSMUSG00000003354	105833	Ccdc65	4933417K04Rik, AI428139, AU020178, NYD-SP28	protein_coding	E004		0.752645
ENSMUSG00000003355	66120	Fkbp11	1110002O23Rik, FKBP-11	protein_coding	E001		0.930214	E006		0.999699
ENSMUSG00000003360	74351	Ddx23	3110082M05Rik, 4921506D17Rik	protein_coding	E020	-0.405566	0.374335	E022	-0.196414	0.239838	E021	-0.143795	0.868979	E020	-0.402393	0.572861
ENSMUSG00000003363	18807	Pld3	Sam-9	protein_coding	E026	0.349117	0.0511109	E010	0.0306574	0.424368	E017	-0.027483	0.629239	E011	0.0535848	0.864062	0	0	0	0	0.14	0.8	0.09	0.5															0.02	0.09
ENSMUSG00000003378	14809	Grik5	GluK5, GluRgamma2, KA2	protein_coding	E018		0.570132
ENSMUSG00000003379	12518	Cd79a	Ig-alpha, Iga, Igalpha, Ly-54, Ly54, mb-1	protein_coding
ENSMUSG00000003380	14470	Rabac1	2310040I06Rik, Gbpap1, PRA1, prenylin	protein_coding	E001	0.0436431	0.861882	E005	-0.0136867	0.999699	E003	-0.041508	0.919774	E005	-0.0465772	0.989745
ENSMUSG00000003382	27049	Etv3	AI414410, METS, Pe1	protein_coding	E009	1.18575	0.199714	E005	-0.476043	0.673481	E012		0.893397	E006	0.435269	0.863983
ENSMUSG00000003402	19089	Prkcsh	80K-H	protein_coding	E001	-0.126819	0.58481	E002	-0.139573	0.791277	E001	-0.177068	0.623192	E001	-0.317611	0.0291343
ENSMUSG00000003410	15571	Elavl3	2600009P04Rik, Huc, mHuC, PLE21	protein_coding
ENSMUSG00000003411	69908	Rab3b	2610528C18Rik	protein_coding
ENSMUSG00000003418	241230	St8sia6	1700007J08Rik, AI314453, AI875066, Siat8f, ST8SiaVI	protein_coding
ENSMUSG00000003420	14132	Fcgrt	FcRn	protein_coding	E002	-0.0136547	0.959045	E006	0.030571	0.80004	E001	0.0507239	0.897248	E005	0.0169663	0.971896																											0.04	0.73
ENSMUSG00000003421	66394	Nosip	2310061K06Rik, CGI-25	protein_coding	E012	-0.541418	0.559416	E024	0.16293	0.933255	E013		0.63663	E024	0.239139	0.919452
ENSMUSG00000003423	68845	Pih1d1	1110061L23Rik, 4933413A04Rik, Nop17	protein_coding	E012	-0.34038	0.0541723	E013	-0.223636	0.36116	E012		0.173134	E016	0.199205	0.305868																									0.06	0.32
ENSMUSG00000003429	27207	Rps11		protein_coding	E001	0.0427171	0.637349	E001	0.0326082	0.912797	E003	-0.0207305	0.744976	E001	0.0496698	0.767638
ENSMUSG00000003435	20924	Supt5h	AL033283, AL033321, AU019549, Spt5, Supt5h	protein_coding	E007	0.0739226	0.612192	E012	0.103769	0.51239	E020	0.0596813	0.770595	E006	-0.0651983	0.911502	-0.02	0.11
ENSMUSG00000003436	13389	Dll3	pu, pudgy	protein_coding
ENSMUSG00000003437	54624	Paf1	5730511K23Rik, AA675045	protein_coding	E004	0.176404	0.293874	E030	0.0932649	0.899519	E006	0.152116	0.823891	E018	-0.136974	0.888366
ENSMUSG00000003438	66525	Timm50	2810403L02Rik, AU015082, TIM50L	protein_coding	E001	0.14582	0.511193	E007	-0.187073	0.756078	E006		0.874406	E006	0.0744949	0.883671
ENSMUSG00000003444	67224	Med29	2810405O22Rik, AU020902, Ixl	protein_coding	E001		0.905859	E001		0.993625	E003		0.976605	E001		0.974987
ENSMUSG00000003452	12121	Bicd1	B830009D06Rik, mKIAA4125	protein_coding	E024		0.613626	E008		0.915393	E009		0.902749	E009		0.999937			0.32	1.53	0.19	1.17	0.35	1.7
ENSMUSG00000003458	59287	Ncstn	9430068N19Rik, AA727311, Aph2, D1Dau13e, Kiaa0253, mKIAA0253, Nct	protein_coding	E023	-1.43562	0.270257	E006	-0.0786105	0.906844	E019	-0.0495458	0.922369	E013	0.153956	0.774496	0.01	0	0	0	0.02	0.05	0.03	0.17
ENSMUSG00000003464	19298	Pex19	Pxf	protein_coding	E013	0.12546	0.614412	E005	0.099168	0.84765	E013		0.97576	E013	0.115	0.762494
ENSMUSG00000003469	105653	Phyhip	AW049870, C630010D02Rik, Lnap1ip, PAHX-AP#1, PAHX-AP1	protein_coding
ENSMUSG00000003476	12922	Crhr2	CRF-R2, Crfr2, CRFR2alpha, CRFR2beta	protein_coding
ENSMUSG00000003477	21743	Inmt	Temt	protein_coding
ENSMUSG00000003484	72054	Cyp4f18	1810054N16Rik, Cyp4f3, Cypf18	protein_coding	E015	0.115384	0.443503	E015	0.10138	0.396157	E014	0.0908748	0.857057	E002	-0.126416	0.702005																									0	0	0.01	0.05	0	0	-0.01	0
ENSMUSG00000003500	23917	Impdh1	B930086D20Rik	protein_coding	E015	0.195868	0.383753	E008	0.143319	0.893291	E008		0.942828	E008	0.166942	0.779325	-0.01	0.12			0.01	0.14																							-0.01	0.06
ENSMUSG00000003505	26438	Psg18	Cea-3, Cea3, mmCGM6	protein_coding
ENSMUSG00000003518	72349	Dusp3	2210015O03Rik, 5031436O03Rik, T-DSP11, VHR	protein_coding	E009	1.39379	0.257812	E007	-0.0521348	0.95722	E011	0.278543	0.810169	E008	0.0508255	0.927032
ENSMUSG00000003526	19125	Prodh	Pro-1, Pro1, Ym24d07	protein_coding	E002		0.464745	E002		0.999675	E002		0.981575	E002		0.945541
ENSMUSG00000003527	27886	Dgcr14	AI462402, D16H22S1269E, Dgcr1, Dgsi, ES2, Es2el	protein_coding	E007	-0.125114	0.79797	E009		0.964239	E008		0.993882	E009	0.231773	0.440193
ENSMUSG00000003528	13358	Slc25a1	1300019P08Rik, 2610100G11Rik, AI194714, Ctp, Dgsj, Slc20a3	protein_coding	E005	0.102926	0.299514	E001	-0.0866221	0.520894	E002	-0.126688	0.711447	E001	-0.102871	0.389725																									0.01	0	0	0	0	0	0	0
ENSMUSG00000003531	13353	Dgcr6	AU044152	protein_coding	ENSMUSG00000089979+ENSMUSG00000003531:E016	0.390029	0.419237	ENSMUSG00000089979+ENSMUSG00000003531:E013		0.218414	ENSMUSG00000089979+ENSMUSG00000003531:E020		0.208374	ENSMUSG00000089979+ENSMUSG00000003531:E016		0.883671
ENSMUSG00000003534	12305	Ddr1	6030432F18, AI323681, Cak, CD167a, Nep, PTK3A	protein_coding
ENSMUSG00000003541	15937	Ier3	AI663993, cI-3, gly96, IEX-1	protein_coding	E002	-0.0284099	0.962562	E002		0.999731	E002		0.985878	E002		0.997023
ENSMUSG00000003545	14282	Fosb		protein_coding	E003	0.241215	0.646671	E002		0.967422	E003		0.915491	E003		0.781125
ENSMUSG00000003546	74764	Klc4	1200014P03Rik, AA408085, AW146303, Knsl8	protein_coding	E001	0.122062	0.504881	E004	-0.0836104	0.943901	E001		0.671732	E004	-0.103263	0.899592
ENSMUSG00000003549	13870	Ercc1	Ercc-1	protein_coding	E020	0.239083	0.463501	E018	0.188271	0.874974	E029		0.93543	E012	-0.232315	0.646456											0.16	0.83	0.16	0.89
ENSMUSG00000003555	13074	Cyp17a1	Cyp17, p450c17	protein_coding
ENSMUSG00000003559	57344	As3mt	2310045H08Rik, Cyt19	protein_coding	E005	-0.255771	0.421808	E005		0.680287	E007		0.889629	E005		0.79916																													0.22	10.1	0.07	0.32
ENSMUSG00000003573	26558	Homer3	AW146114	protein_coding	E015	-0.172925	0.534476	E016		0.600939	E004		0.86525	E006		0.626354																																	0
ENSMUSG00000003575	382056	Crtc1	AI413414, Mect1, mKIAA0616, R74955, TORC1	protein_coding	E005	0.342885	0.732582	E022		0.59263	E018		0.527129	E007		0.88607											-0.01	0.22	0.11	0.52	-0.02	0.17
ENSMUSG00000003581	71673	Rnf215	0610009J22Rik, AW557025, C77903	protein_coding	E008	-0.345566	0.438498	E015		0.56084	E009		0.872827	E004	0.235491	0.851334					-0.02	0.19
ENSMUSG00000003585	67815	Sec14l2	1300013M05Rik, Spf, TAP	protein_coding	E018	-0.336256	0.145103	E018	-0.203954	0.522185	E001	0.0645512	0.946389	E006	-0.121101	0.791349	0.04	0.11	0.01	0.05	0.05	0.67	0.01	0.04
ENSMUSG00000003604	74268	Aven	1700013A01Rik, 1700056A21Rik, mAven-L, mAven-S	protein_coding	E009	0.0809888	0.922836	E002		0.857169	E005		0.940298	E006		0.938676
ENSMUSG00000003617	12870	Cp	D3Ertd555e	protein_coding	E051		5.21216e-10
ENSMUSG00000003623	74114	Crot	1200003H03Rik	protein_coding	E007	0.195216	0.372564	E003	0.245852	0.56084	E007		0.375827	E020	-0.396666	0.291098
ENSMUSG00000003644	20111	Rps6ka1	p90rsk, rsk, Rsk1	protein_coding	E023	0.105465	0.536554	E012	0.136663	0.655925	E023	0.121991	0.580539	E017	-0.0760146	0.565739	0	0	0.03	0.09	0	0	0	0																									0
ENSMUSG00000003657	12308	Calb2	CR	protein_coding
ENSMUSG00000003660	320632	Snrnp200	A330064G03Rik, Ascc3l1, BC011390, HELIC2, U5-200-KD, U5-200KD	protein_coding	E006	-0.205579	0.269061	E038	-0.120371	0.574564	E041	-0.130183	0.766919	E002	0.112227	0.793023
ENSMUSG00000003662	26371	Ciao1	AW210570, Wdr39	protein_coding	E001	-0.232642	0.22154	E012	0.182745	0.452683	E012		0.190429	E012	0.194827	0.46624	0.01	0	0.01	0	0	0.03	0	0.03
ENSMUSG00000003665	15116	Has1	HAS	protein_coding	E004		0.929521
ENSMUSG00000003680	225895	Taf6l	2810417N14Rik, BB223262, C530024J06Rik, Paf65a	protein_coding	ENSMUSG00000079437+ENSMUSG00000003680:E001	-0.128287	0.112648	ENSMUSG00000079437+ENSMUSG00000003680:E033	-0.302616	0.0199867	ENSMUSG00000079437+ENSMUSG00000003680:E033	-0.20775	0.358921	ENSMUSG00000079437+ENSMUSG00000003680:E033	-0.14398	0.744707	0.01	0.07	0.01	0.05	0.03	0.08	0	0.04
ENSMUSG00000003721	72999	Insig2	2900053I11Rik, C730043J18Rik, Insig-2	protein_coding	E017	0.26743	0.642757	E001	-0.177657	0.846858	E011		0.759264	E016	0.317009	0.689406	0.01	0.03	0	0.03	0	0.03	0	0.03
ENSMUSG00000003731	16650	Kpna6	IPOA7, Kpna5, NPI-2	protein_coding	E020	-0.175132	0.381558	E005	-0.108632	0.85269	E008	0.124416	0.8528	E009	0.321437	0.201239
ENSMUSG00000003746	17155	Man1a	Man1a1, PCR1	protein_coding	E003	0.330591	0.268655	E018		0.349848	E001		0.368374	E018		0.27146			-0.05	0.19	-0.06	0.21	-0.06	0.17																					0.01	0.16
ENSMUSG00000003752	233011	Itpkc	9130023N17Rik	protein_coding	E006		0.640566	E008		0.715109	E011		0.588609	E008		0.816684
ENSMUSG00000003762	76889	Adck4	0610012P18Rik	protein_coding	ENSMUSG00000063160+ENSMUSG00000003762:E011	-0.206192	0.354221	ENSMUSG00000063160+ENSMUSG00000003762:E012	0.24568	0.597746	ENSMUSG00000063160+ENSMUSG00000003762:E010		0.521134	ENSMUSG00000063160+ENSMUSG00000003762:E004	0.233899	0.683473	-0.15	0.85	-0.35	1.87	0.14	0.7	-0.04	0.72
ENSMUSG00000003778	78656	Brd8	2610007E11Rik, 4432404P07Rik, SMAP	protein_coding	E016	-0.303758	0.177111	E019	-0.322949	0.285575	E017		0.705439	E016	-0.192305	0.86826	-0.02	0.06							0.23	10940.2					0.11	0.96
ENSMUSG00000003779	19348	Kif20a	AA415432, Rab6kifl	protein_coding	E015	-0.210315	0.227569	E015		0.757733	E003		0.782659	E015	-0.131455	0.885391
ENSMUSG00000003808	66590	Farsa	0610012A19Rik, Farsla	protein_coding	E013	-0.284473	0.227671	E015	-0.172367	0.750203	E021	0.492179	0.809853	E012	-0.138734	0.891866																									-0.01	0.05							-0.03
ENSMUSG00000003809	270076	Gcdh	9030411L18, AI266902, D17825, GCD	protein_coding	E004	0.342591	0.329123	E003		0.501939	E003		0.785565	E003	0.397073	0.170172
ENSMUSG00000003810	17776	Mast2	MAST205, Mtssk	protein_coding	E026	-0.285769	0.0195259	E026	-0.262621	0.258193	E027	-0.320309	0.538098	E056	0.188113	0.789091			0.07	0.22			0.03	0.21																									0.02
ENSMUSG00000003812	13423	Dnase2a	Dnase2	protein_coding	E025	-0.932801	0.354523	E025	-0.748272	0.658616	E012	-0.0596512	0.642796	E004	0.392972	0.71753	0.01	0	-0.01	0.03	-0.02	0.11	0.01	0	0	0	0	0	0	0	0	0			0.03	0.22	0.05	1.65
ENSMUSG00000003813	19358	Rad23a	2310040P19Rik, AL024030, HR23A, mHR23A	protein_coding	E021	-0.145774	0.0659243	E018	-0.135468	0.235478	E018	-0.0786653	0.768574	E018	-0.0806811	0.674954																									0	0.03	0	0			0	0	0.01
ENSMUSG00000003814	12317	Calr	Calregulin, CRT	protein_coding	E013	-0.102059	0.771116	E011	0.241327	0.2623	E005	-0.0176956	0.748719	E013	-0.0721354	0.978932
ENSMUSG00000003824	71846	Syce2	1700013H19Rik, AA407907, Cesc1	protein_coding	E004	-0.771009	0.432199	E007		0.64413	E007		0.942828	E007		0.549444							0.09	0.41
ENSMUSG00000003847	54446	Nfat5	AI225870, B130038B15Rik, CAG-8, CAG80, mKIAA0827, NFATL1, nfatz, OREBP, TonEBP	protein_coding	E007	-1.94711	0.166546	E025	-0.291575	0.545285	E025		0.225594	E031	0.172862	0.414039	0	0.1	0.31	6.43	-0.01	0.07
ENSMUSG00000003848	67619	Nob1	1700021I09Rik, ART-4, Nob1p, Psmd8bp1	protein_coding	E012	0.282119	0.418001	E015		0.829998	E009		0.846963	E012	0.223971	0.861482									0.08	0.33
ENSMUSG00000003849	18104	Nqo1	AV001255, Dia4, Dtd, Nmo-1, Nmo1, Nmor1, Ox-1, Ox1, Qr1	protein_coding	E001		0.660764	E004		0.878707	E001		0.743724	E001		0.783421
ENSMUSG00000003863	76787	Ppfia3	2410127E16Rik	protein_coding	E005		0.700481	E005		0.999564				E005		0.981123
ENSMUSG00000003865	14936	Gys1	Gys3, MGS	protein_coding	E022	0.200484	0.666399	E007	-0.175092	0.893291	E008		0.833624	E007	-0.15813	0.919698	-0.03	0.08
ENSMUSG00000003868	20174	Ruvbl2	mp47, p47	protein_coding	E010	-0.0716012	0.857312	E005	0.0980883	0.893586	E004		0.912509	E017	0.318743	0.884017
ENSMUSG00000003872	22342	Lin7b	LIN-7B, MALS-2, Veli2	protein_coding
ENSMUSG00000003873	12028	Bax		protein_coding	E006	-0.0931493	0.548578	E006	-0.114913	0.869905	E006	0.103594	0.910533	E006	-0.118952	0.795892
ENSMUSG00000003882	16197	Il7r	CD127, IL-7Ralpha	protein_coding	E006		0.729233	E001		1	E001		0.999975	E001		0.999937
ENSMUSG00000003923	21780	Tfam	AI661103, Hmgts, mtTFA, tsHMG	protein_coding	E004	0.105727	0.78314	E004	0.162988	0.665047	E010		0.491832	E010	-0.145294	0.900024
ENSMUSG00000003929	224694	Zfp81	AA409460, AA409461, C330034P10Rik, D330034E10Rik, Hszfp36, KRAB13, Zfp78	protein_coding	E004		0.670251	E001		0.999699	E001		0.973508	E001		0.969582
ENSMUSG00000003934	13643	Efnb3	EFL-6, ELF-3, Elk-L3, Epl8, LERK-8, NLERK-2	protein_coding	E001		1
ENSMUSG00000003948	67468	Mmd	1200017E07Rik, 1810073C06Rik, AA690185	protein_coding	E009	0.889493	0.0018589	E014	0.0992874	0.788942	E009	0.372622	0.816706	E014	0.0846149	0.949387
ENSMUSG00000003949	217082	Hlf	E230015K02Rik	protein_coding
ENSMUSG00000003955	70186	Fam162a	2310056P07Rik, HGTD-P	protein_coding	E002	0.0594053	0.876724	E001		0.893291	E002		0.998162	E001	0.0695491	0.949039
ENSMUSG00000003970	26961	Rpl8		protein_coding	E004	-0.0118542	0.222263	E003	0.00621618	0.99295	E006	0.0219153	0.877393	E004	-0.0131313	0.487082
ENSMUSG00000003974	108069	Grm3	0710001G23Rik, Gprc1c, mGlu3, mGluR3	protein_coding
ENSMUSG00000003992	66970	Ssbp2	1500004K09Rik, 2310079I02Rik, 9330163K02Rik, A830008M03Rik, AU067692, AW558684, Hspc116, SSDP2	protein_coding
ENSMUSG00000004018	67030	Fancl	2010322C19Rik, AW554273, B230118H11Rik, gcd, Phf9, Pog	protein_coding	E020		0.710674	E002		0.952726	E002		0.999975	E006		0.953423	-0.02	0.22	0.01	0.23	-0.01	0.09
ENSMUSG00000004031	240843	Fam5b	6430517E21Rik, BB361039, mKIAA1747	protein_coding
ENSMUSG00000004032	14866	Gstm5		protein_coding	E017		0.511193	E011		0.954158	E012		0.814845	E011		0.767361	0.13	0.53	-0.05	0.37	0.02	0.45	-0.05	0.22
ENSMUSG00000004035	68312	Gstm7	0610005A07Rik, AI894236, Cd203c	protein_coding
ENSMUSG00000004038	14864	Gstm3	Fsc2, mGSTM5	protein_coding
ENSMUSG00000004040	20848	Stat3	1110034C02Rik, Aprf, AW109958	protein_coding	E019	0.209362	0.0351342	E023	0.882677	0.0578507	E023	0.788973	0.667321	E038	-0.09688	0.274606																															0.03	0.15	0
ENSMUSG00000004043	20850	Stat5a	AA959963, STAT5	protein_coding	E018	0.1417	0.219675	E018	0.0827475	0.807865	E008	0.267362	0.57035	E018	0.126005	0.831086	0.08	1.34	0	0.04	-0.01	0.05	0.05	0.35
ENSMUSG00000004044	19285	Ptrf	2310075E07Rik, AW546441, Cav-p60, Cavin	protein_coding	E003		0.974627	E001		0.999564
ENSMUSG00000004054	26403	Map3k11	2610017K16Rik, Mlk3, PTK1, SPRK	protein_coding	E002	0.493818	0.502126	E012	-0.0480756	0.782796	E004	0.0491527	0.965721	E004	0.064041	0.815629					0.01	0	0.01	0
ENSMUSG00000004056	11652	Akt2	2410016A19Rik, AW554154, PKB, PKBbeta	protein_coding	E026	-0.0920658	0.674574	E014	0.108175	0.852392	E027	-0.150901	0.353985	E026	-0.182601	0.411318	-0.04	0.12	0	0.03	-0.07	0.57																											0.01
ENSMUSG00000004069	83945	Dnaja3	1200003J13Rik, 1810053A11Rik, C81173, Tid-1, Tid1l	protein_coding	ENSMUSG00000004069+ENSMUSG00000039646:E021	-0.101373	0.758813	ENSMUSG00000004069+ENSMUSG00000039646:E005	0.215659	0.779922	ENSMUSG00000004069+ENSMUSG00000039646:E020		0.836361	ENSMUSG00000004069+ENSMUSG00000039646:E019	-0.119982	0.775278	0	0	0.01	0.03	0.01	0.04	0	0
ENSMUSG00000004070	15369	Hmox2	HO-2, HO2	protein_coding	E012	0.0473414	0.598924	E011	0.0314254	0.958784	E013	0.0743643	0.743435	E002	-0.0786193	0.942132
ENSMUSG00000004071	66626	Cdip1	2700048O17Rik, 5730403B10Rik, AU018521, AW742692, CDIP	protein_coding	E015	1.13557	0.61611	E013	0.447804	0.67435	E004		0.774268	E005	0.217549	0.710442
ENSMUSG00000004085	65964	B230120H23Rik	AV006891, B230120H23Rik, MLTK, MLTKalpha, MLTKbeta	protein_coding	E005	0.414854	0.750275	E021	-0.102804	0.0865413	E009		0.766919	E021	-0.125787	0.541481
ENSMUSG00000004096	66070	Cwc15	0610040D20Rik, 2900052N06Rik, c11orf5, Ed1, mED1	protein_coding	E007	-0.12391	0.368676	E005	0.0389332	0.986257	E001	0.130105	0.729479	E007	-0.0786705	0.892901
ENSMUSG00000004098	53867	Col5a3		protein_coding
ENSMUSG00000004099	13433	Dnmt1	Cxxc9, Dnmt, Dnmt1o, m.MmuI, MCMT, Met-1, Met1, MommeD2, MTase	protein_coding	E012	-0.0695891	0.404808	E023	0.150967	0.677219	E023	0.145512	0.728723	E023	0.178382	0.392783																											-0.08	0.58	-0.06	0.29
ENSMUSG00000004100	235036	Ppan	A230087P06Rik, SSF1	protein_coding	ENSMUSG00000077702+ENSMUSG00000004100:E006	0.348306	0.0256666	ENSMUSG00000077702+ENSMUSG00000004100:E024	0.233135	0.791399	ENSMUSG00000077702+ENSMUSG00000004100:E006		0.281736	ENSMUSG00000077702+ENSMUSG00000004100:E016	-0.223352	0.431268									0.16	1
ENSMUSG00000004105	26360	Angptl2	AI593246, Arp2, AW260363	protein_coding
ENSMUSG00000004110	12290	Cacna1e	A430040I15, alpha1E, BII, Cach6, Cacnl1a6, Cav2.3, Cchra1	protein_coding
ENSMUSG00000004113	12287	Cacna1b	alpha(1B), AW050276, AW060892, AW822256, Cav2.2, Cchn1a	protein_coding
ENSMUSG00000004127	108943	Trmt10a	3110023L08Rik, AA794508, Rg9mtd2, Rnmtd2	protein_coding	E017		0.488504	E021		0.996119	E021		0.999975	E021		0.999937			-0.35	1.66	-0.34	1.89											0.37	1.59	0.38	1.27
ENSMUSG00000004151	14009; 432800	Etv1	ER81, Etsrp81	protein_coding
ENSMUSG00000004187	16581	Kifc2		protein_coding	E005		0.618807	E018		0.794642	E018		0.999975	E018		0.999937
ENSMUSG00000004207	19156	Psap	AI037048, SGP-1	protein_coding	E011	-0.257086	0.000830893	E011	-0.259208	0.000730548	E012	-0.36462	1.46279e-05	E011	-0.184261	0.0173339	0.01	0	0.01	0	0	0	0.01	0																	0	0	0	0	0	0	0	0	0
ENSMUSG00000004221	16151	Ikbkg	1110037D23Rik, AI848108, AI851264, AW124339, IKK[g], NEMO	protein_coding	E021	0.169239	0.298702	E033	-0.222017	0.634163	E021	0.190502	0.319482	E042	0.0743009	0.923933	0.26	1.63	0.37	29.6	0.3	131.73
ENSMUSG00000004231	18504	Pax2	Opdc, Pax-2	protein_coding
ENSMUSG00000004233	70560	Wars2	5730427B17Rik, 9430020O07Rik, AI413375, TrpRS	protein_coding	E012		0.571991	E005		0.996426	E005		0.488136	E013		0.986717	-0.19	1.11					-0.14	0.69
ENSMUSG00000004263	13498	Atn1	Atr1, atrophin-1, Drpla	protein_coding	ENSMUSG00000089083+ENSMUSG00000072772+ENSMUSG00000004263:E004	-0.186252	0.00433707	ENSMUSG00000089083+ENSMUSG00000072772+ENSMUSG00000004263:E009	0.146106	0.285575	ENSMUSG00000089083+ENSMUSG00000072772+ENSMUSG00000004263:E022	-0.207981	0.57035	ENSMUSG00000089083+ENSMUSG00000072772+ENSMUSG00000004263:E013	-0.246492	0.664585
ENSMUSG00000004264	12034	Phb2	AU044498, BAP, Bap37, Bcap37, REA	protein_coding	ENSMUSG00000004264+ENSMUSG00000088835:E010	-0.350139	0.0659769	ENSMUSG00000004264+ENSMUSG00000088835:E006	-0.137213	0.090896	ENSMUSG00000004264+ENSMUSG00000088835:E026	0.108692	0.690584	ENSMUSG00000004264+ENSMUSG00000088835:E006	-0.131235	0.244439					-0.02	0.05			0.08	8.7992e+08	0.07	28.23													0.04	0.7
ENSMUSG00000004266	15170	Ptpn6	hcp, Hcph, me, motheaten, Ptp1C, SHP-1	protein_coding	E015	-0.382791	0.298574	E034	0.283812	0.837529	E034	0.288658	0.811634	E015	-0.399703	0.780634	0.01	0	0	0	0	0	0	0																	0	0	0	0	0	0	0	0
ENSMUSG00000004267	13807	Eno2	AI837106, D6Ertd375e, Eno-2, NSE	protein_coding	E022		0.845673
ENSMUSG00000004268	14791	Emg1	C2f, Grcc2f	protein_coding	E011	0.0562463	0.80358	E012	-0.106492	0.729402	E002		0.742354	E005	0.0600088	0.923306
ENSMUSG00000004270	14792	Lpcat3	C3f, Grcc3f, Lpcat, Lpeat, Lplat5, Lpsat, Mboat5, Moact5, Oact5, PTG	protein_coding	E015	0.103617	0.190425	E015	0.0871812	0.591575	E013	0.246558	0.887309	E015	0.105959	0.338871	-0.01	0.11	-0.01	0.12			-0.01	0.13
ENSMUSG00000004285	66144	Atp6v1f	1110004G16Rik	protein_coding	E001	-0.0126489	0.901921	E001	-0.0115131	0.997801	E004	-0.00184693	0.999975	E004	0.014671	0.879404					0.01	0
ENSMUSG00000004296	16160	Il12b	Il-12b, Il-12p40, Il12p40, p40	protein_coding	E006		0.329456
ENSMUSG00000004317	12728	Clcn5	5430408K11Rik, ClC-5, Clc5, D930009B12Rik, DXImx42e, Sfc13, T25545	protein_coding	E002	-0.24541	0.72655	E002	-0.201644	0.890578	E005		0.722057	E004	-0.241344	0.740738									0.01	0.09			0.05	0.24													-0.34	1.48
ENSMUSG00000004319	12725	Clcn3	Clc3	protein_coding	E001	-0.320003	0.398082	E008	-0.168902	0.727671	E028		0.916694	E001	-0.206762	0.87023			0.06	0.37
ENSMUSG00000004328	53417	Hif3a	bHLHe17, Ipas, MOP7, NEPAS	protein_coding
ENSMUSG00000004341	75512	Gpx6	1700020G18Rik, olfactory, Ry2d1	protein_coding
ENSMUSG00000004344	14780	Gpx5	Arep, AV379049	protein_coding
ENSMUSG00000004347	18575	Pde1c		protein_coding
ENSMUSG00000004356	70683	Utp20	3830408P06Rik, AA617408, Drim, mDRIM, mDRIN	protein_coding	E040	-0.436483	0.230495	E035	0.435445	0.344025	E048		0.632446	E057	-0.577724	0.530952
ENSMUSG00000004359	20728	Spic	AU019198, C76795, Prf, Spi-C	protein_coding	E007		0.620836	E002		0.994126													-0.24	0.99
ENSMUSG00000004360	212448	9330159F19Rik		protein_coding
ENSMUSG00000004364	26554	Cul3	AI467304, AW146203, mKIAA0617	protein_coding	E003	-0.134493	0.221373	E002	-0.317763	0.216376	E028	0.337744	0.372269	E002	-0.181702	0.806081	0	0.06	0	0	-0.01	0.08	0	0																			0	0.04	0.03	0.1
ENSMUSG00000004366	20604	Sst	Smst, SOM, SRIF, SS	protein_coding
ENSMUSG00000004371	16156	Il11	IL-11	protein_coding	E002		0.365343
ENSMUSG00000004383	16795	Large	BPFD#36, enr, fg, froggy, Gyltl1a, Mbp-1, Mbp1, mKIAA0609, myd	protein_coding	E001	-0.0645182	0.428147	E016	0.134229	0.940271	E016	0.1474	0.893873	E016	0.184397	0.809955	0.09	0.35
ENSMUSG00000004393	52513	Ddx56	2600001H07Rik, D11Ertd619e, Noh61	protein_coding	E007	0.129561	0.623833	E005	-0.204746	0.577225	E013		0.892412	E010	0.114895	0.924593
ENSMUSG00000004394	103694	Tmed4	1110014L17Rik, AI326346	protein_coding	E009	0.109347	0.461669	E003	0.092015	0.742234	E006		0.990471	E001	-0.0679744	0.475314													0.05	0.26
ENSMUSG00000004415	140709	Emid2	9430032K24Rik, BC002218, Col26a, Col26a1, Emu2	protein_coding
ENSMUSG00000004446	12122	Bid	2700049M22Rik, AI875481, AU022477	protein_coding	E008	-0.203735	0.618238	E008		0.980903	E009		0.999611	E008		0.999937
ENSMUSG00000004451	64143	Ralb	5730472O18Rik	protein_coding	E004	0.0606697	0.449665	E004	0.0668791	0.670654	E008	0.040725	0.991434	E004	0.049126	0.88747
ENSMUSG00000004455	19047	Ppp1cc	dis2m1, PP-1G, PP1	protein_coding	E019	0.131007	0.0974709	E019		0.734368	E008		0.247657	E011	-0.462003	0.670611									0	0	0	0.04	-0.07	0.75	0	0									-0.24	0.73					-0.33	1.55
ENSMUSG00000004460	67838	Dnajb11	1810031F23Rik, ABBP-2, AL024055, Dj9, ERdj3, ERj3p	protein_coding	E010	-0.0734936	0.502126	E005	0.0760931	0.698987	E018	0.311392	0.728012	E018	0.346459	0.5972									0.01	0	0	0	0	0	0.01	0
ENSMUSG00000004462	70573	Tbccd1	5730478M09Rik, AU015083, BB165076	protein_coding	E005	0.151164	0.343996	E003		0.767173	E007		0.909435	E007		0.988115
ENSMUSG00000004473	20256	Clec11a	AW457320, Clecsf3, Scgf	protein_coding
ENSMUSG00000004500	243834	Zfp324	A930002M05, D430030K24Rik, ZF5128	protein_coding	E002		0.701819	E003		0.988631	E006		0.899988	E004		0.881474
ENSMUSG00000004508	14389	Gab2	AI463667, D130058I17Rik, p97	protein_coding	E001	0.164135	0.638246	E010	0.0314841	0.958794	E003	-0.0754437	0.696351	E010	0.0355529	0.698318
ENSMUSG00000004530	23790	Coro1c	AL022675, AW455561, AW548837	protein_coding	E017	0.745647	0.461295	E029	-0.153997	0.930742	E001	0.0452652	0.285128	E006	0.0644924	0.819438
ENSMUSG00000004535	52440	Tax1bp1	1200003J11Rik, 1700069J21Rik, AA930106, D6Ertd404e, D6Ertd772e, T6bp, TXBP151	protein_coding	E023	0.0805241	0.728647	E011	0.0605286	0.894076	E010	-0.161823	0.675179	E023	0.0701001	0.761903
ENSMUSG00000004540	26437	Psg17	Cea-2, Cea2, mmCGM5	protein_coding
ENSMUSG00000004542	26439	Psg19	Cea-4, Cea4, CGM7	protein_coding
ENSMUSG00000004552	13034	Ctse	A430072O03Rik, C920004C08Rik, CatE, CE	protein_coding	E001		0.30295
ENSMUSG00000004558	29811	Ndrg2	AI182517, AU040374, Ndr2, SYLD	protein_coding
ENSMUSG00000004561	52535	Mettl17	2310032K15Rik, D14Ertd209e, Mett11d1	protein_coding	ENSMUSG00000004561+ENSMUSG00000072572:E054	0.317752	6.95344e-05	ENSMUSG00000004561+ENSMUSG00000072572:E011	0.353871	0.417993	ENSMUSG00000004561+ENSMUSG00000072572:E059	-0.79945	0.0535078	ENSMUSG00000004561+ENSMUSG00000072572:E040	-0.379458	0.396193	0.08	0.34	0.02	0.19	-0.04	0.15	0.14	1.04	0.09	1.54			-0.15	0.7
ENSMUSG00000004562	268739	Arhgef40	E130112L23Rik, Gm669, Solo	protein_coding	E025	-0.149691	0.513296	E007	0.339295	0.355573	E019		0.802871	E019	0.157858	0.858132	-0.23	1.31	-0.02	0.11	-0.01	0.04	-0.16	0.69																			-0.04	0.18	-0.1	1.48
ENSMUSG00000004565	50767	Pnpla6	AI661849, MSws, Nte	protein_coding	E018	-0.28709	0.303555	E011	-0.327982	0.257202	E031	-0.123107	0.73695	E011	-0.25057	0.591745
ENSMUSG00000004567	94178	Mcoln1	2210015I05Rik, mucolipidin, TRPML1	protein_coding	E011	-0.114417	0.259403	E018	0.630031	0.313231	E009	-0.100623	0.591648	E025	0.0694097	0.840482
ENSMUSG00000004568	102098	Arhgef18	AI467246, D030053O22Rik	protein_coding	E024	0.201836	0.671044	E018	-0.169911	0.788942	E018		0.68694	E013	-0.205875	0.781125
ENSMUSG00000004591	109333	Pkn2	6030436C20Rik, AI507382, PRK2, Prkcl2, Stk7	protein_coding	E012	-0.34347	0.142498	E012	-0.307145	0.399313	E028		0.65193	E027	0.287261	0.297741	0.03	0.12	-0.01	0.1	0.03	0.14	0.02	0.07									0.15	1.65					0.21	4.71							-0.02	0.1
ENSMUSG00000004609	12489	Cd33	gp67, Siglec-3	protein_coding	E001	-0.0405126	0.100406	E005	-0.017469	0.980339	E006	0.0478446	0.827984	E003	0.0698081	0.841528
ENSMUSG00000004610	110826	Etfb	0610009I16Rik, 2810441H06Rik	protein_coding	E003	0.0221134	0.873876	E006	-0.0311735	0.877446	E005	-0.0874768	0.788792	E008	0.552584	0.459128
ENSMUSG00000004612	72310	Nkg7	2500004F03Rik	protein_coding	E001		0.618154
ENSMUSG00000004613	233187	Lim2	19kDa, 4833403J20, MP19, To3	protein_coding
ENSMUSG00000004626	20911	Stxbp2	C79054, Munc-18-2, Munc-18b, Munc18b, muSec1, Sxtbp2, Sxtp2, Unc18-2, Unc18b	protein_coding	E039	-0.850141	0.0708427	E043	0.117572	0.482147	E013	0.281246	0.879613	E044	0.16338	0.874295	0	0	0.09	0.33	0	0	0	0
ENSMUSG00000004630	18545	Pcp2	L7, Pcp-2	protein_coding													-0.07	1.27	-0.06	0.72			-0.05	1.13	-0.02	0.08			-0.02	0.09	-0.03	0.12
ENSMUSG00000004631	20392	Sgce	e-SG	protein_coding
ENSMUSG00000004633	69993	Chn2	1700026N20Rik, 4930557O16Rik, ARHGAP3, Bch	protein_coding
ENSMUSG00000004637	80707	Wwox	5330426P09Rik, 9030416C10Rik, WOX1	protein_coding	E022	0.227397	0.679519	E003		0.566793	E022		0.69276	E003	-0.213078	0.581413
ENSMUSG00000004642	20492	Slbp		protein_coding	E002	-0.476295	0.218003	E004	0.144396	0.832235	E004		0.641926	E002	-0.364598	0.611246	0	0	0.02	0.05	0.01	0.05	0.04	0.64
ENSMUSG00000004651	22173	Tyr	albino, c, skc35	protein_coding
ENSMUSG00000004654	14602	Ghrhr	Ghrfr, lit, little	protein_coding
ENSMUSG00000004655	11826	Aqp1	CHIP28	protein_coding
ENSMUSG00000004661	56380	Arid3b	Bdp, Dri2	protein_coding	E023		0.618238	E010		0.735857	E028		0.230793	E009		0.811564							-0.06	0.24
ENSMUSG00000004665	12798	Cnn2	AA408047, AI324678, Calpo2	protein_coding	E005	-0.129868	0.62832	E009		0.981585	E005		0.840745	E005		0.371594	-0.01	0.03
ENSMUSG00000004667	66420	Polr2e	2410021N14Rik, 25kDa, AW208866, RPB5, XAP4	protein_coding	E002	0.0883427	0.740178	E002	0.169337	0.124783	E002	0.182024	0.302911	E003	0.11119	0.624649													-0.02	0.09
ENSMUSG00000004668	268379	Abca13	9830132L24, A930002G16Rik, AI956815	protein_coding
ENSMUSG00000004677	17925	Myo9b		protein_coding	E010	0.12808	0.145353	E025	0.121334	0.641483	E010	0.0972482	0.677735	E025	0.134729	0.489746	-0.04	0.43			0.11	2.51	0.04	0.16	0	0	0	0	0	0	0	0
ENSMUSG00000004698	79221	Hdac9	AV022454, D030072B18Rik, HD7B, HD9, Hdac7b, HDRP, Mitr, mKIAA0744	protein_coding	E010		0.0221869	E004		0.77247	E006		0.910533	E001		0.885391																									0.1	0.4	0.04	0.23			0.19	2.99
ENSMUSG00000004707	17085	Ly9	AI893573, CD229, Lgp100, Ly-9, SLAMF3, T100	protein_coding	E009	0.098655	0.452762	E003	-0.0877352	0.620979	E011	0.0764056	0.533622	E008	0.103854	0.799035
ENSMUSG00000004709	18106	Cd244	2B4, C9.1, F730046O15Rik, Ly90, NAIL, NKR2B4, Nmrk, SLAMF4	protein_coding	E001	0.251855	0.807617	E001	0.16707	0.984909	E008		0.83051	E001	0.28481	0.787693
ENSMUSG00000004730	13733	Emr1	DD7A5-7, EGF-TM7, F4/80, Gpf480, Ly71, TM7LN3	protein_coding	E025	-0.181498	0.0701389	E013	0.0715849	0.170207	E023	-0.111134	0.610828	E025	-0.138696	0.637302																																	0
ENSMUSG00000004748	67900	Mtfp1	1700020C11Rik, 2610507A21Rik, AV005788, Mtp18	protein_coding	E006		0.406224	E001		0.972601	E006		0.996509	E002		0.993273
ENSMUSG00000004768	19335	Rab23	AW545388, opb, opb2	protein_coding	E025		0.547554	E024		0.665535	E025		0.86449	E024		0.843103
ENSMUSG00000004771	53869	Rab11a		protein_coding	E001	-0.43379	4.20037e-05	E016	0.0779793	0.875081	E011	-0.0888225	0.684009	E001	-0.2495	0.642904	-0.01	0	0	0	0	0	0.01	0.1									-0.09	3.58
ENSMUSG00000004788	217715	Eif2b2	AA409345, C85417, EIF-2Bbeta, EIF2B	protein_coding	E018	-1.93802	0.145353	E016	0.0954352	0.948285	E009		0.203171	E016	0.209584	0.427431			-0.02	0.08			-0.02	0.09																							-0.01	0.03
ENSMUSG00000004789	78920	Dlst	1600017E01Rik, 4632413C10Rik, 4930529O08Rik, DLTS	protein_coding	E006	0.0858576	0.643094	E006	0.112834	0.550308	E012	-0.083549	0.947464	E006	0.101647	0.781125
ENSMUSG00000004791	18654	Pgf	AI854365, PIGF, Plgf	protein_coding	E003		0.617006	E001		0.893586	E001		0.999975	E001		0.999937
ENSMUSG00000004798	29869	Ulk2	A830085I22Rik, AU015340, mKIAA0623, Unc51.2	protein_coding	E023	-0.320036	0.392686	E011	-0.15455	0.287578	E011	-0.141405	0.563721	E006	-0.134999	0.754933
ENSMUSG00000004814	56221	Ccl24	CKb-6, MPIF-2, Scya24	protein_coding
ENSMUSG00000004815	110524	Dgkq	110kDa, DAGK, Dagk4, DAGK7, Dgkd	protein_coding	E014	0.369015	0.348844	E015	0.618954	0.788942	E035		0.832673	E019	-0.206545	0.858862									-0.05	0.28															0	0.03	0.06	0.22	0	0	0	0.07	0.01
ENSMUSG00000004821	67366	Tmed11	1810008K16Rik	protein_coding
ENSMUSG00000004837	71520	Grap	8430435N19Rik, BB233594	protein_coding	E007		0.69436
ENSMUSG00000004842	18736	Pou1f1	dw, dwarf, GHF-1, Hmp1, Pit-1, Pit1, Pit1-rs1	protein_coding
ENSMUSG00000004843	68942	Chmp2b	1190006E07Rik	protein_coding	E001	-0.138897	0.0300307	E004	0.0161884	0.999699	E004		0.973563	E001	-0.0830445	0.836444
ENSMUSG00000004846	26433	Plod3	AI414586, LH3	protein_coding	ENSMUSG00000004846+ENSMUSG00000076240:E013	-0.42673	0.350075	ENSMUSG00000004846+ENSMUSG00000076240:E019	0.0650332	0.77257	ENSMUSG00000004846+ENSMUSG00000076240:E019	0.0717513	0.917734	ENSMUSG00000004846+ENSMUSG00000076240:E019	0.0670148	0.50782																									0	0	0	0	0	0	0	0	0
ENSMUSG00000004849	11769	Ap1s1	AP19	protein_coding	E003	-0.448436	0.682341	E003	0.370373	0.844077	E001	0.0544288	0.868504	E008	0.0446774	0.999937
ENSMUSG00000004864	26415	Mapk13	SAPK4, Serk4	protein_coding	E013		1
ENSMUSG00000004865	20815	Srpk1	AU017960	protein_coding	E020	0.162598	0.374335	E022	0.249869	0.415025	E002	-0.111658	0.711561	E002	-0.169398	0.605752
ENSMUSG00000004872	18505	Pax3	Pax-3, Sp, splotch	protein_coding
ENSMUSG00000004880	98386	Lbr	AI505894, ic	protein_coding	E013	-0.289766	0.310037	E005		0.683653	E006		0.985453	E004		0.819376
ENSMUSG00000004885	12904	Crabp2	AI893628, Crabp-2, CrabpII	protein_coding
ENSMUSG00000004891	18008	Nes	AA166324, C78523, ESTM46	protein_coding
ENSMUSG00000004892	12032	Bcan	Cspg7	protein_coding
ENSMUSG00000004894	73940	Hapln2	4930401E20Rik, Bral1	protein_coding
ENSMUSG00000004895	94315	Prcc		protein_coding	E005	-0.0388528	0.769513	E005	-0.0663471	0.801405	E005		0.761023	E003	0.110862	0.884998
ENSMUSG00000004896	229503	Rrnad1		protein_coding	E033	-1.4549	0.483742	E012	0.272252	0.641483	E016		0.398463	E014	0.361146	0.750055	-0.08	0.33											0.13	0.68	-0.19	0.83																	-0.05
ENSMUSG00000004897	15191	Hdgf	AI118077, D3Ertd299e	protein_coding	E001	0.083442	0.770327	E012	-0.063525	0.947535	E001	0.142465	0.57035	E013	0.0342002	0.981833							-0.02	0.24
ENSMUSG00000004902	71803	Slc25a18	1500015I14Rik, AW125787	protein_coding	E007		0.55311	E010		0.966481
ENSMUSG00000004929	50492	Thop1	AI131655, AI327041, EP24.15	protein_coding	E003	0.342502	0.495533	E018		0.833443	E003		0.630459	E007	-0.195655	0.775909
ENSMUSG00000004931	57267	Apba3	AW208791, lin-10, Mint-3, mint3, X11gamma	protein_coding	ENSMUSG00000092781+ENSMUSG00000004931:E011	-0.211775	0.329826	ENSMUSG00000092781+ENSMUSG00000004931:E011	-0.19415	0.709199	ENSMUSG00000092781+ENSMUSG00000004931:E011		0.568233	ENSMUSG00000092781+ENSMUSG00000004931:E005	0.248636	0.476872
ENSMUSG00000004933	17179	Matk	CHK, HYL, Ntk	protein_coding	E028		0.153806
ENSMUSG00000004934	59004	Pias4	Pias-gamma, Piasg, PIASY	protein_coding	E006	0.186234	0.362245	E002	0.245789	0.427311	E002		0.739413	E009	-0.17465	0.89349
ENSMUSG00000004936	26395	Map2k1	MAPKK1, Mek1, MEKK1, Prkmk1	protein_coding	E002	-0.0593672	0.571299	E016	0.0394992	0.947535	E002	-0.0562896	0.848494	E002	-0.0678694	0.658799
ENSMUSG00000004937	52551	Sgta	5330427H01Rik, AI194281, D10Ertd190e, Sgt, Stg	protein_coding	E006	-0.0690408	0.767101	E006	-0.0673404	0.95495	E001	0.0543838	0.685154	E001	0.0358349	0.938335
ENSMUSG00000004939	69564	Nmrk2	2310015C21Rik, Itgb1bp3, Mibp	protein_coding
ENSMUSG00000004945	70544	Tmem242	1110008A10Rik, 2310046K16Rik, 5730437N04Rik	protein_coding	E003	0.0865243	0.780235	E004		0.998489	E004		0.984076	E004	-0.047662	0.999937
ENSMUSG00000004947	74198	Dtx2	2610524D08Rik, AA408415, AU022494, Deltex2	protein_coding	E006	0.353257	0.401731	E018		0.431325	E024		0.526452	E024		0.692892	0.06	0.26	0.08	0.23					-0.46	42.06			-0.4	1260.83	-0.28	13.53
ENSMUSG00000004948	22788	Zp3	Zp-3	protein_coding
ENSMUSG00000004951	15507	Hspb1	27kDa, Hsp25	protein_coding
ENSMUSG00000004952	54153	Rasa4	AA793972, AW112107, BB079060, CAPRI, GAPL	protein_coding	E029	-0.470157	0.093876	E029	-0.302832	0.738755	E029		0.498102	E004	0.320993	0.880281	-0.06	0.48	0	0.04	0	0.05	-0.05	0.21	0.18	5.89
ENSMUSG00000004961	53420	Syt5	SytV	protein_coding
ENSMUSG00000004980	53379; 100045191	Hnrnpa2b1	9130414A06Rik, hnrnp-A, Hnrpa2, Hnrpa2b1	protein_coding	E004	-0.475622	1.90032e-06	E009	-0.164488	0.881973	E006	-0.0497814	0.687082	E013	0.029194	0.633741	0.08	0.44			0.04	0.17
ENSMUSG00000004988	108017	Fxyd4	0610008I02Rik, AI267073, Chif	protein_coding
ENSMUSG00000004994	67736	Ccdc130	4930527D15Rik, C77430	protein_coding	E010	0.211313	0.745245	E015		0.669335	E007		0.852961	E010	0.194763	0.922583							0.08	0.37																			0.04	0.87			0.31	1.23
ENSMUSG00000004996	67873	Mri1	2410018C20Rik	protein_coding	E009	-0.440369	0.347673	E014	-0.29776	0.901163	E010		0.953304	E014	-0.478335	0.592538	-0.01	0	-0.02	0.08	-0.01	0	-0.01	0																	0.02	0.1	0.03	0.16	-0.01	0.03	-0.01	0.03
ENSMUSG00000005034	18749	Prkacb	Pkacb	protein_coding	E001	-0.598585	0.328055	E016	1.00619	0.00954774	E016		0.0510342	E016	0.857893	0.233034
ENSMUSG00000005043	27029	Sgsh	4632406A19Rik	protein_coding	E013		0.465765	E003		0.999699	E003		0.999975	E003		0.999937
ENSMUSG00000005045	269610	Chd5	4930532L22Rik, AW060752, B230399N07Rik	protein_coding	E034	0.292457	0.376846	E024	-0.191451	0.772168	E025	-0.251243	0.471321	E042	0.173204	0.849298																																	0.03
ENSMUSG00000005054	13014	Cstb	AA960480, Stfb	protein_coding	E001	-0.00304733	0.986845	E002	-0.00198105	0.999699	E001	0.0453137	0.814105	E001	-0.00281056	0.999937
ENSMUSG00000005057	23921	Sh2b2	Aps	protein_coding	E006	-0.137815	0.61175	E004	-0.115402	0.922497	E007		0.355353	E007	-0.115521	0.958234
ENSMUSG00000005069	19305	Pex5	AW212715, ESTM1, PTS1R, Pxr1, X83306	protein_coding	E015	-0.429289	0.358754	E016	1.13732	0.0412406	E020		0.751038	E006	0.153721	0.692892			0.1	0.43																					-0.05	0.2	-0.04	0.25	-0.06	0.2	-0.06	0.2	0.07
ENSMUSG00000005078	104771	Jkamp	1200003C05Rik, 2310047L11Rik, Jamp	protein_coding	E006	-0.124964	0.80691	E003	-0.253974	0.464368	E015		0.860781	E006	0.122984	0.932591
ENSMUSG00000005087	12505	Cd44	AU023126, AW121933, AW146109, HERMES, Ly-24, Pgp-1	protein_coding	E007	0.0585912	6.67845e-08	E008	0.0501992	0.591575	E011	-0.274924	0.766919	E007	0.0347607	0.0734823	-0.04	0.14	-0.01	0	-0.02	0.14	-0.05	0.18
ENSMUSG00000005089	20511	Slc1a2	1700091C19Rik, 2900019G14Rik, AI159670, Eaat2, GLT-1, GLT1, MGLT1	protein_coding	E029		0.630383
ENSMUSG00000005102	27103	Eif2ak4	2610011M03, GCN2, MGCN2	protein_coding	E031	-0.2517	0.307588	E031	-0.372421	0.234822	E013	0.163915	0.486336	E048	-0.233609	0.728272	0.01	0.09			0.05	0.41	0.07	0.34
ENSMUSG00000005103	22388	Wdr1	Aip1, D5Wsu185e, rede	protein_coding	E008	0.0256761	0.602395	E007	0.0360225	0.733959	E001	0.0333588	0.969688	E008	0.0187943	0.854455																																	-0.01
ENSMUSG00000005107	117591	Slc2a9	Glut9, SLC2a9A, SLC2A9B	protein_coding	E016	0.906135	0.0120943	E005		0.818837	E004		0.238136	E010		0.629768					-0.02	0.1	0.35	3.63																							-0.42	3.55
ENSMUSG00000005124	22402	Wisp1	AW146261, CCN4, Elm1	protein_coding
ENSMUSG00000005125	17988	Ndrg1	CAP43, CMT4D, DRG1, HMSNL, Ndr1, Ndrl, NMSL, PROXY1, RTP, TDD5	protein_coding	E001		0.579661	E001		0.999699	E001		0.833624	E001		0.724916
ENSMUSG00000005131	75311	4930550C14Rik	AU017961	protein_coding
ENSMUSG00000005142	17159	Man2b1	AW107687, LAMAN	protein_coding	E001	0.0581883	0.365058	E005	-0.0240558	0.748624	E005	-0.039881	0.517105	E003	0.0267727	0.825099
ENSMUSG00000005148	12224	Klf5	4930520J07Rik, Bteb2, CKLF, IKLF	protein_coding	E002		0.957385
ENSMUSG00000005150	67836	Wdr83	1500041N16Rik, Morg1	protein_coding	E006	-0.693633	0.263793	E019		0.947338	E015		0.854213	E028	-0.420909	0.690423	-0.1	0.39	-0.04	0.25			-0.08	0.28					0.13	0.5	0.17	0.79					0.22	3.56
ENSMUSG00000005161	21672	Prdx2	AL022839, Band-8, NkefB, PRP, PrxII, Tdpx1, TDX1, Torin, TPx, TPx-B, TR, TSA	protein_coding	E008	0.462852	0.0417232	E008	0.173032	0.96754	E014	-0.0617869	0.868504	E014	-0.0313289	0.965229																																	-0.09
ENSMUSG00000005198	20020	Polr2a	220kDa, Rpb1, Rpo2-1	protein_coding	E032	0.0843612	0.174019	E020	0.115622	0.258193	E020	0.0976358	0.643198	E020	0.129512	0.357671	0	0	0	0	0	0	0	0
ENSMUSG00000005202	20415	Shbg	ABP	protein_coding
ENSMUSG00000005204	80886	Senp3	AA408656, Smt3ip, Smt3ip1	protein_coding	E025	-0.76927	0.0511109	E023	0.204262	0.113294	E015	-0.123597	0.547033	E023	0.201042	0.220365
ENSMUSG00000005220	53419	Corin	AV273130, Lrp4	protein_coding
ENSMUSG00000005225	231999	Plekha8	6330400G01, AA517676, BC052360, Fapp-2, Fapp2	protein_coding	E013		0.19006	E012		0.52108	E008		0.898448	E016		0.144736
ENSMUSG00000005232	14378	G6pc2	G6pc-rs, IGRP	protein_coding
ENSMUSG00000005233	66442	Spc25	2600017H08Rik, 2610205L13Rik, Spbc25	protein_coding	E010	-0.270577	0.522423	E019		0.833463	E002		0.868504	E013		0.93724	0	0.03	-0.15	0.51	-0.23	2.25	-0.17	1.94																					-0.09	0.36
ENSMUSG00000005237	327954	Dnahc2	2900022L05Rik, 4930564A01, D130094J20, D330014H01Rik, Dnahc2, Dnhd3	protein_coding	E061		0.110631
ENSMUSG00000005251	72388	Ripk4	2310069J12Rik, AI552420, ANKK2, Ankrd3, DIk, PKK, RIP4	protein_coding
ENSMUSG00000005262	22230	Ufd1l	Ufd1	protein_coding	E011	0.0777516	0.832915	E033	0.0953361	0.837912	E032	-0.332591	0.294278	E032	-0.205719	0.760459	0.01	0.07	0	0.03	0	0.08	0	0.05																	0.07	0.33			0.13	2.31
ENSMUSG00000005267	170740	Zfp287	B230333C16Rik, mszf16, mszf74, SKAT-2, Skat2, Znf287	protein_coding	E004		0.0607032	E006		0.839768	E003		0.657894	E013		0.670611	-0.02	0.05					-0.02	0.05
ENSMUSG00000005268	19116	Prlr	AI987712, Pr-1, Pr-3, Prlr-rs1	protein_coding
ENSMUSG00000005299	56384	Letm1		protein_coding	E004	-0.142971	0.23254	E004	-0.138003	0.344025	E014	0.102122	0.901119	E004	-0.101918	0.802187															0.03	0.15
ENSMUSG00000005312	56085	Ubqln1	1110046H03Rik, 1810030E05Rik, AU019746, C77538, D13Ertd372e, Da41, Dsk2, Plic-1, Plic1, Xdrp1	protein_coding	E001	-0.101257	0.0857174	E011	0.178141	0.47322	E011	0.198381	0.212341	E011	0.136166	0.509343																																	0
ENSMUSG00000005320	14186	Fgfr4	Fgfr-4	protein_coding
ENSMUSG00000005338	94332	Cadm3	BIgR, Igsf4b, Necl-1, Necl1, SynCAM3, Tsll1	protein_coding
ENSMUSG00000005339	14125	Fcer1a	Fce1a, fcepsilonri, FcERI, Fcr-5	protein_coding
ENSMUSG00000005354	56551	Txn2	2510006J11Rik, AI788873, Trx2	protein_coding	E007	0.0762311	0.443875	E010	0.391659	0.779922	E005	0.0885138	0.493103	E010	0.381411	0.664585
ENSMUSG00000005355	12365	Casp14	MICE, mini-ICE	protein_coding
ENSMUSG00000005357	20513	Slc1a6	EAAT4	protein_coding
ENSMUSG00000005360	20512	Slc1a3	AI504299, B430115D02Rik, Eaat1, GLAST, GLAST-1, GLU-T, GluT-1, Gmt1, MGluT1	protein_coding	E002		0.350294	E002		0.962362	E002		0.999611	E001		0.999937
ENSMUSG00000005362	58799	Crbn	2610203G15Rik, 2900045O07Rik, AF229032, AW108261, piL	protein_coding	E005	0.581548	0.292006	E005	0.51583	0.799324	E013		0.896549	E013	0.0701878	0.955533
ENSMUSG00000005364	16192	Il5ra	CD125, CDw125, Il5r	protein_coding
ENSMUSG00000005370	17688	Msh6	AU044881, AW550279, GTBP, Gtmbp	protein_coding	E009	-0.226925	0.316212	E001		0.891383	E010		0.91535	E006	-0.172477	0.966364
ENSMUSG00000005371	225055	Fbxo11	C80048, Jf	protein_coding	E001	-0.308675	0.0276568	E024	0.225091	0.56084	E001	-0.160363	0.947632	E013	-0.223879	0.327116	0.01	0.04	0	0	0	0	0.01	0.06
ENSMUSG00000005373	58805	Mlxipl	bHLHd14, ChREBP, Wbscr14, WS-bHLH	protein_coding
ENSMUSG00000005374	27368	Tbl2	C76179, WS-bTRP	protein_coding	E013	-0.0642247	0.620457	E011		0.516698	E012		0.968779	E013		0.991369					-0.07	0.24
ENSMUSG00000005378	66138	Wbscr22	1110003N24Rik	protein_coding	E014	-1.16616	0.187035	E039	-0.381786	0.915393	E029	-0.151297	0.895558	E029	-0.21446	0.803882	0.04	0.18	0	0.03			0	0																							0	0.04
ENSMUSG00000005397	18073	Nid1	A630025O17, entactin, entactin-1, Nid, nidogen-1	protein_coding
ENSMUSG00000005410	17218	Mcm5	AA617332, AI324988, AL033333, Cdc46, mCD46, mCDC46, Mcmd5, P1-CDC46	protein_coding	E010	0.11181	0.676678	E010	0.201942	0.827244	E016		0.921836	E013	0.138621	0.851062
ENSMUSG00000005413	15368	Hmox1	D8Wsu38e, Hemox, Hmox, HO-1, HO1, Hsp32	protein_coding	E005	-0.450813	0.0548073	E001	-0.121489	0.346022	E004	-0.0152512	0.916277	E008	0.0210915	0.949039
ENSMUSG00000005417	26936	Mprip	9530046C02, AA536749, AI647711, C76423, mKIAA0864, p116Rip, Rhoip3, RIP3	protein_coding	E034	0.599118	0.516736	E013	-0.283957	0.397506	E014	0.243342	0.345289	E027	-0.0987146	0.923933	-0.19	33.86	0.02	0.08																									-0.17	64.95
ENSMUSG00000005442	71722	Cic	1200010B10Rik, mKIAA0306	protein_coding	E021	0.138908	0.0432289	E021	0.170741	0.0872606	E043	0.10045	0.850414	E021	0.11896	0.172779									0	0	0	0	0	0	0	0
ENSMUSG00000005447	18476	Pafah1b3	mus[g], Pafahg	protein_coding	E016	-0.382889	0.599214	E016		0.779762	E005		0.979758	E015		0.274915
ENSMUSG00000005465	50931	Il27ra	CRL1, IL-27R, Tccr, WSX-1, Wsx1, zcytor1	protein_coding	E003		0.532297	E014		0.624401	E002		0.886598	E010		0.76295
ENSMUSG00000005469	18747	Prkaca	Pkaca, PKCD	protein_coding	E009	-0.173579	0.465833	E004	0.118197	0.571991	E009	-0.125349	0.853381	E007	0.0923603	0.739398
ENSMUSG00000005470	66929	Asf1b	1700003K02Rik, AA409591	protein_coding	E006	-0.09321	0.816664	E002		0.999699	E006		0.997215	E002	-0.040858	0.999937
ENSMUSG00000005474	59310	Myl10	1700027I08Rik, Mylc2pl, PLRLC, PLRLC-A, PLRLC-B, PLRLC-C	protein_coding
ENSMUSG00000005481	68278	Ddx39	2610307C23Rik, BAT1, Ddx39a, DDXL, URH49	protein_coding	E019	0.799252	0.0344605	E019	0.594702	0.597896	E003		0.852064	E001	0.271374	0.93724									0.13	526.2
ENSMUSG00000005483	81489	Dnajb1	0610007I11Rik, Hsp40, HSPF1	protein_coding	E001	-0.0348008	0.96798	E002	0.015328	0.999699	E003		0.999975	E003	0.00924178	0.999937
ENSMUSG00000005493	55993	Msh4	4930485C04Rik, AV144863, mMsh4	protein_coding
ENSMUSG00000005501	227334	Usp40	B230215L03Rik, C730029K03	protein_coding	E019	-0.64698	0.0639975	E026		0.548524	E012		0.700208	E012	0.519483	0.867213	-0.1	0.43
ENSMUSG00000005503	14028	Evx1	Evx-1	protein_coding
ENSMUSG00000005505	67136	Kbtbd4	2510026C23Rik	protein_coding	E010	0.202813	0.502994	E009		0.638344	E012		0.860419	E009		0.958522
ENSMUSG00000005506	13046	Celf1	1600010O03Rik, AA407467, Brunol2, CUG-BP, CUG-BP1, CUGBP, Cugbp1, D2Wsu101e, HNAB50, NAB50	protein_coding	E015	0.295351	0.0741639	E019	-0.129981	0.640983	E010	-0.670892	0.155037	E010	-0.565609	0.269307	0.23	49.38	0.24	3.34	0.31	7102.68	0.32	2.03298e+10	-0.01	0	-0.01	0	-0.01	0	-0.01	0					0.19	2.96	0.22	11.73									0.13
ENSMUSG00000005510	68349	Ndufs3	0610010M09Rik, CI-30kD	protein_coding	E014	-0.477594	0.210625	E015	-0.0801284	0.961573	E014		0.929207	E012	-0.255416	0.876914					0.04	0.15	0	0.06
ENSMUSG00000005514	18984	Por	4933424M13Rik, CPR, CYPOR	protein_coding	E019	-0.873031	0.0705254	E022	0.284648	0.889583	E031	0.084848	0.313218	E008	0.0951262	0.836966									0.02	0.1					0.04	0.22
ENSMUSG00000005533	16001	Igf1r	A330103N21Rik, CD221, D930020L01, hyft, IGF-1R	protein_coding	E002		0.193626	E021		0.999699
ENSMUSG00000005534	16337	Insr	4932439J01Rik, CD220, D630014A15Rik, IR, IR-A, IR-B	protein_coding	E012	0.195045	0.293401	E012	0.134428	0.769306	E009	-0.0784045	0.981233	E016	-0.166351	0.541222	-0.16	6.9
ENSMUSG00000005540	14128	Fcer2a	CD23, Fce2, Fcer2, Ly-42	protein_coding
ENSMUSG00000005547	13087	Cyp2a5	Coh, Cyp15a2, CYPIIA5	protein_coding
ENSMUSG00000005553	11944	Atp4a		protein_coding
ENSMUSG00000005566	21849	Trim28	AA408787, KAP-1, KRIP-1, Tif1b, Tif1beta	protein_coding	E012	0.144012	0.289647	E012	0.221734	0.0881368	E025	0.139815	0.787711	E001	-0.128634	0.913332															0.02	0.08
ENSMUSG00000005575	22192	Ube2m	2510040H03Rik, Ubc-rs2, UBC12	protein_coding	E008	-0.722106	0.0226012	E008	-0.228726	0.943127	E022	-0.262396	0.762711	E008	-0.437494	0.619177													0	0.03	0.04	0.13
ENSMUSG00000005580	11515	Adcy9	ACtp10, AW125421, D16Wsu65e, mKIAA0520	protein_coding	E013		0.321564	E002		0.962362	E002		0.999975	E002		0.683052
ENSMUSG00000005583	17260	Mef2c	5430401D19Rik, 9930028G15Rik, AV011172, Mef2	protein_coding	E008		0.348962	E013		0.929189	E013		0.999975	E013		0.999937
ENSMUSG00000005609	22083	Ctr9	AA409336, mKIAA0155, Sh2bp1, Tsbp, Tsp	protein_coding	E023	-0.205981	0.295793	E017	-0.356339	0.0872606	E022	-0.324028	0.320931	E023	-0.193751	0.487928
ENSMUSG00000005610	13690	Eif4g2	AA589388, DAP-5, E130105L11Rik, Nat1, Natm1, p97	protein_coding	ENSMUSG00000005610+ENSMUSG00000088948:E004	-0.312258	0.0191056	ENSMUSG00000005610+ENSMUSG00000088948:E001	0.511959	0.452176	ENSMUSG00000005610+ENSMUSG00000088948:E017	0.0748882	0.079979	ENSMUSG00000005610+ENSMUSG00000088948:E042	0.0332214	0.670317	-0.02	0.5	0.04	1.92	0.04	3.98	0.02	0.35																									0
ENSMUSG00000005611	17540	Mrvi1	BB115629, Irag, Ris1	protein_coding	E003		0.579019
ENSMUSG00000005615	13026	Pcyt1a	Cctalpha, CTalpha, Ctpct, Cttalpha	protein_coding	E013	0.104262	0.566638	E004	-0.202111	0.818016	E009	0.115175	0.931732	E013	0.136397	0.422217
ENSMUSG00000005621	233410	Zfp592	8430405N24, A730014M16Rik, mKIAA0211, Znf592	protein_coding	E007	0.10647	0.195758	E007	0.103747	0.84564	E007	0.0932648	0.586935	E007	0.0768636	0.830905
ENSMUSG00000005625	19185	Psmd4	Af1, angiocidin, Mcb1	protein_coding	E014	0.110445	0.0303816	E015	0.0545608	0.771195	E010	0.0848048	0.738164	E025	-0.110576	0.851167	0	0	0	0	0	0	0	0																	-0.02	0.15			0.05	0.19	-0.01	0.05
ENSMUSG00000005628	50874	Tmod4	MTMOD, Sk-Tmod	protein_coding	E009		0.994208
ENSMUSG00000005640	23920	Insrr	Irr	protein_coding
ENSMUSG00000005649	29865	Cabp5		protein_coding
ENSMUSG00000005656	72183	Snx6	2010006G21Rik, 2610032J07Rik, 2810425K19Rik, AU018928, C85963	protein_coding	E006	0.119686	0.500933	E005	0.103522	0.915457	E011	-0.132607	0.848648	E005	0.0928751	0.93724	0	0	0.01	0.03	-0.01	0	-0.01	0
ENSMUSG00000005667	17768	Mthfd2	AW558851, NMDMC	protein_coding	E001	-0.146565	0.543005	E001		0.893677	E012		0.622878	E012	0.147748	0.919758
ENSMUSG00000005672	16590	Kit	Bs, c-KIT, CD117, Fdc, Gsfsco1, Gsfsco5, Gsfsow3, SCO1, SCO5, SOW3, Ssm, Tr-kit, W	protein_coding	E030		0.732934
ENSMUSG00000005674	641376	Tomm40l		protein_coding	E010		0.646268	E009		0.871081	E009		0.293213	E009		0.812527	-0.02	0.05	-0.01	0.06	-0.01	0.09																											-0.03
ENSMUSG00000005677	12355	Nr1i3	AA209988, AI551208, CAR, CAR-beta, Care2, ESTM32, MB67	protein_coding																	-0.01	0.41	0.06	0.46
ENSMUSG00000005681	11807	Apoa2	Alp-2, Apoa-2, ApoA-II, ApoAII, Hdl-1	protein_coding	E010		0.908383
ENSMUSG00000005682	103135	Pan2	1200014O24Rik, AI047843, AW742773, mKIAA0710, Usp52	protein_coding	E005	0.221116	0.755836	E015	-0.418059	0.435688	E001		0.782973	E005	0.4404	0.277074
ENSMUSG00000005683	12974	Cs	2610511A05Rik, 9030605P22Rik, ahl4, BB234005, Cis	protein_coding	E011	-0.0290124	0.512228	E001	-0.0801442	0.659348	E007	-0.0599513	0.810169	E011	-0.0302735	0.86826
ENSMUSG00000005686	11717	Ampd3		protein_coding	E008	0.131997	0.398194	E025	0.106677	0.80035	E019	-0.111868	0.898396	E008	0.0949241	0.885966	0	0	0	0	0	0	0	0
ENSMUSG00000005687	68183	Bcas2	6430539P16Rik, AI132645, C76366, C80030	protein_coding	E017	-0.107415	0.564388	E015	0.146767	0.87893	E004		0.935136	E015	0.144182	0.836444
ENSMUSG00000005696	20400	Sh2d1a	Gm686, SAP	protein_coding
ENSMUSG00000005698	13018	Ctcf	AW108038	protein_coding	E022	-0.0763629	0.345349	E004	0.376782	0.853859	E011	-0.262548	0.188582	E016	0.211202	0.249837
ENSMUSG00000005699	56513	Pard6a	0710008C04Rik, 2610010A15Rik, Par-6, Par6, PAR6alpha, Par6c, TAX40, Tip-40	protein_coding	E004		0.0418301	E004		0.667007	E004		0.703771	E004		0.968432
ENSMUSG00000005705	11604	Agrp	Agrt, Art	protein_coding
ENSMUSG00000005716	19293	Pvalb	Parv, PV, Pva	protein_coding
ENSMUSG00000005718	83383	Tfap4	AI642933, AP-4, bHLHc41, D930048N17Rik, Tcfap4	protein_coding	E001		0.0542334	E001		0.62991	E005		0.846881	E003		0.762269
ENSMUSG00000005732	19385	Ranbp1	Htf9a	protein_coding	E001	-1.21094	0.232032	E006	-0.0671601	0.954158	E006	-0.0834383	0.873469	E003	0.0918993	0.940322
ENSMUSG00000005763	12503	Cd247	4930549J05Rik, A430104F18Rik, AW552088, Cd3, Cd3-eta, Cd3-zeta, Cd3h, Cd3z, Cd3zeta, T3z, Tcrk, Tcrz	protein_coding	ENSMUSG00000089829+ENSMUSG00000005763:E001		2.86283e-07																-0.09	0.53																			-0.11	0.36	-0.07	0.35	-0.1	0.31
ENSMUSG00000005774	53970	Rfx5		protein_coding	E023	0.276071	0.604349	E038		0.829669	E035		0.323442	E023	0.467614	0.221519											-0.22	1.91			0.07	0.3											0.32	2.75			-0.19	0.98
ENSMUSG00000005779	19172	Psmb4	Pros-27	protein_coding	E002	0.0662071	0.697495	E008	-0.042819	0.778643	E008	-0.0384054	0.752471	E008	-0.032388	0.877457
ENSMUSG00000005800	17394	Mmp8	BB138268	protein_coding	E002	0.169169	0.480189	E008	0.100487	0.880015	E003		0.98785	E008	0.0826256	0.949614
ENSMUSG00000005802	22785	Slc30a4	lm, Znt4	protein_coding	E007		0.0315304	E002		0.942134	E001		0.93747	E002		0.985283	-0.05	0.2	-0.04	0.26			0.02	0.4
ENSMUSG00000005803	59010	Sqrdl	0610039J17Rik, 4930557M22Rik	protein_coding	E012	0.180915	0.285683	E014	-0.123599	0.311234	E014	-0.0572039	0.93234	E012	0.210143	0.386482	0	0	-0.01	0	0	0	0	0
ENSMUSG00000005804	18457	Bloc1s6	BLOC-1, pa, Pldn, Stx13bp1	protein_coding	E016	-0.126448	0.169136	E005	0.429125	0.685432	E005		0.568233	E016	-0.140332	0.389523
ENSMUSG00000005813	75624	Metap1	1700029C17Rik, AW047992, mKIAA0094	protein_coding	E007	0.21161	0.362829	E005	0.203311	0.56618	E007		0.888571	E005	0.114848	0.939363
ENSMUSG00000005823	78308	Gpr108	1810015L19Rik, AA589464, C79132	protein_coding	E016	0.111715	0.556914	E016	0.167282	0.380772	E001	0.0863452	0.488228	E016	0.156639	0.546937
ENSMUSG00000005824	50930	Tnfsf14	HVEM-L, HVEML, LIGHT, LTg, Ly113	protein_coding	E004		0.963944	E001		0.999699	E001		0.999975	E001		0.999937
ENSMUSG00000005836	14465	Gata6	AA410133, GATA-6	protein_coding
ENSMUSG00000005846	66409	Rsl1d1	2410005K20Rik, C76439, pBK1	protein_coding	E005	-0.154871	0.707109	E010	-0.073553	0.980109	E012		0.499143	E009	-0.175832	0.381417
ENSMUSG00000005864	12789	Cnga2	Cnca, Cncg4, OCNC1	protein_coding
ENSMUSG00000005871	11789	Apc	AI047805, AU020952, AW124434, CC1, mAPC, Min	protein_coding	E010	-0.507141	0.291272	E010	-0.28556	0.768511	E003		0.790802	E032	-0.240701	0.685198	-0.29	1.05	0	0.08	0	0.09	0	0.09									-0.01	0.09	0.02	0.11	0.01	0.1
ENSMUSG00000005873	13476	Reep5	AI324241, AU022809, AW495741, Dp1, DP1/TB2, R74856, TB2/DP1	protein_coding	E001	-0.0738551	0.101242	E002	0.0128545	0.997914	E004	-0.0294967	0.888528	E002	0.0204377	0.993276
ENSMUSG00000005881	66366	Ergic3	2310015B14Rik, AV318804, CGI-54, D2Ucla1, NY-BR-84, Sdbcag84	protein_coding	E014	-1.61516	0.103738	E030	-0.0988065	0.336169	E030	-0.0905428	0.527739	E023	0.0669794	0.904853	-0.14	1.09	0.05	0.75	0.1	0.63					0.04	0.35
ENSMUSG00000005882	56046	Uqcc	2310079L17Rik, 2410003P15Rik, 3110038N19Rik, Bfzb, Bfzp	protein_coding	E005	0.321226	0.381252	E014	-0.210315	0.654865	E018		0.48667	E015	-0.384212	0.170172	0	0.04	0.48	2.42	0.01	0.13	0.03	0.11	0.07	0.26	-0.11	0.55															0.54	9.04					0.04
ENSMUSG00000005883	26972	Spo11	AI449549	protein_coding
ENSMUSG00000005886	17978	Ncoa2	9530095N19, bHLHe75, D1Ertd433e, GRIP-1, Grip1, KAT13C, SRC-2, TIF-2, TIF2	protein_coding	E002	-0.12948	0.00255049	E018	-0.169673	0.82389	E018	-0.161693	0.705924	E018	-0.179511	0.606976	0.24	27837.4	0.14	10.56	0.2	82.92
ENSMUSG00000005891	19110	Prl4a1	AA409771, PLP-A, Prlpa	protein_coding
ENSMUSG00000005892	22044	Trh	Pro-TRH, Trf	protein_coding
ENSMUSG00000005893	22026	Nr2c2	mKIAA4145, TAK1, Tr4	protein_coding	E025	0.154522	0.415098	E018	-0.236304	0.430886	E008		0.717085	E025	0.202649	0.411318																													-0.03	0.12
ENSMUSG00000005897	22025	Nr2c1	4831444H07Rik, 80.3, Eenr, TR2, Tr2-11	protein_coding	E019	-0.491587	0.000572805	E019		0.831332	E008		0.633044	E019	-0.163467	0.913489
ENSMUSG00000005899	77626	Smpd4	4122402O22Rik, mKIAA1418	protein_coding	E041	0.326127	0.423314	E049	-0.314653	0.366216	E028		0.280286	E038	0.322807	0.516138	0	0.07	0	0.05	0.04	0.12	0	0.15																					-0.09	0.31
ENSMUSG00000005907	71382	Pex1	5430414H02Rik, E330005K07Rik, ZWS1	protein_coding	E037	-0.537041	0.417193	E022		0.705059	E029		0.3266	E029	-0.244088	0.813145			0.13	0.41																					-0.06	0.28					-0.02	0.22
ENSMUSG00000005917	18423	Otx1	A730044F23Rik, jv	protein_coding
ENSMUSG00000005936	66989	Kctd20	2410004N11Rik, AI451943, AW541186, D17Ertd562e	protein_coding	E009	0.1181	0.28299	E020	0.0597587	0.577962	E014	-0.0901996	0.845625	E008	-0.162623	0.836444
ENSMUSG00000005947	16407	Itgae	A530055J10, alpha-E1, alpha-M290, aM290, CD103	protein_coding	E010		0.40047
ENSMUSG00000005949	83429	Ctns	AI195360, AW049661	protein_coding	E016	0.853775	0.409549	E007	0.0921358	0.874014	E007	0.151574	0.64507	E015	-0.116434	0.736635	-0.14	0.84					-0.07	0.31
ENSMUSG00000005950	94045	P2rx5	P2X5	protein_coding	E004	0.4572	0.137424	E004		0.848124	E004		0.538098	E002	0.216984	0.955354	0.01	0.09	-0.02	0.06	-0.04	0.22	-0.01	0.06
ENSMUSG00000005951	74637	Shpk	4930431K22Rik, AI194947, AW260459, Carkl	protein_coding	E001		0.862511	E007		0.892599	E002		0.933352	E002		0.908313
ENSMUSG00000005952	193034	Trpv1	OTRPC1, TRPV1alpha, TRPV1beta, VR-1, Vr1	protein_coding
ENSMUSG00000005958	13845	Ephb3	AW456895, Cek10, Etk2, HEK2, MDK5, Sek4, Tyro6	protein_coding
ENSMUSG00000005968	22156	Tuft1		protein_coding	E015		0.627382
ENSMUSG00000005973	19672	Rcn1	Rcn	protein_coding	E006		0.499178
ENSMUSG00000005980	13419	Dnase1	AI788650, DNaseI, Dnl1	protein_coding	E025		0.681191
ENSMUSG00000005981	68015	Trap1	2410002K23Rik, HSP75	protein_coding	E015	-0.154327	0.409047	E010	0.0965683	0.897767	E005	0.100218	0.691787	E010	0.147902	0.39949
ENSMUSG00000005982	74763	Nat15	1200013P24Rik, AI315146, Nat15	protein_coding	ENSMUSG00000014232+ENSMUSG00000005982+ENSMUSG00000093575:E048	-0.442488	0.498389	ENSMUSG00000014232+ENSMUSG00000005982+ENSMUSG00000093575:E049	-0.262893	0.829998	ENSMUSG00000014232+ENSMUSG00000005982+ENSMUSG00000093575:E027	-0.0872653	0.479818	ENSMUSG00000014232+ENSMUSG00000005982+ENSMUSG00000093575:E040	-0.399463	0.617217	0	0.04	-0.01	0.04	-0.01	0.03	-0.01	0.03
ENSMUSG00000005983	73261	1700037C18Rik	2810022L20Rik	protein_coding	E008		0.701826	E010		0.964291	E006		0.999975	E006		0.996492
ENSMUSG00000005986	68423	Ankrd13d	0710001P18Rik, AI430801	protein_coding	E007		0.312826	E010		0.237537	E008		0.64682	E008		0.636678			0.12	0.29	0.06	0.21																											0.02
ENSMUSG00000005994	22178	Tyrp1	b, brown, isa, TRP-1, TRP1, Tyrp	protein_coding
ENSMUSG00000006005	108989	Tpr	2610029M07Rik, C77892	protein_coding	E010	-0.263629	0.0857318	E009	-0.209352	0.51239	E050	0.214676	0.0210659	E050	0.167114	0.434114																																	0.01
ENSMUSG00000006007	20028	Pdc	Rpr-1, Rpr1	protein_coding
ENSMUSG00000006010	226499	BC003331	1810053E15Rik, odr-4, Odr4	protein_coding	E017	0.125393	0.808836	E004	0.104795	0.924829	E004		0.69628	E013	-0.174268	0.727167							-0.08	0.53
ENSMUSG00000006014	96875	Prg4	CACP, DOL54, JCAP, lubricin, MSF, SZP	protein_coding	E004		0.754576
ENSMUSG00000006019	71723	Dhx34	1200013B07Rik, 1810012L18Rik, Ddx34, mKIAA0134	protein_coding	E025	0.521804	0.709491	E012	0.250873	0.668561	E026		0.663477	E004	-0.235849	0.835503
ENSMUSG00000006021	70394	Kptn	2310042D10Rik, 2E4, C030013F01Rik	protein_coding	E001	0.572812	0.617066	E027		0.844825	E026		0.67019	E028	-0.200509	0.915709																											-0.11	0.42	-0.09	0.36	-0.1	0.43
ENSMUSG00000006024	108124	Napa	1500039N14Rik, a-SNAP, AW209189, hyh, RA81, SNAPA, SNARE	protein_coding	E007	-0.983173	0.0502944	E004	-0.0760181	0.818873	E008	-0.0721872	0.772005	E021	0.0494292	0.909963
ENSMUSG00000006050	24068	Sra1	AA959952, Sra, Srap, Straa1, Strra1	protein_coding	ENSMUSG00000006050+ENSMUSG00000001379:E018	-0.553398	0.0175169	ENSMUSG00000006050+ENSMUSG00000001379:E023	-0.640549	0.12094	ENSMUSG00000006050+ENSMUSG00000001379:E023		0.0809513	ENSMUSG00000006050+ENSMUSG00000001379:E023	-0.346685	0.704076	0	0	0	0	0	0	0	0
ENSMUSG00000006056	76815; 100505237	Calcoco2	2410154J16Rik, C77254, Ndp52, Ndp52l1	protein_coding
ENSMUSG00000006057	11951	Atp5g1		protein_coding	E010	0.417408	0.166177	E004		0.519319	E005		0.808982	E004	0.0793505	0.734783
ENSMUSG00000006058	27681	Snf8	D11Moh34	protein_coding	E004	-0.268148	0.00550419	E004	-0.162796	0.48595	E017		0.808645	E008	0.0911425	0.918816									0.16	2.86644e+08
ENSMUSG00000006095	66411	Tbcb	2410007D12Rik, AU041393, CG22, Ckap1, CKAPI	protein_coding	E002	-0.901595	0.504804	E010	-0.0435241	0.982125	E009	-0.0651036	0.690968	E009	-0.0729467	0.711414
ENSMUSG00000006127	19062	Inpp5k	C62, Pps, SKIP	protein_coding	E004	-0.175996	0.297802	E014	0.551364	0.684771	E026	0.193571	0.245041	E002	-0.404722	0.381417																																	-0.01
ENSMUSG00000006134	12929	Crkl	1110025F07Rik, AA589403, AI325100, Crkol	protein_coding	E001	0.0190453	0.95424	E002	-0.033448	0.999699	E002		0.999975	E001	-0.0312008	0.957914
ENSMUSG00000006143	69665	Upk3bl	2310043J07Rik	protein_coding
ENSMUSG00000006154	67425	Eps8l1	2310051G19Rik, 4632407K17Rik, AW060268, DRC3, EPS8R1	protein_coding	E029		0.325269	E037		0.704123	E037		0.962607	E038		0.999937	-0.19	0.78	-0.15	0.65			0.17	0.73	-0.34	1.86	-0.05	0.51			-0.34	2.51													-0.03	0.32			0.22
ENSMUSG00000006169	216705	Clint1	AI642036, AW537616, C530049I24Rik, Enth, Epn4, F630206G17Rik, mKIAA0171	protein_coding	E013	-0.400407	0.19006	E003	-0.142767	0.80365	E013	-0.468338	0.76048	E013	-0.534119	0.201239			-0.08	0.35	-0.1	0.68	-0.09	0.4
ENSMUSG00000006179	54373	Prss16	AI448615, TSSP	protein_coding
ENSMUSG00000006191	68916	Cdkal1	1190005B03Rik, 6620401C13Rik	protein_coding	E014	-0.30287	0.645567	E022		0.38646	E014		0.603154	E022		0.856492	-0.01	0.15	0.01	0.1	0	0.16
ENSMUSG00000006200	19202	Rhox6	AV213605, AW548842, Psx1	protein_coding
ENSMUSG00000006204	71395	5430419D17Rik		protein_coding
ENSMUSG00000006205	56213	Htra1	AI429470, HTRA, L56, Prss11, RSPP11	protein_coding	E008		0.710649
ENSMUSG00000006215	22642	Zbtb17	AA589413, Lp-1, Miz1, mZ13, Zfp100	protein_coding	E016	0.298433	0.495386	E008	-0.221615	0.546199	E030		0.779203	E025	0.148982	0.924462											-0.26	2.77	-0.08	0.31	-0.25	33.77															0.04	0.16	0.02
ENSMUSG00000006216	56365	Clcnkb	Clc-Ka, Clck2, CLCKB, Clcnk1l	protein_coding
ENSMUSG00000006218	277743	Fam131c	Gm693	protein_coding
ENSMUSG00000006219	74202	Fblim1	2410043F08Rik, Cal, Fblp1, Gt10, migfilin, migfilin(s)	protein_coding	E029	1.06958	0.206293	E010	-0.164724	0.916637	E003	0.075556	0.856528	E003	0.0852116	0.829337	0.06	0.24			0.08	1.02	0.04	0.22																									0.01
ENSMUSG00000006221	29818	Hspb7	27kDa, cvHsp, Hsp25-2	protein_coding
ENSMUSG00000006235	13857	Epor		protein_coding	E007		0.702474	E003		0.905111	E001		0.959412	E004		0.830467
ENSMUSG00000006241	67119	Ccdc159	2510048L02Rik	protein_coding	E011		0.821035
ENSMUSG00000006262	68473	Mob1b	1110003E08Rik, AU015450, B230364F10, Mobkl1a	protein_coding	E004	0.294562	0.0926426	E004	0.128344	0.936305	E004		0.641926	E007	0.255287	0.536323
ENSMUSG00000006269	110935	Atp6v1b1	Atp6b1, AW208839, D630003L15, D630030L16Rik, D630039P21Rik, Vpp-3, Vpp3	protein_coding
ENSMUSG00000006270	22326	Vax1		protein_coding
ENSMUSG00000006273	11966	Atp6v1b2	AI194269, AI790362, Atp6b2, HO57, R74844	protein_coding	E021	0.234654	0.502126	E021	0.448731	0.518207	E004	0.0577416	0.637286	E022	-0.0456835	0.738804
ENSMUSG00000006276	13859	Eps15l1	9830147J04Rik, AI593686, Eps15-rs, Eps15R	protein_coding	E004	-0.21548	0.540332	E018	0.154104	0.38646	E022	0.186197	0.408176	E022	0.146238	0.702247																													-0.03	0.13
ENSMUSG00000006281	21745	Tep1	Tp1	protein_coding	E037	-0.137223	0.385405	E026	0.193831	0.630753	E010	0.111641	0.686404	E010	0.14612	0.680317
ENSMUSG00000006288	219022	Ttc5		protein_coding	E008	0.106714	0.723806	E009	-0.118821	0.890907	E008		0.947008	E001	-0.0960714	0.744779
ENSMUSG00000006289	66246	Osgep	1500019L24Rik, GCPL-1, PRSMG1	protein_coding	E031	1.13974	0.303053	E030	-0.561653	0.546199	E008	-0.0351495	0.999975	E030	-0.382193	0.824261
ENSMUSG00000006299	227290	Aamp	Aamp-rs, AU040907	protein_coding	E006	-0.151197	0.182344	E006	-0.0662256	0.837754	E006	-0.0698395	0.913575	E006	-0.0803919	0.683473
ENSMUSG00000006301	69660	Tmbim1	2310061B02Rik, AA960455, AU024746, C78899, mKIAA4161, RECS1, Tmbib1	protein_coding	E015	-0.280026	0.169577	E014	-0.028481	0.831058	E011	0.344792	0.460546	E016	-0.0459543	0.648494									0.01	0.06
ENSMUSG00000006304	76709	Arpc2	2210023N03Rik, 34kDa, p34-Arc	protein_coding	E017	-0.220165	0.181688	E016	-0.0846378	0.943602	E016	-0.154955	0.836361	E016	-0.167075	0.685582																									0.02	0.41	0	0.03
ENSMUSG00000006307	75410	Wbp7	2610014H22Rik, mKIAA0304, Mll2, Wbp7	protein_coding	E045	0.131341	0.518444	E014	0.186018	0.694146	E024	-0.213156	0.432473	E009	0.136319	0.781125																																	0.02
ENSMUSG00000006310	58206	Zbtb32	4930524C15Rik, FAXF, FAZF, PLZP, Rog, Tzfp	protein_coding	E005		0.792475	E006		0.980903	E004		0.821791	E004		0.591745
ENSMUSG00000006311	14008	Etv2	Etsrp71	protein_coding
ENSMUSG00000006313	109637	Upk1a	1110031P12Rik, AU019298, C87192, Tspan21, Upk1	protein_coding	E001		0.791871
ENSMUSG00000006315	69804	Tmem147	2010004E11Rik, 5033425B17Rik, Nifie14	protein_coding	E006	0.109862	0.567453	E007	-0.0736187	0.953225	E007		0.887309	E006	0.146329	0.51046																									0	0	0	0	0	0	0	0
ENSMUSG00000006333	76846	Rps9	3010033P07Rik, AL022771, AL022885	protein_coding	E009	0.711086	0.000637738	E009	0.518649	0.0935225	E009	0.529074	0.166426	E009	0.483927	0.244439																																	0.01
ENSMUSG00000006335	69714	Tfpt	2400004F01Rik, AI450389, Amida, FB1	protein_coding	E006	0.214278	0.558939	E012		0.94961	E005		0.768425	E006		0.951833							0.11	0.59																									0.01
ENSMUSG00000006342	71733	Susd2	1200011D11Rik	protein_coding	E011		0.289647
ENSMUSG00000006344	23887	Ggt5	AI551243, GGL, GGT-REL, Ggtla1	protein_coding	E012		0.517229	E010		0.214106	E010		0.442321	E010		0.811564																	-0.02	0.15
ENSMUSG00000006345	14598	Ggt1	CD224, dwg, GGT, GGT 1, GGT-1, Ggtp	protein_coding	E038		0.857312
ENSMUSG00000006356	68337	Crip2	0610010I23Rik, AW743261, C77570, Crp, CRP2, CRP4, ESP1, Hlp	protein_coding	E007		0.492314	E005		0.767356	E002		0.864881	E005		0.764821
ENSMUSG00000006360	12925	Crip1	CRHP, Crip, CRP1	protein_coding	E005	0.093128	0.567747	E004	0.0524395	0.948487	E005		0.898121	E004	0.0296488	0.999937
ENSMUSG00000006362	12398	Cbfa2t3	A630044F12Rik, AI465270, AW229127, Cbfa2t3h, ETO-2, Eto2, MTGR2	protein_coding	E008		0.476468	E018		0.581108	E018		0.0765624	E008	0.412609	0.26395
ENSMUSG00000006369	14114	Fbln1		protein_coding
ENSMUSG00000006373	53328	Pgrmc1	AA415812, HPR6.6, PPMR, Vema	protein_coding	E003	-0.0710992	0.698024	E002	0.0164272	0.999699	E003		0.865367	E002	0.0264238	0.979296
ENSMUSG00000006378	14429; 26912	Gcat	Galnr3	protein_coding	E002		0.716446	E006		0.990028
ENSMUSG00000006386	21687	Tek	AA517024, Cd202b, Hyk, tie-2, Tie2	protein_coding
ENSMUSG00000006389	17480	Mpl	c-mpl, c-mpl-I, c-mpl-II, CD110, hlb219, TPO-R	protein_coding
ENSMUSG00000006390	54325	Elovl1	AA407424, BB151133, Ssc1	protein_coding	E008	-0.403492	0.215127	E012	0.603414	0.722761	E012	0.616075	0.601054	E008	-0.288296	0.911553	0	0	0	0	0	0	0	0					0	0	-0.01	0
ENSMUSG00000006392	80509	Med8	2210021A15Rik, AB041805, ARC32, MNCb-2386	protein_coding	E028	-2.45246	0.00282633	E024	0.18111	0.285575	E024	0.178002	0.360797	E024	0.207978	0.141808			0.03	0.13	0.03	0.12																			-0.01	0	-0.01	0	0	0	0	0	0
ENSMUSG00000006395	68180	Hyi	2700033B16Rik, 6430559E15Rik, HT036	polymorphic_pseudogene	E009	0.125301	0.950453	E009		0.679917	E016		0.989427	E008	-0.144279	0.807144
ENSMUSG00000006398	107995	Cdc20	2310042N09Rik, C87100, p55CDC	protein_coding	E012	-0.289747	0.0073894	E013		0.375858	E012		0.687633	E012	-0.27453	0.293307	-0.01	0.06	0.02	0.08	0.01	0.06	0	0.05																	-0.03	0.09
ENSMUSG00000006403	240913	Adamts4	3830423K05, ADAM-TS4, ADAMTS-2, ADMP-1, mKIAA0688	protein_coding	E011		0.964171
ENSMUSG00000006411	71740	Pvrl4	1200017F15Rik, Prr4	protein_coding	E007		0.426993	E010		0.665047	E007		0.778959	E007		0.296427			0.4	23.64			0.44	23.13
ENSMUSG00000006412	18637	Pfdn2	ESTM27, W48336	protein_coding	E007	0.085871	0.594001	E009	0.154805	0.970501	E001		0.802646	E008	0.104334	0.81726
ENSMUSG00000006418	81018	Rnf114	1110008J21Rik, AI225886, AW549494, Zfp228, Zfp313, Znf228	protein_coding	E005	0.245976	0.133846	E009	-0.0476822	0.928244	E005		0.483496	E005	0.179564	0.514451
ENSMUSG00000006423	77644	C330007P06Rik		protein_coding	E011	-0.789273	0.462026	E015		0.926102	E004		0.858849	E004	0.0509576	0.819573
ENSMUSG00000006435	18011	Neurl1a	2410129E16Rik, AI450910, AI481072, Neu1, Neur1, Neurl, Nlz, Rnf67	protein_coding	E007		0.993334
ENSMUSG00000006442	20810	Srm	AA407669, SpdST, SpdSy	protein_coding	E011	-1.0509	0.639833	E010	-0.0581588	0.930742	E010		0.732927	E004	0.200512	0.928839
ENSMUSG00000006445	13836	Epha2	AW545284, Eck, Myk2, Sek-2, Sek2	protein_coding
ENSMUSG00000006456	56275	Rbm14	1300007E16Rik, p16, p16K, PSP2, Sytip	protein_coding	ENSMUSG00000006456+ENSMUSG00000096370+ENSMUSG00000094936:E003	-0.88316	0.09812	ENSMUSG00000006456+ENSMUSG00000096370+ENSMUSG00000094936:E007	0.800594	0.127584	ENSMUSG00000006456+ENSMUSG00000096370+ENSMUSG00000094936:E019		0.623192	ENSMUSG00000006456+ENSMUSG00000096370+ENSMUSG00000094936:E007	0.624343	0.822425	0	0.03	0	0	0	0.03	0	0
ENSMUSG00000006457	11474	Actn3		protein_coding
ENSMUSG00000006462		A530013C23Rik		lincRNA	E001		0.80263	E003		0.877402	E003		0.999975	E003		0.999937
ENSMUSG00000006463	70605	Zdhhc24	5730496N17Rik, Leng4	protein_coding	E011		0.728647	E011		0.54369	E011		0.778914	E009		0.916912
ENSMUSG00000006464	52028	Bbs1	AI451249, D19Ertd609e	protein_coding	E005		0.388664	E001		0.999699	E001		0.999944	E001		0.999937
ENSMUSG00000006469	142681	Slc34a3	AI649385, naPi-2c, Npt2c, NptIIc	protein_coding
ENSMUSG00000006471	78797	Ndor1	4930447P04Rik, Ndor, NR1	protein_coding	E008	-0.177424	0.389577	E004	0.284933	0.76204	E039	0.584831	0.479711	E009	-0.209871	0.559885	0	0.07	0	0.06	-0.1	0.36																			-0.01	0.1	-0.25	73.89	-0.24	55.29	-0.02	0.12
ENSMUSG00000006476	56876	Nelf	Jacob, Nelf	protein_coding	E045	-0.170639	0.0228029	E033	0.164559	0.853552	E045		0.303196	E035	0.263732	0.817293	-0.09	0.34	-0.1	0.34	-0.01	0.04	-0.09	0.42											-0.09	0.33	-0.02	0.13	-0.09	0.3
ENSMUSG00000006488	19113	Prl7a1	AA407021, AA409971, AA410116, PLP-E, PLP-G, Prlpe, Prlpg	protein_coding
ENSMUSG00000006490	67310	Prl8a9	1600019F10Rik, PLP-Cbeta, Prlpc2	protein_coding
ENSMUSG00000006494	228026	Pdk1	B830012B01, D530020C15Rik	protein_coding	E025	0.155076	0.331386	E012	-0.186486	0.82389	E028		0.446391	E014	0.139151	0.87639	0	0.04	0.01	0.05	0.08	1.21	0	0.04
ENSMUSG00000006498	19205	Ptbp1	AA407203, AL033359, HNRPI, pPTB, Ptb, PTB-1, PTB2, PTB3, PTB4	protein_coding	E047	-0.169271	0.460857	E006	-0.265739	0.32533	E033	0.249495	0.408068	E047	-0.13991	0.681933	0.14	0.91			0.47	2.6			0.03	0.1	-0.01	0.04	-0.01	0.03	0.02	0.06
ENSMUSG00000006517	192156	Mvd	C78718, Mpd	protein_coding	E002	0.072788	0.642566	E005	-0.0729741	0.815975	E005	-0.0645137	0.811726	E005	-0.066568	0.894814
ENSMUSG00000006519	13057	Cyba	b558, nmf333, p22phox	protein_coding	E001	-0.0170545	0.771485	E001	-0.0151136	0.897767	E006	0.0504626	0.370914	E006	0.011878	0.997023	0	0	0.01	0	0.01	0	0.01	0
ENSMUSG00000006522	16426	Itih3	AW108094, Intin3, Itih-3	protein_coding
ENSMUSG00000006526	69179	Tmem110	1810038N08Rik, 2310014H19Rik, AW554125	protein_coding	E016	-0.167225	0.285021	E014		0.913393	E016		0.810169	E006		0.868612
ENSMUSG00000006527	54650	Sfmbt1	4930442N21Rik, 9330180L21Rik, AA536974, Sfmbt, Smr	protein_coding	E031	-0.907338	0.116444	E026	0.236302	0.81982	E014		0.383976	E016	-0.337684	0.783705
ENSMUSG00000006529	16424	Itih1	Intin1, Itih-1	protein_coding
ENSMUSG00000006538	16147	Ihh		protein_coding
ENSMUSG00000006542	241113	Prkag3	Amkg3, Ampkg3, AMPKg3L, AMPKg3S	protein_coding
ENSMUSG00000006546	12958	Cryba2	E130107M19Rik	protein_coding
ENSMUSG00000006567	11979	Atp7b	Atp7a, tx, WND	protein_coding	E001		0.985401
ENSMUSG00000006570	13215	Defb2	BD-2	protein_coding
ENSMUSG00000006574	20533	Slc4a1	Ae1, CD233, Empb3, l11Jus51	protein_coding
ENSMUSG00000006575	51799	Rundc3a	Rap2ip, RPIP-8, Rpip8	protein_coding	E025		0.938755	E027		0.989938
ENSMUSG00000006576	20536	Slc4a3	A930038D23Rik, Ae3	protein_coding
ENSMUSG00000006585	67177	Cdt1	2610318F11Rik, AW545653, C76791, Ris2	protein_coding	E004	0.0742523	0.619484	E005	-0.112285	0.79868	E002		0.541979	E005	-0.0874707	0.883902
ENSMUSG00000006586	12395	Runx1t1	Cbfa2t1h, ETO, MTG8	protein_coding
ENSMUSG00000006587	30927	Snai3	AI643946, Smuc, Zfp293	protein_coding	E003		0.967589	E002		0.999699	E002		0.999975	E002		0.999937																													-0.23	1
ENSMUSG00000006589	11821	Aprt	C85684	protein_coding	E002	-0.0140612	0.882125	E003	0.0219002	0.99535	E002	-0.0181657	0.966708	E001	-0.0119638	0.942673					0.03	1.58
ENSMUSG00000006599	14884	Gtf2h1	62kDa, AW743425, AW822074, BTF2 p62, C77871, p62	protein_coding	E018	-0.681889	0.528155	E022	0.164128	0.611113	E024	0.112556	0.826755	E016	-0.105727	0.885391	0	0	0	0	0	0	0	0
ENSMUSG00000006611	15216	Hfe	MR2	protein_coding	E004	0.204933	0.540389	E004	0.172864	0.757816	E001		0.615246	E001	-0.216597	0.803882			0	0.02	0.01	0.06	0.01	0.04
ENSMUSG00000006638		Abhd1		lincRNA	E003		1																																										0
ENSMUSG00000006641	330064	Slc5a6	E430023I20	protein_coding	E012	0.366077	0.258657	E016	0.301082	0.709894	E012		0.164949	E023	-0.367367	0.541222	-0.05	0.14	-0.02	0.19	-0.01	0.16	-0.05	0.18							0.11	0.51
ENSMUSG00000006642	69852	Tcf23	2010002O16Rik, bHLHa24, Out	protein_coding
ENSMUSG00000006649	54631	Nphs1	nephrin, NephrinB	protein_coding
ENSMUSG00000006651	11803	Aplp1		protein_coding	E009		0.318809	E013		0.135878	E003		0.910533	E012		0.770769															-0.03	0.24
ENSMUSG00000006673	69232	Qrich1	2610028H07Rik	protein_coding	E011	-0.0724541	0.454276	E008	0.233682	0.0279061	E004	0.0246693	0.920444	E008	0.134408	0.64071	0	0	0	0	0	0	0.01	0
ENSMUSG00000006675	74443	P4htm	4933406E20Rik, AI853847, BB128974, Ph-4	protein_coding
ENSMUSG00000006676	71472	Usp19	8430421I07Rik, AI047774, Zmynd9	protein_coding	E027	-0.135011	0.105842	E007	0.118843	0.235246	E009	0.109862	0.538098	E027	-0.0944656	0.620011	-0.01	0.04	-0.01	0.03	-0.01	0.04	-0.01	0.04																			-0.01	0.08					-0.17
ENSMUSG00000006678	18968	Pola1	AW321876, Pola	protein_coding	E024	-0.649476	0.0977617	E011		0.799988	E021		0.501987	E026	-0.421911	0.733079
ENSMUSG00000006699	12540	Cdc42	AI747189, AU018915	protein_coding	E001	-0.0210038	0.438247	E008	-0.264092	0.94136	E006	-0.0348844	0.486336	E003	0.0255565	0.869395
ENSMUSG00000006705	18771	Pknox1	D17Wsu76e, PREP1	protein_coding	E013	-0.283749	0.317751	E016	0.235363	0.784638	E016		0.743565	E015	0.191397	0.617217			-0.18	1.25	-0.26	3.05
ENSMUSG00000006711	210108	D130043K22Rik	4930451E12Rik, Kiaa0319	protein_coding
ENSMUSG00000006715	57441	Gmnn	AW546347, Gem	protein_coding	E017	-0.261417	0.514866	E007	0.109353	0.948269	E001		0.813672	E001	0.172643	0.776621																																	-0.01
ENSMUSG00000006717	66834	Acot13	0610006O17Rik, Them2	protein_coding	E002	0.0249511	0.955913	E001		0.82824	E002		0.893174	E001		0.984927
ENSMUSG00000006720	193452	Zfp184	4930500C15Rik	protein_coding
ENSMUSG00000006724	13115	Cyp27b1	Cp2b, Cyp1, Cyp27b, Cyp40, P450c1, Pddr, Vdd1, Vddr, VddrI, Vdr	protein_coding
ENSMUSG00000006728	12567; 640611	Cdk4	Crk3	protein_coding	E017	-0.588644	0.383911	E006	-0.0670988	0.927406	E011	0.704722	0.218551	E014	-0.0619622	0.92195	0.01	0.05	0	0.03	0	0.03	0	0.04	0.1	1.04
ENSMUSG00000006731	14421	B4galnt1	4933429D13Rik, Gal-NAc-T, Galgt1, GalNAc-T, GalNAcT, Ggm-2, Ggm2	protein_coding	E001	0.181857	0.544987	E010	0.0430517	0.611113	E001	0.0549975	0.984323	E004	0.0252653	0.909773	0	0	0	0	0	0	0	0
ENSMUSG00000006732	17299	Mettl1	2810012D02Rik	protein_coding	E013	0.276785	0.593148	E009		0.563042	E013		0.796483	E013		0.811762	0	0.04	0.03	0.08	0.01	0.06	-0.01	0.04
ENSMUSG00000006736	67125	Tspan31	2700085A14Rik, AW742554, Sas	protein_coding	E003	-0.0454892	0.768715	E006	0.0760559	0.967422	E003		0.980056	E003	-0.044125	0.955644
ENSMUSG00000006740	16573	Kif5b	AL022807, Khc, Khcs, Kns1, Ukhc	protein_coding	E005	0.174225	0.0997445	E027	0.212154	0.283154	E032	-0.370325	0.0765624	E005	0.160752	0.201239
ENSMUSG00000006763	78935	Saal1	5031425D22Rik, SPACIA1	protein_coding	E006		0.187352	E024		0.878707	E026		0.824698	E017		0.761916									0.14	0.67																							0
ENSMUSG00000006764	216343	Tph2	AU043594, Ntph	protein_coding
ENSMUSG00000006777	94179	Krt23	CK23, Haik1, K23, Krt1-23	protein_coding
ENSMUSG00000006782	12799	Cnp	Cnp-1, Cnp1, CNPase	protein_coding	E009	0.48001	0.794459	E001	-0.210251	0.809103	E001		0.999975	E008	0.0371511	0.763021
ENSMUSG00000006784	74407	Ttc25	4933404O19Rik	protein_coding
ENSMUSG00000006800	72043	Sulf2	2010004N24Rik, AU020235, mKIAA1247, MSulf-2	protein_coding	E030	0.0704746	0.360274	E015	-0.0848068	0.278561	E015	-0.0798619	0.527342	E021	0.0455469	0.410156
ENSMUSG00000006818	20656	Sod2	MnSOD, Sod-2	protein_coding	E005	-0.0578028	0.477365	E003	0.0616658	0.78496	E002	0.0315672	0.973563	E005	-0.0459103	0.923933
ENSMUSG00000006850	71983	Tmco6	2410015B03Rik	protein_coding	E007		0.258443	E007		0.775513	E004		0.644632	E009		0.445435																									-0.06	0.35
ENSMUSG00000006906	70527	Stambp	5330424L14Rik, 5730422L11Rik, Amsh, AW107289, mKIAA4198	protein_coding	E004	0.08334	0.863911	E004		0.920037	E002		0.981575	E004	0.112351	0.935962
ENSMUSG00000006920	14055	Ezh1	AW557915, mKIAA0388	protein_coding	E002	-0.0886147	0.516043	E015	-0.159781	0.846155	E010	0.200831	0.578581	E030	0.216103	0.575081	0	0.05	-0.01	0.03	0.01	0.04	-0.01	0.03																									0.07
ENSMUSG00000006930	15114	Hap1	HAP-1	protein_coding
ENSMUSG00000006931	66180	Leprel4	1110036O03Rik, AI413214, Sc65	protein_coding	E003		0.731261
ENSMUSG00000006932	12387	Ctnnb1	Bfc, Catnb, Mesc	protein_coding	E049	-0.0668023	9.68535e-07	E047	0.236363	0.520894	E048	0.0277517	0.638905	E040	0.0384421	0.441756																									0	0	0	0	0	0	0	0	0
ENSMUSG00000006941	68969	Eif1b	1500010M16Rik, 3110001N14Rik, Gc20	protein_coding	E003	0.0638277	0.763229	E003	0.0570627	0.943568	E002		0.997796	E003	0.0689574	0.928241
ENSMUSG00000006948	56640	Klk4	ESMP1, KLK-L1, Prss17, PSTS	protein_coding
ENSMUSG00000006958	12667	Chrd	Chd	protein_coding
ENSMUSG00000006998	21762	Psmd2	9430095H01Rik, AA407121, TEG-190, Tex190	protein_coding	E015	0.0741308	0.338636	E020	0.124285	0.555766	E007	-0.0628058	0.865	E017	0.0816595	0.767498
ENSMUSG00000007021	20974	Syngr3		protein_coding	E001		0.756722
ENSMUSG00000007029	22321	Vars	Bat6, D17H6S56E, G7a, Vars2	protein_coding	E037	-0.910822	0.0460689	E022	-0.162139	0.631238	E022	-0.217885	0.6943	E058	0.159824	0.565533	0	0	0	0	0	0	0	0	0.04	0.14			0.06	0.23											0	0	0	0.03	0.01	0.05	0	0.03
ENSMUSG00000007030	27762	Vwa7	C6orf27, D17H6S56E-3, G7c, NG37	protein_coding
ENSMUSG00000007033	15482	Hspa1l	Hsc70t, Msh5	protein_coding
ENSMUSG00000007034	70129	Slc44a4	2210409B01Rik, NG22	protein_coding
ENSMUSG00000007035	17687	Msh5	G7, Mut5	protein_coding	E026		0.3557
ENSMUSG00000007036	193742	Abhd16a	AI326074, Bat-5, Bat5, D17H6S82E, NG26	protein_coding	E019	-0.132698	0.279337	E019	-0.124423	0.636807	E020	-0.193223	0.607406	E017	-0.128292	0.431268	0	0	0	0	0	0	0	0
ENSMUSG00000007038	18010	Neu1	AA407268, AA407316, Aglp, Apl, Bat-7, Bat7, G9, Map-2, Neu, Neu-1	protein_coding	E007	-0.210105	0.000174099	E008	-0.0361333	0.931844	E007	-0.077357	0.981632	E005	0.04165	0.712148									0.06	24.99
ENSMUSG00000007039	51793	Ddah2	1110003M04Rik, AU019324, AW413173, Ddah, DDAH-2, DDAHII, G6a, NG30	protein_coding	E012		0.898462
ENSMUSG00000007041	114584	Clic1	Clcp, G6	protein_coding	E001	0.0571952	0.218574	E002	0.0249475	0.967119	E007	-0.195121	0.943665	E003	0.0344795	0.975828
ENSMUSG00000007050	27756	Lsm2	D17H6S56E-2, D17H6S56E2, Dmapl, Dmpkap, G7b, Sm-X5, SmX5, snRNP	protein_coding	E013	-0.134157	0.660764	E012		0.706904	E013		0.971639	E013	-0.135327	0.899378																									-0.1	0.3	-0.06	0.22			-0.02	0.3	-0.68
ENSMUSG00000007080	18973	Pole		protein_coding	E010	-0.384946	0.251713	E057	0.669042	0.0872606	E057		0.281736	E026	-0.517568	0.441034															0.08	0.48
ENSMUSG00000007097	98660	Atp1a2	Atpa-3, AW060654, mKIAA0778	protein_coding
ENSMUSG00000007107	27222	Atp1a4		protein_coding
ENSMUSG00000007122	12372	Casq1	CSQ, CSQ-1, CSQ1, sCSQ	protein_coding
ENSMUSG00000007207	20907	Stx1a	HPC-1	protein_coding
ENSMUSG00000007209	26368	Ceacam9	AA410097, AW545709, Cea-5, Cea5, mmCGM8	protein_coding
ENSMUSG00000007216	243372	Zfp775	C130032F08Rik, Znf775	protein_coding	E002		0.974952	E002		0.999699	E002		0.967911	E002		0.999937
ENSMUSG00000007279	56788	Scube2	4932442O19Rik, Cegf1, Cegp1	protein_coding
ENSMUSG00000007338	18120	Mrpl49	4833419D18Rik, Nof1	protein_coding	E002	0.0881481	0.771614	E004		0.95495	E001		0.633245	E002		0.919452	0	0	0.01	0.08	0	0	0	0
ENSMUSG00000007379	329727	Dennd2c	A930010I20Rik	protein_coding
ENSMUSG00000007411	17169	Mark3	1600015G02Rik, A430080F22Rik, C-TAK1, Emk2, ETK-1, ETK1, MPK10	protein_coding	E008	0.24991	0.0954194	E008	0.258245	0.0840821	E005		0.714518	E008	0.265078	0.0580197	-0.19	3.75					-0.23	18.64
ENSMUSG00000007415	67210	Gatad1	2310031E19Rik, 2810047M21Rik, 8430439A17Rik, 9130430G15Rik, B330017N08Rik, ENSMUSG00000073241, Odag	protein_coding	E001	-0.727982	0.350061	E004	0.0749975	0.963501	E007		0.833347	E009	-0.219291	0.961015
ENSMUSG00000007440	12936; 12942; 12943; 116731; 192161; 192164; 353234; 353236; 353237	Pcdha10	Cnr1, Crnr1, R75250	protein_coding
ENSMUSG00000007457	74248	2310003L06Rik		protein_coding
ENSMUSG00000007458	17113	M6pr	CD-MPR, Mpr46	protein_coding	E001	0.406047	0.0132957	E008	0.0364851	0.879276	E002	0.0799909	0.770716	E009	0.0374519	0.925315	0	0					0	0
ENSMUSG00000007476	241296	Lrrc8a	Lrrc8, mKIAA1437	protein_coding	ENSMUSG00000007476+ENSMUSG00000079484+ENSMUSG00000052533:E004	-0.185449	0.0187565	ENSMUSG00000007476+ENSMUSG00000079484+ENSMUSG00000052533:E005	0.299782	0.15588	ENSMUSG00000007476+ENSMUSG00000079484+ENSMUSG00000052533:E005	0.250359	0.399497	ENSMUSG00000007476+ENSMUSG00000079484+ENSMUSG00000052533:E086	-0.196044	0.476872	-0.09	1.05	-0.22	1.14	0.11	0.85	-0.23	0.9											0.17	0.82	-0.41	2.42	-0.36	2.07
ENSMUSG00000007480	17203	Mc5r		protein_coding
ENSMUSG00000007564	51792	Ppp2r1a	6330556D22Rik, PP2A, PR65	protein_coding	E027	-0.0792132	0.331741	E027	-0.0886653	0.579703	E029	-0.0524948	0.800422	E029	-0.0824091	0.285084																																	0
ENSMUSG00000007570	72775	Fance	2810451D06Rik, AI415634, AW209126	protein_coding	E013	-0.381073	0.441639	E017	-0.240126	0.820525	E007		0.506112	E013	-0.535043	0.444089									0.1	0.41					0.12	0.48
ENSMUSG00000007589	28113	Tinf2	AW552114, D14Wsu146e, Tin2	protein_coding	E001	-0.153818	0.682311	E009		0.980458	E003		0.992845	E006	-0.174171	0.718605
ENSMUSG00000007591	71099	Tssk4	1700020B19Rik, 4933424F08Rik, TSK-4, TSSK-4	protein_coding	E002		0.551278																		0.38	2.02			0.11	0.65	0.07	0.51																	-0.13
ENSMUSG00000007594	330790	Hapln4	9330174O11, Bral2, Lpr4	protein_coding	E005		0.979415
ENSMUSG00000007603	224907	Dus3l	AI662135, AW557805	protein_coding	E011	-0.193336	0.297717	E004	0.238962	0.676034	E011		0.897647	E006	-0.155338	0.791689
ENSMUSG00000007610	70359; 100862531	Gtpbp3	2410009F13Rik, AI607903	protein_coding	E014	-0.551696	0.687801	E015		0.859081	E024		0.910965	E023	0.0754612	0.965127																																	0.17
ENSMUSG00000007613	21812	Tgfbr1	Alk-5, ALK5, AU017191, TbetaR-I, TbetaRI	protein_coding	E019	-0.0695483	0.259537	E017	0.0822437	0.776049	E002	0.12218	0.814845	E017	0.0735805	0.894814																																	-0.13
ENSMUSG00000007617	26556	Homer1	homer-1, PSD-Zip45, SYN47, Ves-1, vesl-1	protein_coding	E026	-0.796994	0.132225	E007	0.482182	0.184704	E003		0.743565	E007	0.352873	0.668548
ENSMUSG00000007646	114714	Rad51c	R51H3, Rad51l2	protein_coding	E013		0.35237	E012		0.829669							-0.1	0.35			-0.1	0.36	0.41	1.82
ENSMUSG00000007653	14401	Gabrb2	AI834970, C030002O17Rik, C030021G16Rik, Gabrab2, Gabrb-2	protein_coding
ENSMUSG00000007655	12389	Cav1	Cav, Cav-1	protein_coding	E010	0.879975	0.0010419	E005	-0.0747142	0.97084	E010	0.572884	0.446641	E012	-0.0935229	0.782882	0	0.05	-0.01	0.07	0	0.04	0	0.05																	0	0.03	0	0.03			0.01	0.03	0.01
ENSMUSG00000007656	59046	Arpp19	19kDa, 2700024H10Rik, ARPP-19, Arpp12, AW559096	protein_coding	E025	-0.53934	0.101655	E022	0.287929	0.163883	E025	-0.521616	0.546169	E026	0.0834671	0.817293	0	0	0	0	0.01	0	0	0
ENSMUSG00000007659	12048	Bcl2l1	Bcl(X)L, bcl-x, Bcl-XL, Bcl-Xs, Bcl2l, BclX	protein_coding	E018	-0.963931	0.608935	E014	-0.32241	0.771154	E002		0.997215	E020	0.366437	0.877162																															0.16	1.47
ENSMUSG00000007670	16549	Khsrp	6330409F21Rik, Fbp2, Fubp2, Ksrp	protein_coding	E002	0.107213	0.580556	E012	0.0977527	0.778643	E003	0.164526	0.212341	E016	-0.142806	0.514451
ENSMUSG00000007682		Dio2	5DII, AI324267, DIOII	protein_coding
ENSMUSG00000007721	234388	Ccdc124	1810023B24Rik	protein_coding	E002	0.111165	0.556946	E004	-0.11676	0.775513	E005		0.991264	E002	0.108147	0.6569
ENSMUSG00000007739	12464	Cct4	2610204B21Rik, A45, C78323, Cctd	protein_coding	E008	0.12697	0.307588	E008	0.107957	0.612726	E023	-0.19387	0.122152	E010	-0.552503	0.428714	-0.02	0.07	-0.04	1.03	0.05	0.21	-0.04	1.21
ENSMUSG00000007777	66050	0610009B22Rik		protein_coding	E002		0.961739	E001		0.999699	E002		0.988014	E001		0.981833
ENSMUSG00000007783	78070	Cpt1c	6530437J22Rik, 9630004I06Rik	protein_coding	E001		0.995026
ENSMUSG00000007805	13345	Twist2	bHLHa39, Dermo1	protein_coding
ENSMUSG00000007812	72611	Zfp655	2700038I16Rik, 9030409O18Rik, mKIAA4222	protein_coding	E008	-0.0600893	0.491406	E008	-0.0490444	0.46716	E006		0.940995	E008	-0.0731819	0.458314			0.01	0.15			0.13	1.16
ENSMUSG00000007815	11848	Rhoa	Arha, Arha1, Arha2	protein_coding	E006	-0.0233977	0.167112	E002	0.0450658	0.739279	E001	0.067132	0.972552	E006	-0.00972754	0.765443
ENSMUSG00000007817	328365	Zmiz1	BC065120, E330020C23, ENSMUSG00000072684, Gm10397, I920194n01, Rai17, Zimp10	protein_coding	E029	-0.0967973	0.139034	E024	0.359822	0.261673	E024	0.349164	0.765383	E029	-0.0852844	0.276165
ENSMUSG00000007827	232339	Ankrd26	5730521P14Rik, BC008111, mKIAA1074	protein_coding	E014		0.674075	E003		0.633117	E034		0.999975	E011		0.999937							-0.37	2.48
ENSMUSG00000007833	69748	Aldh16a1	2410004H02Rik, AI452234, mFLJ00209	protein_coding	E024	0.230743	0.37351	E026	-0.151872	0.757072	E024	0.202599	0.603712	E031	-0.490634	0.841577	0	0.03																							0.11	0.61
ENSMUSG00000007836	77134	Hnrnpa0	1110055B05Rik, 3010025E17Rik, hnRNP A0, Hnrpa0	protein_coding
ENSMUSG00000007837	65116	Prrg2	1600014G02Rik, 2510041M06Rik, N4WBP1	protein_coding	E020	1.01388	0.326779	E021		0.373064	E021		0.473909	E021	0.85819	0.41572	0.06	0.22	0.04	0.14	0.27	2.53	0.13	0.6																									0.01
ENSMUSG00000007850	59013	Hnrnph1	AI642080, E430005G16Rik, Hnrnph, Hnrph1	protein_coding	E015	-0.832338	1.46213e-05	E036	0.338819	0.702036	E039	0.0617561	0.767507	E036	0.351974	0.630827	-0.02	0.09			-0.06	0.94	0.07	0.54	0.12	1000000000000	0	0	0.06	30.88	0	0	0.1	13.28			-0.07	0.8									0.06	2.53
ENSMUSG00000007867	76411	Ift43	1700019E19Rik, R75064	protein_coding	E001		0.353974	E004		0.892217	E006		0.751689	E004		0.732825	0.12	0.36	0.01	0.16	-0.01	0.16	0.06	0.24
ENSMUSG00000007872	15903	Id3	bHLHb25, Hlh462, Idb3	protein_coding	E003		0.80358	E007		0.312626	E003		0.873699	E003		0.880203
ENSMUSG00000007877	21393	Tcap	AI503981, AJ223855	protein_coding
ENSMUSG00000007880	93760	Arid1a	1110030E03Rik, BAF250a, Osa1, Smarcf1	protein_coding	E018	0.109393	0.519077	E006	-0.204691	0.56084	E002	0.0341776	0.77571	E021	-0.0689032	0.913489																									0	0.04	0.01	0.04	0	0.04	0	0.03
ENSMUSG00000007888	12931	Crlf1	CLF-1, CRLM3, NR6.1	protein_coding
ENSMUSG00000007891	13033	Ctsd	CatD, CD	protein_coding	ENSMUSG00000007891+ENSMUSG00000045777:E030	0.143467	0.00113316	ENSMUSG00000007891+ENSMUSG00000045777:E009	-0.463761	0.274329	ENSMUSG00000007891+ENSMUSG00000045777:E016	0.0671216	0.313218	ENSMUSG00000007891+ENSMUSG00000045777:E021	0.137201	0.914368																									0	0	0	0	0	0	0	0
ENSMUSG00000007892	56040; 279067	Rplp1	2410042H16Rik, Arpp1, C430017H15Rik	protein_coding	E003	-0.0370419	0.74179	E003	-0.0416233	0.874332	E001	0.028959	0.988866	E003	-0.0452901	0.841642
ENSMUSG00000007907	70977	Cabs1	4931407G18Rik, AI428159, Clph	protein_coding
ENSMUSG00000007908	208982	Hmgcll1	BC037381	protein_coding
ENSMUSG00000007944	73032	Ttc9b	2900074C18Rik	protein_coding
ENSMUSG00000007946	11859	Phox2a	Arix, Phox2, Pmx2, Pmx2a	protein_coding
ENSMUSG00000007950	64296	Abhd8	0910001L24Rik, AB030191	protein_coding	E005		0.726364	E001		0.776049	E004		0.996043	E002		0.788574
ENSMUSG00000007987	67286	Rabl5	3110017O03Rik, AI835745, AI847427	protein_coding	E003		0.565688	E005		0.939796	E003		0.874144	E003		0.626024
ENSMUSG00000007989	14365	Fzd3	AU020229, D930050A07Rik, Fz3	protein_coding
ENSMUSG00000008028	69349	1700008O03Rik		protein_coding
ENSMUSG00000008035	68041	Mid1ip1	3110038L01Rik, Mig12, S14R	protein_coding	E002	-0.608011	0.890194	E008		0.974841	E008		0.999975	E008		0.86906
ENSMUSG00000008036	232910	Ap2s1	AI043088	protein_coding	E006	0.0409152	0.832494	E004	-0.038252	0.665047	E003	0.439832	0.695363	E003	0.383983	0.765335
ENSMUSG00000008090	116701	Fgfrl1	FGFR5, FGFR5beta, FGFR5gamma	protein_coding	E007		0.61611	E007		0.933156	E007		0.999975	E007		0.999937	-0.09	0.32	0.11	0.56	0.03	0.35	-0.04	0.31
ENSMUSG00000008129	74666	4930432K21Rik		protein_coding	E009		0.775409																0.01	1.03
ENSMUSG00000008136	14200	Fhl2	C76204, SLIM3	protein_coding
ENSMUSG00000008140	69683	Emc10	2310044H10Rik, 5430410O10Rik, Inm02, Mirta22	protein_coding	E007	-0.804928	0.514685	E008	0.114661	0.776557	E006	0.268464	0.902749	E002	-0.414595	0.686548
ENSMUSG00000008153	232370	Clstn3	Cs3, Cst-3, CSTN3, mKIAA0726	protein_coding
ENSMUSG00000008167	68628	Fbxw9	1110017H11Rik, Fbw9	protein_coding	E015		0.415121	E008		0.56084	E020		0.473909	E008		0.920902									0.11	0.51
ENSMUSG00000008193	272382	Spib	Spi-B	protein_coding
ENSMUSG00000008200	55935	Fnbp4	FBP30, Fnbp30, mKIAA1014	protein_coding	E036	-0.0910468	0.271591	E027	-0.513008	0.413209	E011	-0.227666	0.667935	E027	-0.498328	0.433844					0.04	0.21	0.16	0.67																									-0.02
ENSMUSG00000008206	67260	Lass4	2900019C14Rik, Lass4, Trh1	protein_coding
ENSMUSG00000008226	74616	Scrn3	4833415E20Rik, AI427019, AV002033, Ses3	protein_coding	E012	0.248175	0.0980533	E018		0.316632	E012		0.878012	E019	-0.103517	0.962903
ENSMUSG00000008301	56698	Phax	2810055C14Rik, 4933427L19Rik, AU018701, AU018854, D18Ertd65e, p55, Rnuxa	protein_coding	E008	0.0656558	0.914967	E009		0.78429	E009		0.760596	E004	-0.125502	0.989745
ENSMUSG00000008305	21885	Tle1	C230057C06Rik, Estm14, Grg1, Tle4l	protein_coding	E030	0.178859	0.591004	E029	-0.167274	0.856081	E006		0.69873	E006	-0.178893	0.882667					0.15	3.96
ENSMUSG00000008307	77036	1700109H08Rik		protein_coding	E001		0.775977																																										-0.01
ENSMUSG00000008318	320100	Relt	E430021K24Rik, Tnfrsf19l	protein_coding	E003	0.101136	0.739186	E003	0.189467	0.615149	E019	0.279645	0.976605	E020	0.256446	0.869395	-0.01	0.04	0	0.04	-0.01	0.03	-0.01	0.04
ENSMUSG00000008333	20639	Snrpb2	2810052G09Rik	protein_coding	E010	0.116597	0.540577	E009	-0.139881	0.311234	E009		0.888571	E011	0.0974443	0.770172
ENSMUSG00000008348	22190	Ubc	2700054O04Rik, AI194771, Rps27a, TI-225, Uba52, Ubb	protein_coding	E004	-0.850485	0.00821072	E004	-0.48266	0.564687	E001	-0.13283	0.996043	E001	-0.153382	0.989093																									0	0	0	0	0	0	0	0
ENSMUSG00000008373	68988	Prpf31	1500019O16Rik, 2810404O06Rik, AW554706, PRP31, RP11	protein_coding	E016	0.176724	0.276401	E015	0.243402	0.464417	E018	0.218598	0.390313	E016	0.238185	0.201239															0.05	0.68
ENSMUSG00000008384	55942	Sertad1	1110032C13Rik, AV000455, AW456625, Sei-1, Sei1, TRIP-Br1	protein_coding	E003		0.767101	E004		0.934105	E001		0.999975	E001		0.999937
ENSMUSG00000008393	52502	Carhsp1	1200011K09Rik, Crhsp-24, D16Ertd465e	protein_coding	E003	0.162345	0.289996	E001	0.00564951	0.999699	E003		0.65532	E002	0.0531763	0.971022
ENSMUSG00000008398	13713	Elk3	D430049E23Rik, Erp, Etrp, Net, Sap-2	protein_coding	E001	-0.0599603	0.754698	E001	0.0940715	0.767356	E003		0.947008	E005	0.121785	0.719127			-0.01	0.04																					0	0.04	0.02	0.08	0	0.05	0	0.06
ENSMUSG00000008429	80517	Herpud2	5031400M07Rik, AB041580	protein_coding	E001	-0.115772	0.514813	E005	-0.066565	0.915393	E002		0.962602	E002	0.0746993	0.981152
ENSMUSG00000008435	108841	Rdh13	8430425D21Rik	protein_coding	ENSMUSG00000008435+ENSMUSG00000077965:E018	1.93337	0.0354291	ENSMUSG00000008435+ENSMUSG00000077965:E005		0.840495	ENSMUSG00000008435+ENSMUSG00000077965:E002		0.852064	ENSMUSG00000008435+ENSMUSG00000077965:E019	0.18884	0.923306
ENSMUSG00000008438	56622	Adam21	Adam31	protein_coding
ENSMUSG00000008450	68051; 621832; 668830	Nutf2	2700067I02Rik, AI115459, AI413596, AW546000, Ntf2, Ntf3, PP15	protein_coding	E005		0.714234	E001		0.999699	E005		0.999975	E005		0.991369
ENSMUSG00000008461	14343	Fut1	H	protein_coding
ENSMUSG00000008475	67771	Arpc5	5830443F10Rik, p16-Arc	protein_coding	E005	0.0419404	0.701826	E003	-0.0501496	0.71395	E003	-0.0309328	0.970698	E003	-0.0325622	0.917999
ENSMUSG00000008482	67504	Rnf151	1700010O16Rik, AV047371	protein_coding
ENSMUSG00000008489	15569	Elavl2	Hub, mel-N1	protein_coding
ENSMUSG00000008496	18987	Pou2f2	Oct-2, Oct2a, Oct2b, Otf-2, Otf2	protein_coding	E001		0.450968
ENSMUSG00000008540	56615	Mgst1	1500002K10Rik, Gst	protein_coding	E016	-0.306724	0.00328646	E015	-0.0683723	0.776049	E015	-0.162653	0.761023	E011	0.0453762	0.428714	0	0	0	0	0	0	0	0
ENSMUSG00000008575	18028	Nfib	6720429L07Rik, E030026I10Rik	protein_coding	E002		0.877235
ENSMUSG00000008590	57014	Htr3b	5-HT3B	protein_coding
ENSMUSG00000008601	53868	Rab25	AV012978	protein_coding	E001		0.999043
ENSMUSG00000008604	94232	Ubqln4	A1u, A1Up, AI663987, CIP75, UBIN	protein_coding	E007	-0.226051	0.349921	E010	0.115089	0.843638	E005		0.980056	E007	-0.101389	0.962242
ENSMUSG00000008658	268859	Rbfox1	A2bp, A2bp1, fox-1, Hrnbp1	protein_coding
ENSMUSG00000008668	20084	Rps18	H-2Ke3, H2-Ke3, Ke-3, ke3	protein_coding	E015	-0.352818	0.415557	E015	-0.271336	0.848948	E015	-0.285831	0.807442	E019	-0.292592	0.974689
ENSMUSG00000008682	110954; 434434	Rpl10	D0HXS648, DXHXS648, DXHXS648E, QM, QM16	protein_coding	ENSMUSG00000064981+ENSMUSG00000008682:E009	0.195242	0.231536	ENSMUSG00000064981+ENSMUSG00000008682:E013	-0.191099	0.361546	ENSMUSG00000064981+ENSMUSG00000008682:E019		0.772996	ENSMUSG00000064981+ENSMUSG00000008682:E019	0.408009	0.265654			-0.1	0.59	-0.25	0.96					0.01	0.03																					0
ENSMUSG00000008683	267019; 100042335	Rps15a	A630031B11Rik	protein_coding	E009	-0.0278838	0.733059	E011	-0.471003	0.500585	E001	-0.249226	0.961239	E009	-0.0185399	0.894814
ENSMUSG00000008690	52683	Ncaph2		protein_coding	E021	-0.101645	0.298867	E021	-0.185185	0.0865413	E011	-0.167895	0.731689	E036	0.379617	0.590458									0.27	8.46	-0.1	4.75	-0.1	1.77											0.04	11.31	0.02	0.08	0.06	0.59	0.05	0.62	-0.13
ENSMUSG00000008730	15257	Hipk1	1110062K04Rik, Myak	protein_coding	E013	0.111085	0.229688	E010	-0.166778	0.33241	E007	0.0844051	0.623192	E007	0.0723454	0.684746	0.01	0	0	0	0	0	0	0																							0	0.04
ENSMUSG00000008734	64297	Gprc5b	AW125761, Raig2	protein_coding	E003		0.741247
ENSMUSG00000008763	17156	Man1a2	AI428775, AI528764, AI854422, Man1b, PCR2	protein_coding	E011	0.413622	0.0176094	E011	0.258934	0.536601	E011	0.170317	0.889393	E011	0.241048	0.487082							-0.01	0.04
ENSMUSG00000008789	73250	Ceacam5	1600029H12Rik, Psg30	protein_coding
ENSMUSG00000008813	219038	Tppp2	Gm1790, Gm77	protein_coding
ENSMUSG00000008822	66204	Acyp1	1110039O14Rik, AI325944	protein_coding	E002		0.715239	E005		0.991504	E003		0.399714	E003		0.993902
ENSMUSG00000008843	57255	Cldn13	2500004B14Rik	protein_coding
ENSMUSG00000008845	93671	Cd163	CD163v2, CD163v3	protein_coding	E007		0.990136
ENSMUSG00000008855	15184	Hdac5	AI426555, Hdac4, mHDA1, mKIAA0600	protein_coding	E011	1.90033	0.115793	E064	0.334449	0.808201	E012	0.16883	0.777623	E054	-0.205157	0.405233	-0.1	0.41					0.05	0.24	-0.03	0.2	0.08	4.2	0.18	0.62											-0.04	0.15					-0.11	0.98	-0.03
ENSMUSG00000008859	56044	Rala	3010001O15Rik, AW322615, Ral, Rasl1	protein_coding	E001	-0.240481	6.13239e-06	E004	0.051811	0.99068	E001		0.999975	E001	-0.0364515	0.973582
ENSMUSG00000008874	403395	Clec3a	1110019O10Rik, Clecsf1, Gm796	protein_coding	E003		0.611155
ENSMUSG00000008892	22335	Vdac3		protein_coding	E007	-0.299171	0.881086	E004		0.990009	E010		0.993882	E001		0.74001
ENSMUSG00000008932	242607	Slc1a7	A930031E15Rik, Eaat5	protein_coding
ENSMUSG00000008958	21427	Vps72	Tcfl1, YL-1	protein_coding	E002	0.456064	0.335817	E009	-0.133381	0.62581	E003		0.933508	E002	0.499779	0.775278																									-0.07	0.36	-0.07	0.35	-0.1	1.89
ENSMUSG00000008976	14390	Gabpa	GABPalpha	protein_coding	E018	-0.186902	0.107514	E003	-0.266865	0.852392	E003		0.680824	E020	-0.105212	0.783878	0.02	0.1
ENSMUSG00000008999	12162	Bmp7	OP1	protein_coding
ENSMUSG00000009013	56455	Dynll1	Dlc8, Dnclc1, Pin	protein_coding	E002	-0.294559	0.456977	E002	-0.24674	0.62991	E003	-0.0398527	0.623192	E002	-0.182272	0.917999
ENSMUSG00000009030	67466	Pdcl	1200011E13Rik, AW108059, PhLP1	protein_coding	E001	-1.34189	0.0183262	E009	0.386937	0.87893	E010		0.871817	E010	0.150029	0.915709	-0.11	3.72	-0.07	0.61			-0.08	0.84
ENSMUSG00000009035	223693	Tmem184b	2610507A11, 4732495E13Rik	protein_coding	E006	0.0901694	0.672285	E006	0.104383	0.779762	E001	0.0137792	0.891704	E003	0.0761308	0.733663
ENSMUSG00000009047		Gm5965		protein_coding
ENSMUSG00000009070	71236	Rtdr1	4933431K05Rik	protein_coding
ENSMUSG00000009073	18016	Nf2	merlin	protein_coding	E003	-0.23429	0.0643419	E003	-0.168847	0.517679	E003	-0.214088	0.326428	E003	-0.161715	0.727232			0.04	0.17
ENSMUSG00000009075	192650	Cabp7		protein_coding
ENSMUSG00000009076	67178	Zmat5	2610510L01Rik, D11Bwg0572e, D11Bwg1548e	protein_coding	E008	-0.856412	0.376021	E001		0.907606	E007		0.985391	E001		0.974689
ENSMUSG00000009079	14030	Ewsr1	AU018891, Ews, Ewsh	protein_coding	E023	-0.428039	0.0493536	E022	0.176365	0.357963	E016	-0.0856662	0.746802	E018	-0.12929	0.435065			0	0	0	0	0	0
ENSMUSG00000009090	11764	Ap1b1	Adtb1, b2b1660Clo	protein_coding	E002	0.444095	0.386123	E027	-0.121547	0.830018	E002	0.568274	0.368184	E014	-0.118399	0.693433	0.01	0.04	0	0.04	0	0.05	0	0.04																									0
ENSMUSG00000009092	70377	Derl3	1810006I20Rik, 1810063P04Rik, derlin-3, IZP6	protein_coding	E007		0.00639158	E007		0.670428	E007		0.609459	E007		0.881474
ENSMUSG00000009093	75886	Gstt4	4930583C14Rik, AI507011	protein_coding
ENSMUSG00000009097	21380	Tbx1		protein_coding
ENSMUSG00000009108	14686	Gnat2	AW490837, Gnat-2, Gt-2, Tcalpha	protein_coding
ENSMUSG00000009112	94044	Bcl2l13	BCL-RAMBO, E430016C20Rik, Mil-1, Mil1	protein_coding	E005	0.107157	0.782465	E007	0.0260169	0.96949	E001		0.958768	E004	-0.0754038	0.989745
ENSMUSG00000009114	76964	2610028H24Rik	ORF67	protein_coding
ENSMUSG00000009115	76573	1700027D21Rik	1700022B01Rik, 1700027D21Rik, AA062323	protein_coding
ENSMUSG00000009145	93838	Dqx1	2310066E11Rik	protein_coding	E005		0.416839	E012		0.999699
ENSMUSG00000009185	20307; 100503254	Ccl8	1810063B20Rik, AB023418, HC14, MCP-2, Mcp2, Scya8	protein_coding
ENSMUSG00000009207	69605	Lnp	2310011O18Rik, 4921514L11Rik, 9530051D01Rik, AI666268, Ul, ulnaless	protein_coding	E024	-0.824704	0.0443451	E009		0.822137	E018		0.677735	E026		0.848334	0.01	0.53	0.17	0.75	0.05	0.47	0.37	2.88											0.01	0.38	-0.06	0.38	0.33	10.24
ENSMUSG00000009210	75573	2310007L24Rik		protein_coding
ENSMUSG00000009214	66139	Tmem8c	1110002H13Rik, AI131587	protein_coding
ENSMUSG00000009216	109349	Fam163b	C630035N08Rik	protein_coding
ENSMUSG00000009246	56843	Trpm5	9430099A16Rik, LTrpC-5, Ltrpc5, Mtr1	protein_coding
ENSMUSG00000009248	17173	Ascl2	2410083I15Rik, bHLHa45, Mash2	protein_coding
ENSMUSG00000009281	71660	Rarres2	0610007L05Rik, AI303516	protein_coding
ENSMUSG00000009291	108705	Pttg1ip	1810010L20Rik, AI314311, AU018448, C79540	protein_coding	E013	0.121756	0.332886	E018	-0.161707	0.393402	E003	0.104302	0.811419	E012	0.477399	0.781125			0.01	0	0.01	0	0.01	0
ENSMUSG00000009292	28240	Trpm2	9830168K16Rik, C79133, LTRPC2, Trp7, TRPC7, Trrp7	protein_coding	ENSMUSG00000093784+ENSMUSG00000009292+ENSMUSG00000093443:E040	0.62283	0.00341186	ENSMUSG00000093784+ENSMUSG00000009292+ENSMUSG00000093443:E040	0.653124	0.12094	ENSMUSG00000093784+ENSMUSG00000009292+ENSMUSG00000093443:E040		0.150714	ENSMUSG00000093784+ENSMUSG00000009292+ENSMUSG00000093443:E007	0.641457	0.330088									-0.04	0.37	0.06	0.41	0.1	0.42
ENSMUSG00000009293	22213	Ube2g2	1110003O05Rik, D10Xrf369, UBC7, Ubc7p	protein_coding	ENSMUSG00000089424+ENSMUSG00000020265+ENSMUSG00000009293:E013	-0.759188	0.301452	ENSMUSG00000089424+ENSMUSG00000020265+ENSMUSG00000009293:E042	0.133822	0.494373	ENSMUSG00000089424+ENSMUSG00000020265+ENSMUSG00000009293:E018	-0.119588	0.0595598	ENSMUSG00000089424+ENSMUSG00000020265+ENSMUSG00000009293:E037	0.228828	0.114626	0	0	0	0.03	0	0.02	0	0
ENSMUSG00000009350	17523	Mpo	mKIAA4033	protein_coding
ENSMUSG00000009356	76113	Lpo	5830499B15Rik	protein_coding
ENSMUSG00000009376	17295	Met	AI838057, c-Met, HGF, HGFR, Par4	protein_coding	E005	-0.905263	0.090302	E035		0.630753	E035		0.804773	E035		0.265654			-0.08	0.64			0.15	1.17
ENSMUSG00000009378	240638	Slc16a12	3230401A21, AW210596	protein_coding
ENSMUSG00000009394	20965	Syn2	2900074L19Rik, AI836018, AI841723	protein_coding
ENSMUSG00000009406	13712	Elk1	Elk-1	protein_coding	ENSMUSG00000001134+ENSMUSG00000009406:E014	0.350521	0.527079	ENSMUSG00000001134+ENSMUSG00000009406:E002	-0.115287	0.942134	ENSMUSG00000001134+ENSMUSG00000009406:E006		0.846499	ENSMUSG00000001134+ENSMUSG00000009406:E001	0.047903	0.925642																																	0.01
ENSMUSG00000009418	215690	Nav1	9530089B19, 9930003A20Rik, C230080M11Rik, mKIAA1151, Pomfil3, steerin-1, Unc53h1	protein_coding	E030	0.962856	0.000116519	E030	1.10608	2.00086e-10	E030	0.944939	8.49502e-05	E030	0.881391	2.86758e-06	0.21	0.95	-0.02	0.07	-0.23	1.66	0	0.05																									0.07
ENSMUSG00000009470	238799	Tnpo1	AU021749, D13Ertd688e, IPO2, Kpnb2, MIP, MIP1, TRN	protein_coding	E001	-0.147651	6.61354e-05	E005	0.223307	0.487903	E005	0.189201	0.845859	E014	0.122618	0.575901
ENSMUSG00000009471	17927	Myod1	AI503393, bHLHc1, MYF3, MyoD, Myod-1	protein_coding
ENSMUSG00000009487	18419	Otog	4932420K09, Otgn, twt	protein_coding
ENSMUSG00000009535	67897	Rnmt	2610002P10Rik, AI848273, mKIAA0398, Rg7mt1	protein_coding	E018	-0.669481	0.0460689	E019	0.414668	0.931424	E011		0.93517	E019	0.675281	0.287113
ENSMUSG00000009545	16535	Kcnq1	AW559127, Kcna9, KVLQT1	protein_coding
ENSMUSG00000009549	20813; 100504988	Srp14	14kDa, AW536328	protein_coding	E009	0.0356819	0.792582	E007	0.538393	0.734068	E012	-0.0539078	0.999975	E004	-0.0233862	0.997849
ENSMUSG00000009551	70730	6330409D20Rik	AA517851	protein_coding	E005		0.978116
ENSMUSG00000009555	107951	Cdk9	PITALRE	protein_coding	ENSMUSG00000093280+ENSMUSG00000009555+ENSMUSG00000092925:E018	-0.299348	0.144118	ENSMUSG00000093280+ENSMUSG00000009555+ENSMUSG00000092925:E001	-0.288955	0.555237	ENSMUSG00000093280+ENSMUSG00000009555+ENSMUSG00000092925:E016	-0.13286	0.433616	ENSMUSG00000093280+ENSMUSG00000009555+ENSMUSG00000092925:E021	0.530985	0.156316	0	0	0	0	0	0	0	0																									0.12
ENSMUSG00000009563	30933	Tor2a	Prosalusin	protein_coding	E022	0.164908	0.305374	E015	-0.128695	0.535819	E022		0.575546	E022	0.165272	0.634918	-0.02	0.09	-0.02	0.06			-0.02	0.06
ENSMUSG00000009566	14287	Fpgs	AA408187	protein_coding	E004	0.150555	0.83648	E004		0.90245	E032		0.458912	E010	-0.285074	0.65108
ENSMUSG00000009569	239719	Mkl2	ENSMUSG00000075401, Gt4-1, mKIAA1243, MRTF-B, Mrtfb	protein_coding	E018	0.0840744	0.258854	E004	-0.250499	0.808201	E012	0.246428	0.853381	E017	-0.152069	0.742528
ENSMUSG00000009575	12419	Cbx5	2610029O15Rik, C75991, HP1, Hp1a, Hp1alpha	protein_coding	E001	-0.0172109	0.862075	E003	-0.10962	0.953858	E013		0.986305	E007	-0.14204	0.919392					0.2	1.86	0.08	0.57
ENSMUSG00000009580	69592	Odam	2310011G06Rik, APIN	protein_coding
ENSMUSG00000009585	80287	Apobec3	Arp3, BC003314, Cem15, Rfv3	protein_coding	E003	0.855723	0.49061	E042	0.446754	0.415025	E038		0.209293	E011	-0.245853	0.811786	-0.01	0.03	0.02	0.11			0.01	0.08	0.09	1.42					0.13	13.8
ENSMUSG00000009588	20445	St6galnac1	Siat7a	protein_coding
ENSMUSG00000009596	74469	Taf7l	4933438I11Rik, 50kDa, Taf2q	protein_coding
ENSMUSG00000009614	192166	Sardh		protein_coding	E003		0.790157	E017		0.829081	E001		0.997346				-0.11	0.36	-0.06	0.29	-0.05	0.29	-0.08	0.34
ENSMUSG00000009621	22325	Vav2	2810040F13Rik, AI847175	protein_coding	E019	-0.661006	0.184562	E032	0.22468	0.518223	E029	-0.0858293	0.739906	E019	-0.416083	0.618814	0	0	-0.01	0.05	0	0	0.01	0
ENSMUSG00000009628	104271	Tex15	2210014E14Rik, AL022622, AU022940	protein_coding
ENSMUSG00000009630	19053	Ppp2cb	AI115466, D8Ertd766e, PP2Ac	protein_coding	E002	0.0765854	0.289647	E003	0.0560376	0.967051	E002	0.0802402	0.313372	E002	0.0499379	0.851334
ENSMUSG00000009633	14373	G0s2	AI255151, AV006465	protein_coding	E001		0.963173	E001		0.995153	E001		0.999975	E001		0.999937
ENSMUSG00000009640	66233	Dmap1	1500016M21Rik, Dmtap1, DNMAP1, DNMTAP1, mKIAA1425	protein_coding	E023	-0.859112	0.693281	E005		0.844825	E009		0.828385	E007	-0.180052	0.851062
ENSMUSG00000009646	69836	Pla2g12b	2010002E04Rik, hlb218, Pla2g13	protein_coding
ENSMUSG00000009647	215999	Ccdc109a	2010012O16Rik, AV064928, C10orf42, Ccdc109a, D130073L02Rik, Gm64	protein_coding	E008		0.829804	E008		0.853218	E001		0.999975	E001		0.999362
ENSMUSG00000009654	18302	Oit3	EF-9, LZP	protein_coding	E005		0.588606
ENSMUSG00000009670	83558	Tex11	4930565P14Rik, BB024231, ZIP4H	protein_coding
ENSMUSG00000009681	110279	Bcr	5133400C09Rik, AI561783, AI853148, mKIAA3017	protein_coding	E010		0.581859
ENSMUSG00000009687	18301	Fxyd5	EF-8, Oit2, RIC	protein_coding	E022	-0.256126	0.00468955	E030	-0.120072	0.611113	E030	-0.211222	0.592989	E030	-0.148612	0.411318
ENSMUSG00000009731	16506	Kcnd1	1110037K09Rik, Kca2-1, Kv4.1, mShal1, Shal	protein_coding	E004		0.739186	E005		0.990006
ENSMUSG00000009733	21422	Tfcp2	CP-2, CP2, D230015P20Rik, LBP-1c, LBP-1d, LBP1, LSF, Tcfcp2, UBP-1	protein_coding	E003		0.822612	E003		0.788897	E008		0.90131	E009		0.734783																																	-0.07
ENSMUSG00000009734	218030	Pou6f2	D130006K24Rik, RPF-1	protein_coding
ENSMUSG00000009739	19009	Pou6f1	2310038G18Rik, Brn5.0, C79593, cns-1, Emb	protein_coding	E035	-0.416269	0.789745	E014		0.864697	E012		0.953304	E008		0.971318
ENSMUSG00000009741	22221	Ubp1	Cp2b, LBP-1a, LBP-1b, NF2d9	protein_coding	E013	-0.151376	0.20291	E003	-0.149684	0.763014	E013	-0.161477	0.40277	E013	-0.199372	0.323222							-0.13	2.24
ENSMUSG00000009772	74137	Nuak2	1200013B22Rik, mKIAA0537, Omphk2, Snark	protein_coding	E003	0.654838	0.557065	E007	-0.0953539	0.812645	E008	-0.123534	0.64913	E004	-0.0853948	0.927312			0.06	0.48	0.06	0.55	0.07	0.84
ENSMUSG00000009828	56542	Ick	2210420N10Rik, AI848300, Mrk	protein_coding	E024	0.289812	0.272026	E029	-0.149598	0.849762	E027		0.814681	E024	0.296421	0.457039
ENSMUSG00000009863	67680; 101056348	Sdhb	0710008N11Rik	protein_coding	E004	0.0529603	0.709089	E004	0.0681433	0.62991	E001	-0.206319	0.887309	E011	-0.0512015	0.869395
ENSMUSG00000009876	84682	Cox4i2	Cox4b, CoxIV-2	protein_coding
ENSMUSG00000009894	67826	Snap47	1110031B06Rik, SNAP-47	protein_coding	E011		0.392984	E006		0.962362	E010		0.95623	E011		0.827734																																	-0.15
ENSMUSG00000009900	22416	Wnt3a	vt, Wnt-3a	protein_coding
ENSMUSG00000009905	70750	Kdsr	6330410P18Rik, 9430079B08Rik, Fvt1	protein_coding	E004	0.151899	0.714642	E001		0.317315	E008		0.876128	E001	0.11768	0.34408
ENSMUSG00000009907	20479	Vps4b	8030489C12Rik, Skd1	protein_coding	E002	-0.134486	0.155709	E005	0.0636607	0.940933	E004	0.0779445	0.850414	E002	-0.0697564	0.840482
ENSMUSG00000009927	75617; 243302; 629595	Rps25	2810009D21Rik	protein_coding	E001	-0.0291373	0.845673	E003	0.0305133	0.931844	E004	-0.103014	0.952017	E001	-0.0242331	0.947013
ENSMUSG00000009941	83454	Nxf2	4930455N06Rik, Nxf-b	protein_coding
ENSMUSG00000009995	66826	Taz	5031411C02Rik, 9130012G04Rik, AW107266, AW552613, G4.5	protein_coding	E022	0.391548	0.00457655	E027	0.335265	0.463853	E022	0.288956	0.266343	E007	-0.417135	0.655666	0.02	0.12	-0.01	0.09	-0.01	0.07	0	0.08	-0.01	0.05	-0.02	0.08	0.02	0.12	0	0	-0.13	0.58	0.28	1.13	-0.07	0.29			0.22	1.47	-0.07	3.19	0.12	0.52	0.09	0.41	0
ENSMUSG00000010021	286942	Kif19a	Kif19	protein_coding	E010		0.532934
ENSMUSG00000010025	11671	Aldh3a2	Ahd-3, Ahd-3r, Ahd3, Ahd3-r, AI194803, Aldh4, Aldh4-r, FALDH	protein_coding	E017	0.193199	0.0591393	E017	0.203955	0.336823	E017	0.136735	0.685154	E017	0.145587	0.447072	0	0.03	0.01	0.06	0.01	0.03	0.01	0.04																									0
ENSMUSG00000010044	114602	Zmynd10	Blu	protein_coding
ENSMUSG00000010045	56395	Tmem115	C78915, Pl6, Pp6	protein_coding	E001	0.0361418	0.790063	E001	-0.014429	0.996426	E001		0.999975	E001	-0.000751654	0.999937
ENSMUSG00000010047	15587	Hyal2	AI256841, AU020858, AW555733	protein_coding	E001		0.872388	E003		0.795927	E002		0.796498	E002		0.989093
ENSMUSG00000010048	15983	Ifrd2	1810034A24Rik, AA470234, AI838527, SKMc15	protein_coding	E010	-0.149194	0.739266	E001		0.285375	E008		0.871369	E007		0.958522
ENSMUSG00000010051	15586	Hyal1	Hya1, Hyal-1	protein_coding	ENSMUSG00000036091+ENSMUSG00000079334+ENSMUSG00000010051:E011	-1.25755	0.259041	ENSMUSG00000036091+ENSMUSG00000079334+ENSMUSG00000010051:E022		0.526043	ENSMUSG00000036091+ENSMUSG00000079334+ENSMUSG00000010051:E021		0.832615	ENSMUSG00000036091+ENSMUSG00000079334+ENSMUSG00000010051:E022		0.514064							0.36	1.53			0.29	4.09	0.37	29.02	0.32	7.92
ENSMUSG00000010054	80385	Tusc2	1190001E22Rik, AA407686, Fus1, Lgcc, PAP, Pdap2	protein_coding	E003		0.916962	E003		0.940271	E003		0.999975	E003		0.996284
ENSMUSG00000010057	56032	Nprl2	2810446G01Rik, G21, NPR2L, Tusc4	protein_coding	E010	0.0632808	0.943847	E011		0.389206	E007		0.77571	E001	-0.294188	0.532005
ENSMUSG00000010064	76257	Slc38a3	0610012J02Rik, D9Ucla2, mNAT, Nat1, Slc38-3, Sn1, Snat3	protein_coding
ENSMUSG00000010066	56808	Cacna2d2	a2d2, Cacna2d, du, mKIAA0558, td, torpid	protein_coding
ENSMUSG00000010067	56289	Rassf1	123F2, AA536941, AU044980, NORE2A, Rassf1A, Rassf1B, Rassf1C, RDA32, REH3P21	protein_coding	E017	-1.76667	0.000638691	E017		0.526043	E015		0.731918	E010	0.343979	0.750116																																	0.09
ENSMUSG00000010080	71889	Epn3	2310022G12Rik	protein_coding
ENSMUSG00000010086	22671	Rnf112	AI854096, bfp, R75574, Zfp179, ZNF179	protein_coding
ENSMUSG00000010095	17254	Slc3a2	4F2, 4F2HC, AI314110, Cd98, Ly-10, Ly-m10, Ly10, Mdu1, Mgp-2hc, NACAE	protein_coding	E011	0.19667	0.885518	E010	-0.0340881	0.999564	E001	0.0236871	0.970653	E001	-0.0193919	0.917338	0	0	0.01	0	0.01	0	0	0
ENSMUSG00000010097	53319	Nxf1	Mex67, Mvb1, Tap	protein_coding	E011	-0.0793984	0.789511	E017	0.122196	0.71169	E016	0.131105	0.498889	E005	-0.15708	0.765335									0.02	0.06	0.01	0	0.02	0.06	0.03	0.49
ENSMUSG00000010110	56389	Stx5a	0610031F24Rik, D19Ertd627e, Stx5	protein_coding	E040	-0.711854	0.570488	E049	-0.241046	0.452683	E027	0.198758	0.535571	E052	-0.341127	0.404655	0	0	-0.01	0	0	0	0	0							-0.18	2.35													0.02	0.05	0.01	0.05
ENSMUSG00000010122	67473	Slc47a1	1300013J15Rik, AI036982, MATE1, mMATE1	protein_coding
ENSMUSG00000010136	100503311	1700027A23Rik	1700027A23Rik	protein_coding
ENSMUSG00000010142	57916	Tnfrsf13b	1200009E08Rik, Taci	protein_coding	E014		0.705339	E020		0.893291	E014		0.761023	E013		0.812498			0.08	0.22	0.04	0.1
ENSMUSG00000010154	234857	Spire2	BC026502, Spir-2, Spir2	protein_coding
ENSMUSG00000010175	19130	Prox1	A230003G05Rik	protein_coding	E006		0.639556	E004		0.904153	E001		0.924425	E006		0.953424
ENSMUSG00000010205	71766	Raver1	1300006N24Rik, AA050359, mKIAA1978	protein_coding	E008	0.122601	0.389207	E009	0.165112	0.349848	E008	0.168533	0.542621	E009	0.166206	0.619149
ENSMUSG00000010277	72503	2610507B11Rik	AU022687, D11Bhm178e, D11Bhm179e, E1, mKIAA0100	protein_coding	E037	0.0964349	0.434864	E002	0.390046	0.841008	E016	-0.121901	0.690584	E039	-0.0776432	0.816684									-0.05	6.11	-0.06	2	-0.04	0.77	-0.08	366.51
ENSMUSG00000010290	98404	AI597479		protein_coding	E002		0.877812	E002		0.96083	E001		0.999975	E003		0.924181
ENSMUSG00000010307	67893	Tmem86a	1810054O13Rik, AI414959, AW742698	protein_coding	E001	-0.102548	0.575832	E001	-0.112588	0.88943	E001	-0.059364	0.877911	E001	-0.0572625	0.977734
ENSMUSG00000010311	269120	Optc		protein_coding
ENSMUSG00000010342	83560	Tex14	C85585	protein_coding	E017		0.351285
ENSMUSG00000010358	70110	Ifi35	2010008K16Rik, AW986054, ifi-35, IFP35	protein_coding	E011	-0.340005	0.109801	E009	0.477663	0.77626	E002		0.838136	E014	-0.197271	0.952727	0.01	0.04	0	0	0.01	0.04	0	0
ENSMUSG00000010362	66599	Rdm1	2410008M22Rik, AW212028, Rad52b	protein_coding	E008	0.292862	0.243844	E009		0.78429	E008		0.873699	E009	0.217063	0.675791
ENSMUSG00000010376	18002	Nedd8	Rub1	protein_coding	E002	0.0519586	0.876912	E008	-0.139322	0.767617	E002	0.0750611	0.779531	E008	-0.169878	0.572192
ENSMUSG00000010392	53334	Gosr1	AI414660, AI426320, BB145494, GOS-28, GOSRI, GS28	protein_coding	E009	0.196924	0.626174	E001	0.0458228	0.677711	E002		0.19153	E002	-0.1582	0.646456	0	0.03	0	0.02	0	0	0	0.03
ENSMUSG00000010406	68836	Mrpl52	1110047B07Rik	protein_coding	E001	0.0697774	0.886421	E003	-0.0270811	0.992346	E003		0.999975	E002	0.0635443	0.931919
ENSMUSG00000010435	78634	Spaca7	1700094C09Rik	protein_coding
ENSMUSG00000010453	226976	Kansl3	4632411B12Rik, 4932435K23, AI431067, AI647574, C85723, Kiaa1310, mKIAA1310	protein_coding	E002	0.130593	0.633755	E014	0.189235	0.829669	E004		0.853381	E020	0.160125	0.882284					0.11	0.58	0.22	28.84
ENSMUSG00000010461	14051	Eya4	B130023L16Rik	protein_coding
ENSMUSG00000010476	13593	Ebf3	3110018A08Rik, mKIAA4201, O/E-2	protein_coding
ENSMUSG00000010492		Gm16119		antisense	E007		0.827471	E014		0.999699
ENSMUSG00000010505	17932	Myt1	Nzf2, Nzf2a, Nzf2b, Nztf2	protein_coding
ENSMUSG00000010517	14084	Faf1	AA408698, Dffrx, Fam	protein_coding	E018	-0.228844	0.44215	E016	0.193374	0.448849	E002		0.898396	E002	-0.362072	0.44695
ENSMUSG00000010529	212539	Gm266		protein_coding
ENSMUSG00000010538	76927	Tsacc	1700021C14Rik, SIP	protein_coding	ENSMUSG00000001417+ENSMUSG00000010538:E018		0.967185	ENSMUSG00000001417+ENSMUSG00000010538:E016		0.995785
ENSMUSG00000010554	67493	Mettl16	2610100D03Rik, 2810013M15Rik, A830095F14Rik, AI846133, Mett10d	protein_coding	E003	-0.40247	0.219743	E008		0.83244	E011		0.773348	E021	0.193811	0.787693	0	0.1	0	0.11			0	0.09
ENSMUSG00000010592	13164	Dazl	Daz-like, Dazh, Dazl1, Dazla, Tpx-2, Tpx2	protein_coding	E001		0.967224
ENSMUSG00000010601	75761	Apol7a	9130022K13Rik, Apol3	protein_coding
ENSMUSG00000010607	66268	Pigyl	1810008A14Rik, PIG-Y, Pigy	protein_coding	E004		0.78565	E001		0.318196	E001		0.973563	E001		0.965837
ENSMUSG00000010608	67039	Rbm25	2600011C06Rik, 2610015J01Rik, A130095G20Rik, AI159652, AL023075, AU043498, RNPC7	protein_coding	E006	0.127099	0.296194	E016	0.0441369	0.898976	E003	0.0890291	0.895558	E019	-0.160104	0.669575
ENSMUSG00000010609	19165	Psen2	Ad4h, ALG-3, Alg3, PS-2, PS2, Psnl2, STM2	protein_coding	E031	-0.690079	0.438497	E016	-0.151912	0.819827	E022	-0.333348	0.922176	E011	0.0605403	0.835503
ENSMUSG00000010651	235674	Acaa1b		protein_coding	E004	-0.156376	0.579143	E011	0.0803705	0.839251	E004	-0.221262	0.862563	E011	0.0925057	0.597488
ENSMUSG00000010660	18799	Plcd1	AW212592, C79986	protein_coding	E002		0.588495	E006		0.397148	E013		0.779484	E004		0.253359
ENSMUSG00000010663	76267	Fads1	0710001O03Rik, A930006B21Rik, AI317215, DSD	protein_coding	E012	-0.0577157	0.580891	E003		0.797441	E010		0.761023	E010	-0.171396	0.909963
ENSMUSG00000010721	56873	Lmbr1	1110048D14Rik, AU017641	protein_coding	E008		0.788327	E012		0.696485	E012		0.784136	E012		0.840741			-0.31	2.74
ENSMUSG00000010751	79202	Tnfrsf22	2810028K06Rik, C130035G06Rik, mDcTrailr2, SOBa, Tnfrh2, Tnfrsf1al2	protein_coding	ENSMUSG00000090852+ENSMUSG00000010751:E002	0.171504	0.325269	ENSMUSG00000090852+ENSMUSG00000010751:E013		0.755773	ENSMUSG00000090852+ENSMUSG00000010751:E002		0.843613	ENSMUSG00000090852+ENSMUSG00000010751:E002		0.788081
ENSMUSG00000010755	27267	Cars	CA3	protein_coding	E012	0.148527	0.492328	E006	-0.251524	0.779762	E012		0.398293	E037	-0.466385	0.684557					0.12	0.45
ENSMUSG00000010760	22113	Phlda2	Ipl, Tssc3	protein_coding
ENSMUSG00000010796	74068	Asz1	4933400N19Rik, Gasz, ORF3	protein_coding
ENSMUSG00000010797	22413	Wnt2	2610510E18Rik, Int1l1, Irp, Mirp, Wnt-2, Wnt2a	protein_coding
ENSMUSG00000010803	14394	Gabra1	Gabra-1	protein_coding
ENSMUSG00000010825	170935	Grid2ip		protein_coding
ENSMUSG00000010830	105785	Kdelr3	AI173274	protein_coding	E005		0.922649
ENSMUSG00000010841	75437	1700006E09Rik		protein_coding	E002		0.957939
ENSMUSG00000010911	56369	Apip	APIP2, CGI-29, Mmrp19	protein_coding	E012	1.1263	0.466587	E003		0.753021	E005		0.851805	E008		0.883671	0	0.05	0.01	0.06	0.01	0.06	0.01	0.06
ENSMUSG00000010914	27402	Pdhx	AI481367, E3bp, Pdx1	protein_coding	E014	0.255348	0.831728	E010		0.958251	E009		0.963406	E009		0.947013							0	0.15
ENSMUSG00000010936	234729	Vac14	AA959718, BC032215, D8Wsu151e, ingls, Tax1bp2, Trx	protein_coding	E008	0.147951	0.142498	E007	0.202067	0.23351	E017	-0.094496	0.847923	E003	0.0909565	0.762027																											0	0.03
ENSMUSG00000011008	68279	Mcoln2	3300002C04Rik, AI549968, C86638, TRPML2	protein_coding	E019	-0.927046	0.282149	E009		0.903541	E014		0.545641	E014		0.937753
ENSMUSG00000011034	20537	Slc5a1	Sglt1	protein_coding
ENSMUSG00000011052		1700049J03Rik		antisense
ENSMUSG00000011096	67605	Akt1s1	1110012J22Rik, AI227026, Lobe, Lobel, PRAS40	protein_coding	ENSMUSG00000076051+ENSMUSG00000011096:E022	-0.700147	0.564152	ENSMUSG00000076051+ENSMUSG00000011096:E002	-0.255991	0.944619	ENSMUSG00000076051+ENSMUSG00000011096:E011		0.947008	ENSMUSG00000076051+ENSMUSG00000011096:E024	0.161241	0.623219
ENSMUSG00000011114	21376	Tbrg1	AA408552, AA409675, mFLJ00213, Niam, Tb-5	protein_coding	E009	0.452822	0.637851	E013	0.101364	0.818873	E013	0.112938	0.765914	E002	-0.0477931	0.900024
ENSMUSG00000011118	208098	Panx3	3230401P04, 4833413G11Rik	protein_coding	E001		1
ENSMUSG00000011148	11565	Adssl1	Adss, Adss1, AI528595	protein_coding	E004	0.478814	0.256798	E010		0.942134	E012		0.940361	E010		0.944774
ENSMUSG00000011154	75556	1700026D08Rik	AW047638, AW551802	protein_coding	E009		0.681345
ENSMUSG00000011158	72308	Brf1	2510002F24Rik, GTF3B, mTFIIIB90, TAF3C, TAFIII90, TFIIIB90	protein_coding	E017	-0.231353	0.676183	E012	0.206533	0.494216	E014		0.450587	E012	0.218196	0.412916
ENSMUSG00000011171	22355	Vipr2	Vip2, VPAC2, VPAC2R	protein_coding	E024		0.355718
ENSMUSG00000011179	18263	Odc1	ODC	protein_coding	E010	-0.136434	0.118094	E006	0.175007	0.286291	E001		0.42083	E009	-0.152297	0.693162
ENSMUSG00000011254	66628	Thg1l	1700121M19Rik, 5730409G07Rik, AA387658	protein_coding	E006		0.708521	E004		0.893291	E015		0.98376	E001		0.690291
ENSMUSG00000011256	11492	Adam19	AL024287, Mltnb, M[b]	protein_coding	E009		0.724165	E028		0.999699
ENSMUSG00000011257	230721	Pabpc4		protein_coding	E023	-0.302798	0.883743	E010	0.264114	0.88943	E008		0.910533	E010	0.204039	0.952474																									-0.03	0.09	-0.02	0.08	0	0.08	-0.01	0.09
ENSMUSG00000011263	74463	Exoc3l2	4933417E01Rik, AU042655	protein_coding
ENSMUSG00000011267	63872	Zfp296	2210018A16Rik	protein_coding	E003		0.808909	E002		0.999699	E003		0.99301	E001		0.999937
ENSMUSG00000011305	66968	Plin5	2310076L09Rik, AI415325, AW109675, Lsdp5, MLDP, PAT-1	protein_coding
ENSMUSG00000011306	70616	Sugp1	5730496N02Rik, Sf4	protein_coding	E004	-0.155234	0.407911	E004	-0.182234	0.381582	E004		0.751689	E004	-0.133005	0.732682
ENSMUSG00000011349	71241	Dmrtc2	4933432E21Rik, Dmrt7	protein_coding
ENSMUSG00000011350		Gm5893		processed_transcript
ENSMUSG00000011382	71755	Dhdh	1300018L09Rik, AA591799, Xld-1, Xld1	protein_coding	E002		0.839687	E001		0.999699	E001		0.999975	E001		0.999134
ENSMUSG00000011427	233056	Zfp790	6330581L23Rik	protein_coding	E005		0.893552	E006		0.655925	E001		0.991434	E006		0.811786
ENSMUSG00000011463	76703	Cpb1	0910001A18Rik, 1810063F02Rik, 2210008M23Rik, AI504870	protein_coding
ENSMUSG00000011486	103775	Slc25a41	4933406J04Rik, AI507137	protein_coding
ENSMUSG00000011589	240121	Fsd1		protein_coding
ENSMUSG00000011632	641361	Pinlyp	2310033E01Rik	protein_coding
ENSMUSG00000011658	70300	Fuz	2600013E07Rik, b2b1273Clo	protein_coding	E016	0.33255	0.59358	E044		0.631687	E044		0.558	E016	0.396169	0.639016	0.28	1.09	0.03	0.1	0.04	0.1	0.04	0.13			-0.19	3.17			-0.2	4.06									-0.12	0.36	0.02	0.1	0	0.04	0.01	0.06
ENSMUSG00000011751	80297	Spnb4	1700022P15Rik, 5830426A08Rik, dyn, lnd, nmf261, nmf379, qv, ROSA62, SpbIV, Spnb4	protein_coding	ENSMUSG00000092367+ENSMUSG00000011751+ENSMUSG00000089832:E043	-0.959018	0.0264793	ENSMUSG00000092367+ENSMUSG00000011751+ENSMUSG00000089832:E043	-0.514798	0.622225	ENSMUSG00000092367+ENSMUSG00000011751+ENSMUSG00000089832:E004	0.140261	0.62646	ENSMUSG00000092367+ENSMUSG00000011751+ENSMUSG00000089832:E043	-0.457589	0.682127
ENSMUSG00000011752	18648	Pgam1	2310050F24Rik, Pgam-1	protein_coding	E002	-0.912286	0.126975	E002		0.832758	E001		0.754012	E001		0.999937
ENSMUSG00000011831	14020	Evi5	NB4S	protein_coding	E009	0.193204	0.471931	E037	-0.365145	0.793147	E009		0.778914	E031	0.344897	0.670611	0.02	0.09	0	0.08	0	0.07	0	0.09
ENSMUSG00000011832	213027	Evi5l	1700084G18Rik, 2310039H16Rik, 3110007G05Rik, B130050I23Rik	protein_coding	E048	-7.06788	0.0122884	E026		0.574309	E006		0.400676	E006		0.44695			0.37	3.41	0.48	9.37	-0.05	0.17					-0.12	0.5	-0.05	0.34									0.08	0.35	0.05	0.31
ENSMUSG00000011837	102209	Snapc2	0610007H10Rik, AU015675	protein_coding	E002		0.768715	E003		0.999699	E001		0.515574	E001		0.444089
ENSMUSG00000011877	216963	Git1	Cat-1, p95Cat	protein_coding	E012	-1.04142	0.415425	E004	0.20932	0.766524	E031	-0.183903	0.549519	E028	0.104875	0.952727									-0.07	0.65	-0.04	0.18
ENSMUSG00000011884	56356	Gltp	1110001F24Rik, C76925, C77564	protein_coding	E007	0.0431899	0.769709	E003	-0.024573	0.599336	E003	-0.016037	0.83995	E011	0.221595	0.84866																									0	0	0	0	0	0	0	0
ENSMUSG00000011958	12175	Bnip2	5730523P12Rik, BNIP2beta, Nip21	protein_coding	E014	0.0702867	0.471552	E006	-0.133651	0.679936	E002	0.421207	0.816706	E013	0.0924013	0.611446			0.19	156.49
ENSMUSG00000011960	12455	Ccnt1	2810478G24Rik, AI115585, CycT1	protein_coding	E003	-0.105055	0.0143222	E007	0.167081	0.833493	E004		0.756843	E009	0.127222	0.913043
ENSMUSG00000012017	224024	Scarf2	AI194363, NSR1, Scarf1, Scatf1, SREC-II, Srec2, SrecII, SRECRP-1, W53987, W65560	protein_coding	E010		0.164559	E009		0.943192	E009		0.916794	E009		0.784537
ENSMUSG00000012042	67741	4930579F01Rik		protein_coding
ENSMUSG00000012076	52592	Brms1l	0710008O11Rik, AI159718, BRMS1, D12Ertd407e	protein_coding	E009		0.45104	E005		0.935412	E010		0.890765	E009		0.947013	0.01	0.13	0.05	0.18	0.01	0.11	0.05	0.21
ENSMUSG00000012114	94112	Med15	A230074L19Rik, AW536074, Pcqap	protein_coding	E014	0.14482	0.25148	E004	0.0795124	0.892599	E017	-0.106179	0.680824	E014	0.134758	0.433844	-0.13	21.52							0.04	0.28	0.01	0.31			0.17	0.68											0.04	0.24
ENSMUSG00000012117	67422	Dhdds	3222401G21Rik, CIT, DS, HDS, W91638	protein_coding	E005	-0.113451	0.165703	E004	-0.189047	0.878707	E027	0.147686	0.823019	E016	0.192586	0.305838	0	0.03	0	0.03	0.03	0.14	0.04	0.18											0.09	0.94	0.04	0.2	0.14	13.22
ENSMUSG00000012123	230806	Aim1l		protein_coding	E035		0.934066
ENSMUSG00000012126	67586	Ubxn11	4930506L07Rik, D4Bwg1540e, Soc, Soci, Ubxd5	protein_coding	E017		0.571991																																				0.03	0.69	-0.05	0.82
ENSMUSG00000012187	68393	Mogat1	0610030A14Rik, 1110064N14Rik, Dgat2l, Dgat2l1, mDC2, MGAT1	protein_coding
ENSMUSG00000012211	75671	Tex22	1700028O09Rik, AV210422, Tep22	protein_coding
ENSMUSG00000012282	20890	Wnt8a	Stra11, Wnt-8A, Wnt-8D, Wnt8d	protein_coding
ENSMUSG00000012296	74094	Tjap1	0610041D19Rik, AI415281, AW121008, Pilt, Tjp4	protein_coding	E008	-0.343416	0.727456	E001		0.925602	E009		0.8561	E009	-0.222182	0.739479	0.03	0.1	0.15	1.49	0.06	0.23	0.01	0.05
ENSMUSG00000012350	13661	Ehf	9030625L19Rik, AU019492	protein_coding
ENSMUSG00000012396	71950	Nanog	2410002E02Rik, ecat4, ENK	protein_coding
ENSMUSG00000012405	66480; 100043670; 100043805	Rpl15	2510008H07Rik	protein_coding	E001	-0.214747	0.0735273	E002		0.963501	E002		0.655188	E001		0.579011
ENSMUSG00000012422	66074	Tmem167	0610041E09Rik, 5730424F14Rik, AU041184, AW537806, ENSMUSG00000060669, Gm10085, Tmem167a	protein_coding	E005	0.121134	0.326653	E005	0.0972323	0.899934	E002		0.994557	E007	-0.0367659	0.989093
ENSMUSG00000012428	117167	Steap4	1110021O17Rik, AI481214, Tiarp, Tnfaip9	protein_coding	E002		0.280471
ENSMUSG00000012429	66308	2810021B07Rik	2810021B07Rik, C330007M08Rik, Ttdn1	protein_coding	E002		0.532087	E002		0.997106	E002		0.91566	E002		0.999937
ENSMUSG00000012443	16551	Kif11	Eg5, Kif8, Kifl1, Knsl1	protein_coding	E017	0.216214	0.576849	E004	-0.630291	0.622225	E001		0.809032	E022	0.0988867	0.785602
ENSMUSG00000012483	68240	Rpa3	14kDa, C330026P08Rik	protein_coding	E003		0.808058	E001		0.849762	E005		0.809032	E001		0.959855
ENSMUSG00000012519	74568	Mlkl	9130019I15Rik	protein_coding	E003	0.110961	0.855316	E014		0.955195	E017		0.734203	E013		0.966364
ENSMUSG00000012520	18935	Phox2b	Dilp1, NBPhox, Pmx2b	protein_coding
ENSMUSG00000012535	320938	Tnpo3	5730544L10Rik, C430013M08Rik, C81142, D6Ertd313e, mKIAA4133, Trn-SR	protein_coding	E006	0.203	0.0783406	E040	-0.266197	0.344384	E006	0.201105	0.281736	E026	-0.236022	0.663807
ENSMUSG00000012609	320244	Ttll5	1700048H13Rik, 2310009M18Rik, 4930556H18Rik, AI428864, D630041K24Rik, mKIAA0998, R75373, Stamp	protein_coding	E045	0.619141	0.379479	E038		0.0563144	E044		0.238136	E044	0.720462	0.187367	0.01	0.35			0.07	0.7	0.45	43.97																			0.03	0.38	-0.04	0.26	-0.04	0.36
ENSMUSG00000012640	69930	Zfp715	2610041B18Rik, mszf15	protein_coding	E002	-0.259614	0.212836	E002	-0.143555	0.185661	E011		0.449778	E006	-0.202757	0.817611	-0.06	0.23																															-0.29
ENSMUSG00000012705	57264	Retn	ADSF, Fizz3, Rstn, Xcp4	protein_coding
ENSMUSG00000012777	100503991	Acpt	EG546967, Gm1432	protein_coding
ENSMUSG00000012819	22295	Cdh23	4930542A03Rik, ahl, ahl1, bob, bus, mdfw, nmf112, nmf181, nmf252, sals, USH1D, v	protein_coding	E048		0.987813
ENSMUSG00000012848	20103	Rps5	AA617411	protein_coding	E013	0.186023	0.360515	E005	-0.459189	0.192427	E004	0.0715506	0.44934	E013	0.220443	0.566149
ENSMUSG00000012889	244550	Podnl1	5832418A03Rik, Gm506	protein_coding
ENSMUSG00000013033	330814	Lphn1	2900070I05Rik, AI182398, CLIBA, Lec2, mKIAA0821	protein_coding
ENSMUSG00000013076	75723	Amotl1	2310010G08Rik, 2310067L22Rik, 4932416D09Rik, JEAP, mFLJ00155	protein_coding	E004		0.577972	E001		0.993654	E001		0.782973	E001		0.811564
ENSMUSG00000013083	69147	2200002J24Rik		protein_coding
ENSMUSG00000013089	104156	Etv5	1110005E01Rik, 8430401F14Rik, ERM	protein_coding	E002		0.138691	E002		1	E002		0.948623	E002		0.999937
ENSMUSG00000013091	78052	Tmem190	4930572D21Rik	protein_coding	E003		0.477418
ENSMUSG00000013150	70575	Gfod2	5730466C23Rik	protein_coding	E002		0.491976	E001		0.999699	E001		0.999975
ENSMUSG00000013155	102124	Enkd1	AI606951, E130303B06Rik	protein_coding	E002		0.87322	E004		0.312626	E002		0.969804	E004		0.793026
ENSMUSG00000013158	71046	4933405L10Rik		protein_coding
ENSMUSG00000013160	11972	Atp6v0d1	Ac39, AI267038, Atp6d, P39, VATX, Vma6	protein_coding	E008	0.0208985	0.617217	E007	0.0319117	0.771154	E007	0.0219045	0.983042	E006	0.266879	0.944758
ENSMUSG00000013236	19280	Ptprs	AL022616, PTP, PTP-NU3, PTPNU-3, PTPsigma, Ptpt9, R-PTP-S, RPTPsigma	protein_coding	E018	-0.182915	0.526977	E018	-0.202584	0.597746	E021		0.400676	E018	-0.222851	0.493218	-0.01	0.11	0.01	0.11			-0.02	0.08
ENSMUSG00000013275	98396	Slc41a1	AI573938, B230315F01Rik	protein_coding	E013	0.131749	0.704417	E006	-0.122114	0.913474	E006		0.922103	E015	-0.0623457	0.407256
ENSMUSG00000013338	74562	Fer1l4	9130402C12Rik	protein_coding
ENSMUSG00000013353	74054	4931406B18Rik	4930538L19Rik	protein_coding
ENSMUSG00000013367	210094	Iglon5	A230106M20Rik, Gm1431	protein_coding	E001		0.897626
ENSMUSG00000013415	140486	Igf2bp1	AL024068, AW549074, CRD-BP, Crdbp, D030026A21Rik, D11Moh40e, D11Moh45, IMP-1, Neilsen, Zbp1	protein_coding	ENSMUSG00000013415+ENSMUSG00000093358:E011		0.999595
ENSMUSG00000013418	14422	B4galnt2	AI593864, Dlb-1, Dlb1, Galg2, Galgt2, Ggm3, Igf2bp1	protein_coding	E001		0.885115	E002		0.913537	E001		0.999975	E002		0.999937
ENSMUSG00000013419	270210	Zfp651	4732420M22Rik, BC030045, R74626	protein_coding	E006		0.561629	E006		0.999699
ENSMUSG00000013465	58202	Cobra1	A730008L03Rik, AB041607, AI663983, Cobra1, Nelf-b	protein_coding	E019	-0.114633	0.707889	E019	-0.174046	0.715109	E016	-0.109974	0.828385	E023	-0.12727	0.861482	0	0	0	0	0	0	0	0																									0
ENSMUSG00000013483	170720	Card14	Bimp2, CARMA2	protein_coding
ENSMUSG00000013495	72392	Tmem175	3010001K23Rik, AI504381	protein_coding	E003	1.10172	0.0652011	E006		0.87113	E002		0.816706	E002	-0.221628	0.948629																									-0.25	46.01	-0.31	1180.21	-0.33	3679.74			-0.17
ENSMUSG00000013523	76960	Bcas1	2210416M21Rik, 9030223A09Rik, AI841227, NABC1	protein_coding	E006		0.918464	E004		0.849762	E005		0.98854	E007		0.998197
ENSMUSG00000013539	27883	D16H22S680E	D16H22S680E, T10	protein_coding	E020	-0.499362	0.0897351	E020	-0.231456	0.842934	E020		0.905943	E020	-0.64638	0.0651257
ENSMUSG00000013562		4833413E03Rik		protein_coding
ENSMUSG00000013584	19378	Aldh1a2	Aldh1a7, AV116159, Raldh1, Raldh2	protein_coding	E011		0.827264	E014		1
ENSMUSG00000013593	226646	Ndufs2	AL033311	protein_coding	E010	-0.396911	0.391369	E005	-0.022411	0.980903	E001	0.0734044	0.909153	E002	0.12588	0.498497	0	0	0	0	0	0	0.01	0	0.1	361.9	0.26	2.17
ENSMUSG00000013611	66696	Snx31	4631426E05Rik	protein_coding
ENSMUSG00000013622	381629	Atraid	0610007C21Rik, AI316792, Apr3, HSPC013, p18	protein_coding	E012	-0.421721	0.564857	E014	-0.451935	0.891023	E023	0.103579	0.592989	E009	-0.354722	0.760781	0.01	0.03	0	0	0	0	0	0																	0	0.02	0	0.03	0	0.04	0	0.03
ENSMUSG00000013629	69719	Cad	2410008J01Rik, AU018859, Cpad	protein_coding	E006	0.233143	0.399353	E006	0.336334	0.305673	E030	0.169201	0.788653	E050	-0.252108	0.573925	0	0.04			-0.01	0.06	0.01	0.05
ENSMUSG00000013643	70163	Lypd8	2210415F13Rik	protein_coding
ENSMUSG00000013646	79566	Sh3bp5l	2310074E09Rik, BC003251, mKIAA1720	protein_coding	E005	-0.386098	0.33801	E005		0.83319	E005		0.877962	E018	0.137735	0.795892
ENSMUSG00000013653	69864	1810065E05Rik	AV047390	protein_coding
ENSMUSG00000013662	67979	Atad1	4921525H23Rik, AW107648, Thorase	protein_coding	E005	-0.0937453	0.89148	E001	-0.0247521	0.977849	E007		0.751038	E007	0.0906734	0.899378
ENSMUSG00000013663	19211	Pten	2310035O07Rik, A130070J02Rik, AI463227, B430203M17Rik, MMAC1, TEP1	protein_coding	E004	-0.295449	0.206293	E011	0.0835605	0.772358	E004	-0.186754	0.637286	E012	0.148862	0.575901
ENSMUSG00000013668	233918	4933402N03Rik	4930412O05	protein_coding
ENSMUSG00000013698	18611	Pea15a	Mat1, PEA-15, Pea15, Pkcs15	protein_coding	E012	0.155787	0.630394	E005	0.280495	0.810868	E005	0.278908	0.902749	E007	-0.25384	0.968432																															-0.01	0.07
ENSMUSG00000013701	53600	Timm23	Tim23	protein_coding	ENSMUSG00000077611+ENSMUSG00000013701:E014	-0.469256	0.863348	ENSMUSG00000077611+ENSMUSG00000013701:E017		0.990915	ENSMUSG00000077611+ENSMUSG00000013701:E020		0.989414	ENSMUSG00000077611+ENSMUSG00000013701:E021		0.920902
ENSMUSG00000013707	69769	Tnfaip8l2	1810019A08Rik, AW610835, TIPE2	protein_coding	E001	0.00953484	0.957076	E001	0.0121156	0.988631	E001	0.0274506	0.940298	E001	0.00653652	0.999937
ENSMUSG00000013736	70047	Trnt1	2410043H24Rik, 2610044E04Rik, 9830143O18Rik, AA408384, C76540, CGI-47, mt-Trat	protein_coding	E021	-0.379574	0.289647	E012		0.954158	E013		0.949623	E021		0.908457
ENSMUSG00000013766	70274	Ly6g6e	2310011I02Rik, G6e	protein_coding
ENSMUSG00000013787	110147	Ehmt2	Bat8, D17Ertd710e, G9a, KMT1C, NG36	protein_coding	E042	0.154738	0.119673	E009	0.407221	0.679917	E044	-0.163514	0.618248	E042	0.224417	0.0706084	-0.05	0.14	-0.05	0.2	-0.01	0	-0.01	0	0.06	0.36																							-0.08
ENSMUSG00000013822	66126	Elof1	1110011K10Rik	protein_coding	E002	0.0287165	0.847126	E005		0.956601	E002		0.945634	E002		0.952089
ENSMUSG00000013833	216154	Med16	95kDa, A630083L04, Thrap5, Trap95	protein_coding	E013	-0.16786	0.527273	E005	0.225875	0.5957	E015		0.612184	E015	0.191142	0.817293
ENSMUSG00000013846	20442	St3gal1	5330418N22Rik, AI467004, Siat4, Siat4a, St3gal-1, ST3GalI	protein_coding	E003	0.142767	0.558831	E001	-0.0119467	0.829669	E004	0.154936	0.819691	E003	0.184541	0.573925
ENSMUSG00000013858	216157	ORF61	AC087114.7gm12, AC087114.7gm2, mFLJ00277, ORF61, R32184_3	protein_coding	E006	-0.347032	0.123499	E015	0.0988515	0.493395	E018	-0.119027	0.7892	E006	-0.20467	0.79916
ENSMUSG00000013878	77733	Rnf170	6720407G21Rik, AI481227	protein_coding	E023		0.545612	E013		0.42623	E005		0.813672	E013		0.911502							0.01	0.1
ENSMUSG00000013921	76686	Clip3	1500005P14Rik, AI844915, Clipr-59	protein_coding
ENSMUSG00000013928		Thap8		protein_coding
ENSMUSG00000013936	17906	Myl2	MLC-2, MLC-2v, Mlc2v, Mylpc	protein_coding
ENSMUSG00000013973	21945	Dedd	CASP8IP1, Dedpro1, DEFT, FLDED1, KE05	protein_coding	E011		0.141121	E011		0.99465	E011		0.779203	E011		0.991369					0.24	1.1	0.21	1.47
ENSMUSG00000013974	69189	1810033B17Rik	Mcemp1	protein_coding	E003	0.0304346	0.739254	E001	-0.0961865	0.815975	E006	-0.0149447	0.998649	E003	0.0387893	0.819263
ENSMUSG00000013997	27045	Nit1	AI255805, ESTM30, W57327	protein_coding	E015	-0.117747	0.727532	E012	0.0746539	0.989644	E006		0.91535	E018	-0.389253	0.915709	-0.02	0.07	-0.02	0.07							0.05	0.27
ENSMUSG00000014030	18507	Pax5	BSAP, EBB-1, KLP, Pax-5	protein_coding
ENSMUSG00000014039	114604	Prdm15	C21orf83, E130018M06Rik, ORF62, Zfp298	protein_coding	E029	0.559783	0.406224	E029		0.589024	E004		0.832615	E004		0.683052			-0.28	1.37			-0.3	1.39
ENSMUSG00000014074	70238	Rnf168	3110001H15Rik	protein_coding	E007	0.434392	0.221512	E009		0.538139	E009		0.295862	E009	-0.128158	0.0907214
ENSMUSG00000014075	66061	Tctex1d2	0610012D17Rik, 2410011K15Rik	protein_coding	E006		0.254749	E002		0.706457	E005		0.999975	E006		0.968336	-0.06	0.22			-0.06	0.27			0.34	77.66			0.22	3.27	0.16	0.88
ENSMUSG00000014077	56398; 100504089	1500003O03Rik	1500003O03Rik, AA960066, AI046351, Cahp, Chp, p24, Sid470p	protein_coding	E014	-0.0144575	0.480698	E007	-0.105822	0.933255	E012	0.218039	0.985878	E014	-0.00987876	0.762494
ENSMUSG00000014104	84543	Sval2	SLP-M	protein_coding
ENSMUSG00000014158	63873	Trpv4	0610033B08Rik, OTRPC4, Trp12, VR-OAC, VRL-2, VROAC	protein_coding	E011		0.679429	E021		0.876403	E014		0.849192	E021		0.947013			0.06	0.44	-0.04	0.38																											-0.21
ENSMUSG00000014164	100503085	Klhl3	7530408C15Rik, AI430941, EG627648	protein_coding	E006		0.579041	E004		0.998489	E001		0.918406	E002		0.993902
ENSMUSG00000014177	67510	Fam18b	1810036I24Rik, Fam18b, Fam18b1	protein_coding	E011	0.0573597	0.938986	E012		0.940271	E012		0.6411	E010	0.0995673	0.93724
ENSMUSG00000014195	56354	Dnajc7	2010003F24Rik, 2010004G07Rik, CCRP, mDj11, mTpr2, Ttc2	protein_coding	E010	-0.454652	0.243311	E022	0.191437	0.757506	E008	-0.103223	0.814401	E004	0.0963032	0.443222	0	0	0	0	0	0	0.01	0
ENSMUSG00000014198	278304	Zfp385c	A930006D11Rik, Znf385c	protein_coding	E001		0.955064
ENSMUSG00000014226	12301	Cacybp	SIP	protein_coding	E001	-0.0998296	0.436209	E005	0.0284279	0.965246	E003		0.865205	E005	0.0678971	0.813145
ENSMUSG00000014232	76779	Cluap1	2310030D15Rik, 2610111M03Rik	protein_coding	ENSMUSG00000014232+ENSMUSG00000005982+ENSMUSG00000093575:E048	-0.442488	0.498389	ENSMUSG00000014232+ENSMUSG00000005982+ENSMUSG00000093575:E049	-0.262893	0.829998	ENSMUSG00000014232+ENSMUSG00000005982+ENSMUSG00000093575:E027	-0.0872653	0.479818	ENSMUSG00000014232+ENSMUSG00000005982+ENSMUSG00000093575:E040	-0.399463	0.617217	-0.27	5.69
ENSMUSG00000014243	69747	Zswim7	2410012H22Rik	protein_coding	E001		0.880318	E003		0.955195	E001		0.983159	E002		0.830355
ENSMUSG00000014245	327942	Pigl	Gm737	protein_coding	E009		0.652782	E009		0.841493	E002		0.994382	E009		0.497387	0.24	1.03					0.38	1.54																	0.12	0.42			0.04	0.18	0.03	0.23
ENSMUSG00000014294	17991	Ndufa2	AV000592, B8, C1-B8, CI-B8	protein_coding	E003	-0.044139	0.903718	E003	-0.056874	0.964539	E002		0.999975	E003	-0.0696246	0.953265
ENSMUSG00000014301	66449	Pam16	2010110I09Rik, AV006767, CGI-136, Magmas, Tim16, Timm16	protein_coding	E001		0.495272
ENSMUSG00000014303	83396	Glis2	Gli5, Klf16, Nkl	protein_coding	E018		0.957458
ENSMUSG00000014313	12864	Cox6c		protein_coding	E010	-0.218125	0.449513	E004	-0.0466684	0.990009	E007	-0.0189269	0.937102	E004	-0.0736278	0.947681
ENSMUSG00000014329	83675	Bicc1	Bic-C, bpk, jcpk	protein_coding
ENSMUSG00000014349	268470	Ube2z	AW049199, C030047H17Rik, D11Moh35	protein_coding	E005	-0.0637747	0.633021	E005	-0.0403885	0.959416	E005	-0.0521803	0.892552	E004	-0.0416608	0.957482
ENSMUSG00000014351	14607	Gip		protein_coding
ENSMUSG00000014353	72477	Tmem87b	2610301K12Rik, 2810431I02Rik, AU014804	protein_coding	E015	-1.93839	0.197848	E008	0.265591	0.218414	E026	-0.371881	0.212341	E026	-0.204315	0.736414													0.19	22.32	0.1	1.06
ENSMUSG00000014355	17222	Anapc1	2610021O03Rik, AI047775, AI853536, Apc1, AW547281, Mcpr, tsg24	protein_coding	E037	0.234405	0.190425	E054	0.154722	0.844287	E009	-0.311649	0.512709	E045	-0.226733	0.509343	0.06	0.53	-0.01	0.06	0.02	0.11	0.03	0.15
ENSMUSG00000014361	17289	Mertk	Eyk, Mer, nmf12, Nyk	protein_coding	E009	-0.570266	0.27169	E009	0.263107	0.873393	E013	-0.0400014	0.958296	E002	-0.0199892	0.920581
ENSMUSG00000014402	22088	Tsg101	AI255943, CC2	protein_coding	E018	0.86436	0.224228	E004	-0.0943408	0.652792	E011		0.849024	E017	0.119435	0.784197	0	0.03	0	0	0	0.03	0	0
ENSMUSG00000014418	246694	Hps5	AI646796, AL022647, C85120, haze, hz, maroon, mr, ru-2, ru2	protein_coding	E005	0.355764	0.326136	E005	0.342899	0.5957	E005	0.377156	0.422635	E041	0.278345	0.46318	0	0.03	-0.23	19.29	0	0.12	-0.01	0.05			-0.2	7.78																	-0.03	0.13
ENSMUSG00000014426	26407	Map3k4	D17Rp17, D17Rp17e, MAPKKK4, Mek4b, MEKK 4, Mekk4, mKIAA0213, MTK1, RP17, Rp17a, Tas	protein_coding	E026		0.855764	E025		0.99535	E002		0.976205	E027		0.952474
ENSMUSG00000014444	234839	Fam38a	9630020g22, Fam38a, mKIAA0233	protein_coding	E024	-0.176831	0.548422	E031	-0.107925	0.575069	E036	0.114018	0.604416	E036	0.104584	0.732543
ENSMUSG00000014453	12143	Blk		protein_coding
ENSMUSG00000014470	68718	Rnf166	1110031E24Rik, AW555115, Zfp313l	protein_coding	E003	0.0932299	0.454886	E003	0.0837131	0.734734	E001	0.029848	0.97862	E004	-0.0448592	0.986516
ENSMUSG00000014496	105522	Ankrd28	AI465466, AI604979, E430019N21Rik, mKIAA0379	protein_coding	E009		0.475017	E019		0.889583	E011		0.984323	E011		0.514064
ENSMUSG00000014498	237615	Ankrd52	6430544C07, G431002C21Rik	protein_coding	E017	-0.302765	0.0287018	E032	-0.0674535	0.374212	E012	-0.162001	0.714528	E032	-0.0595891	0.48485
ENSMUSG00000014503	53871	Pkd2l2	TRPP5	protein_coding	E016		0.717386	E015		0.99744	E015		0.999975	E015		0.999937			0.1	1.49			0.2	1.2
ENSMUSG00000014504	66384	Srp19	2310020D23Rik	protein_coding	E007	-0.582732	0.0296602	E014	-0.365408	0.83941	E005		0.399497	E009	0.457897	0.550562	0.1	0.73	0.03	0.21	0.02	0.07	-0.01	0.04	0.18	21.01															0.08	0.92	0.05	0.28	0.08	0.98			0.11
ENSMUSG00000014529	75010	4930511M11Rik	4930403J02Rik, 4930500J03Rik	protein_coding
ENSMUSG00000014542	51811	Clec4f	Clecsf13, D18063, Kclr, KUCR_MOUSE	protein_coding
ENSMUSG00000014543	170733	Klra17	Ly49q, Ly49q1	protein_coding	E002		0.646268
ENSMUSG00000014547	268752	Wdfy2	5830485M08, B130024L21Rik, ProF, ZFYVE22	protein_coding	E005	-0.22331	0.114941	E002	-0.151622	0.916637	E004		0.825891	E011	0.117752	0.881021	0	0.03	-0.03	0.11	-0.02	0.09	0	0.03
ENSMUSG00000014550	78287	Zfyve20	5330426D11Rik	protein_coding	E013	-0.195924	0.535519	E016	0.253262	0.878707	E004		0.93517	E010	0.238036	0.881474
ENSMUSG00000014551	64658	Mrps25	2810429N01Rik, Rpms25	protein_coding	E002	0.10193	0.439724	E001		0.494216	E002		0.529932	E007	-0.0862134	0.958522
ENSMUSG00000014554	27369	Dguok	dGK, dGK1, dGK2, dGK3	protein_coding	E008	0.0891885	0.779025	E009	-0.452878	0.597746	E009		0.533622	E009	-0.293264	0.88747
ENSMUSG00000014592	100072	Camta1	1810059M14Rik, 2310058O09Rik, AI316882, AW987475, mKIAA0833	protein_coding	E048		0.69316	E047		0.990009	E047		0.849024	E044		0.996289			0.05	0.24			0.05	0.27
ENSMUSG00000014599	12977	Csf1	C87615, Csfm, MCSF, op	protein_coding	E011		0.416163	E001		0.8687	E001		0.999975	E001		0.907185
ENSMUSG00000014601	229707	Fam40a	6330569M22Rik, 6530401O14Rik, Fam40a	protein_coding	E009	-0.208351	0.55311	E014	-0.175885	0.874844	E019		0.468969	E019	0.330591	0.615408																									0.02	0.05
ENSMUSG00000014602	16560	Kif1a	ATSV, C630002N23Rik, Gm1626, Kns1	protein_coding	E004		0.497686	E001		0.819423	E001		0.976605	E001		0.981833
ENSMUSG00000014603	11694	Alx3		protein_coding
ENSMUSG00000014606	67863	Slc25a11	2310022P18Rik, 2oxoc	protein_coding	E013	-0.206399	0.78765	E012	-0.0732421	0.693633	E016	0.140061	0.390101	E009	-0.0571779	0.955644
ENSMUSG00000014609	11448	Chrne	AChrepsilon, Acre, nAChRE	protein_coding
ENSMUSG00000014633	66531	2310061C15Rik	1110046L09Rik, 2310061C15Rik, DC13	protein_coding	E003	0.27926	0.745639	E003		0.982125	E001		0.890328	E012		0.944732	0.03	0.11	0	0.04	0	0.05	0	0.04													-0.34	1.22
ENSMUSG00000014668	231600	Chfr	5730484M20Rik, C230082M18, RNF116	protein_coding	E003	-0.119864	0.763874	E015	-0.107175	0.958784	E019		0.55467	E015	-0.183019	0.788081	-0.01	0.05	-0.01	0.04	-0.01	0.04	-0.01	0.04															0.12	0.82
ENSMUSG00000014686	330483	Ceacam16	Gm769	protein_coding	E001		0.752645	E003		0.991504	E003		0.549496	E005		0.891952
ENSMUSG00000014704	15399	Hoxa2	AI324701, Hox-1.11, HOX1.11	protein_coding
ENSMUSG00000014725	13522	Adam28	C130072N01Rik, D430033C21Rik, Dtgn1, eMDCII, MDC-L, MDC-Lm, MDC-Ls, MDCL, TECADAM	protein_coding
ENSMUSG00000014747	75305	Ankrd53	4930564N15Rik	protein_coding
ENSMUSG00000014748	21766	Tex261	3110001O07Rik, AA409339, AI480706, AL033351, TEG-261	protein_coding	E001	-0.041138	0.342702	E006	0.388484	0.493395	E013	-0.141695	0.977446	E009	0.5322	0.856119
ENSMUSG00000014763	67544	Fam120b	4932442K08Rik, AW049283, AW413338, CCPG, mKIAA1838, Pgcc1	protein_coding	E008	-0.149109	0.536554	E006	-0.239379	0.893586	E008		0.835411	E007	-0.204289	0.351004
ENSMUSG00000014767	21374	Tbp	Gtf2d, GTF2D1, SCA17, TFIID	protein_coding	E030	-0.222105	0.566403	E023		0.831058	E026		0.682365	E013	0.187614	0.735605			-0.13	0.74	0.13	1.88	0.28	1.35
ENSMUSG00000014769	19170	Psmb1	AA409053, C81484, Lmpc5	protein_coding	E005	-0.0353967	0.799987	E005	-0.00595479	0.999699	E005	-0.0137883	0.999975	E004	0.0553981	0.963731
ENSMUSG00000014771	18567	Pdcd2	AI528543, Pcd2, RP-8	protein_coding
ENSMUSG00000014773	13388	Dll1	Delta1	protein_coding
ENSMUSG00000014776	78688	Nol3	ARC, B430311C09Rik, MYC, NOP, Nop30	protein_coding
ENSMUSG00000014778	234686	Fhod1	BC017144, FHOS, FHOS1	protein_coding	E023	0.179167	0.391835	E013	0.316567	0.269747	E006	-0.697322	0.585213	E009	-0.146518	0.692358
ENSMUSG00000014782	102075	Plekhg4	4931414L13Rik, AI448583, mFLJ00068	protein_coding	E034		0.98186
ENSMUSG00000014786	277973	Slc9a5	Gm696	protein_coding	E016		0.220622	E007		0.959625	E006		0.317551	E015		0.817011
ENSMUSG00000014791	234683	Elmo3	9930107J06, BC058752, CED-12, Ced12	protein_coding	E005		0.722533	E011		0.988026							-0.08	0.89	-0.15	0.87	-0.08	0.52	-0.11	1.1																									0.21
ENSMUSG00000014813	20855	Stc1	Stc	protein_coding
ENSMUSG00000014837	74356	4931428F04Rik	AI426165, Kiaa0895l	protein_coding	E004		0.818029	E006		0.999731											0.14	0.72	0.05	0.5																			-0.16	1.43	-0.14	2.4	0.01	1.13
ENSMUSG00000014846	67971	Tppp3	2700055K07Rik, Ceacam9, CGI-38, mmCGM8	protein_coding	E007	0.339073	0.759268	E005	0.0519516	0.67435	E003	-0.00871861	0.991949	E002	0.0408279	0.942366
ENSMUSG00000014850	17686	Msh3	D13Em1, Rep-3, Rep3	protein_coding	E012		0.477631	E007		0.853218	E001		0.929065	E022		0.824261	0.23	1.29																															-0.19
ENSMUSG00000014852	279028	Adamts13	Gm710, vWF-CP	protein_coding
ENSMUSG00000014856	66320	Tmem208	1700006C06Rik, 2610030K20Rik, Hspc171	protein_coding	E008	0.130557	0.285683	E014	-0.507439	0.634763	E003		0.757894	E008	0.129623	0.500221							0.07	34.48	0.17	20584.7					-0.13	6.99									0.19	132.7
ENSMUSG00000014859	104394	E2f4	2010111M04Rik, AI427446	protein_coding	E010	-0.0738133	0.773943	E008	0.0899116	0.978542	E007		0.905565	E007	0.0973212	0.933134
ENSMUSG00000014867	20932	Surf4	AL033340, AL033373, Surf-4	protein_coding	E006	0.0577385	0.525512	E007	0.0282181	0.989644	E002	-0.0276571	0.820905	E003	-0.0267645	0.955644					-0.02	0.07
ENSMUSG00000014873	20931	Surf2	Surf-2	protein_coding	E012	-0.910729	0.380034	E008	0.117003	0.795311	E010		0.922156	E015	0.190622	0.710331													-0.09	1.39																			0.33
ENSMUSG00000014905	27362	Dnajb9	AA408011, AA673251, AA673481, AW556981, ERdj4, Mdg1, mDj7	protein_coding	E002	0.0928269	0.00110236	E002	0.0921009	0.31708	E001		0.433616	E002	0.0724189	0.196016
ENSMUSG00000014907	234344	Naf1	Gm174	protein_coding	E001		0.398297	E001		0.680687	E004		0.568701	E001		0.654472
ENSMUSG00000014932	22612	Yes1	p61-Yes, Yes	protein_coding
ENSMUSG00000014956	19046	Ppp1cb	1200010B19	protein_coding	E013	-0.261942	3.25303e-05	E010	0.160069	0.197431	E005	-0.113937	0.22906	E010	0.169684	0.00447004
ENSMUSG00000014959	70231	Gorasp2	0610011A07Rik, 2410043M02Rik, 5730520M13Rik, 9430094F20Rik, AW552058, GOLPH2, GRASP55, GRS2, p59	protein_coding	E008	0.0568303	0.665816	E017	0.519881	0.76766	E016	0.0482294	0.892412	E011	-0.0770993	0.933134	-0.01	0	0	0	0	0	0	0
ENSMUSG00000014980	66637	Tsen15	5730449L18Rik, AL023077, Sen15	protein_coding	E015		0.670251	E003		0.706521	E006		0.674648	E006		0.55612			0.29	1.39	0.21	0.76	0.05	0.23
ENSMUSG00000015001	18256	Oc90	oc95, Ocn-95, PLA2L, Pla2ll	protein_coding
ENSMUSG00000015002	76740	Efr3a	A130089M23Rik, BB071175, C76891, C920006C10Rik, D030063F01Rik, mKIAA0143	protein_coding	E036	-0.240207	0.135763	E036	-0.167649	0.844825	E021	0.215769	0.491832	E036	-0.186779	0.597488							-0.01	0.04																					-0.13	2.89
ENSMUSG00000015013	59005	Trappc2l	1810017G16Rik, AB030200, Hspc176, Tca17	protein_coding	E001	-0.149018	0.30266	E005	0.191655	0.517786	E005		0.541197	E002	-0.0571312	0.572192
ENSMUSG00000015016	257633	Acsf3	BB101783	protein_coding	E008	0.108468	0.832569	E002		0.546042	E002		0.501045	E005		0.989745
ENSMUSG00000015023	13680	Ddx19a	DBP5, Ddx19, Eif4a-rs1	protein_coding	E003	0.165649	0.620475	E002	-0.115733	0.889068	E014		0.689507	E014	0.188866	0.669265
ENSMUSG00000015027	50917	Galns	mFLJ00319	protein_coding	E005	0.0536533	0.701855	E002	0.0507476	0.97084	E007	0.0868106	0.976247	E005	0.0557105	0.793984
ENSMUSG00000015053	14461	Gata2	Gata-2	protein_coding
ENSMUSG00000015083	69379	C8g		protein_coding	E012		0.77836	E019		0.999564	E019		0.999975	E019		0.93724
ENSMUSG00000015085	12496	Entpd2	Cd39l1, NTPDase2	protein_coding	ENSMUSG00000015094+ENSMUSG00000015085:E027		0.444641
ENSMUSG00000015087	227624	Rabl6	B230208H17Rik, parf, Rbel1, Rbel1a, Rbel1b	protein_coding	E018	-0.162335	0.776424	E032	0.145088	0.848711	E032	0.146956	0.815309	E010	0.0857914	0.947681																																	0.03
ENSMUSG00000015090	19215	Ptgds	21kDa, L-PGDS, PGD2, PGDS, PGDS2, Ptgs3	protein_coding
ENSMUSG00000015092	59022; 665181	Edf1	0610008L11Rik, AA409425	protein_coding	E006	0.0368605	0.861598	E008	-0.190894	0.897749	E013	0.0471386	0.785917	E006	0.0271666	0.991369
ENSMUSG00000015093	69454	Clic3	2300003G24Rik	protein_coding	E016		0.575832																						0.14	0.76	0.09	0.53
ENSMUSG00000015094	18146	Npdc1	AI314472, NPDC-1	protein_coding	ENSMUSG00000015094+ENSMUSG00000015085:E027		0.444641
ENSMUSG00000015095	30839	Fbxw5	AI159739, Fbw5	protein_coding	E012	0.138152	0.295109	E012	0.102105	0.802692	E012	0.178161	0.36867	E012	0.0897815	0.885391			0	0.04	-0.02	0.06																			0	0	0	0	-0.01	0	0	0	-0.01
ENSMUSG00000015112	50799	Slc25a13	AI785475, Ctrn	protein_coding	E014	0.233143	0.686057	E019		0.981723	E005		0.76135	E014		0.892875	-0.08	0.2	-0.02	0.23	0.02	0.11	-0.07	0.2																									0.26
ENSMUSG00000015120	22196; 100044900	Ube2i	5830467E05Rik, F830028O17Rik, UBC9, Ubce2i, Ubce9	protein_coding	E023	0.77948	0.1848	E007	0.678405	0.242486	E009		0.904762	E014	0.112191	0.958522
ENSMUSG00000015126	68327	0610007P22Rik	0610007P22Rik, 1110014B11Rik, AL022759	protein_coding	E003		0.600005	E006		0.896957	E002		0.959412	E004		0.854639
ENSMUSG00000015127	74154	Unkl	1300004G08Rik	protein_coding	E008		0.840581	E025		0.698987	E025		0.947632	E005		0.966364	-0.03	0.27	0.02	0.12	0.01	0.2
ENSMUSG00000015133	233328	Lrrk1	AW319595, C230002E15Rik, D130026O16Rik, mKIAA1790	protein_coding	E041	-0.251565	0.237454	E032	0.135565	0.569613	E041	-0.167183	0.731989	E041	-0.209572	0.572192	0.01	0.05
ENSMUSG00000015134	56847	Aldh1a3	ALDH6, RALDH3, V1	protein_coding
ENSMUSG00000015143	109711	Actn1	3110023F10Rik, Actn1a	protein_coding	E019	-0.0557004	0.585784	E019	-0.0719196	0.394684	E019	-0.0769115	0.526976	E015	0.0606731	0.460422																	0.01	0	0	0	0	0	0.01	0
ENSMUSG00000015149	64383	Sirt2	5730427M03Rik, Sir2l, SIR2L2	protein_coding	E004	-0.36982	0.361995	E025	0.0875294	0.54369	E003	0.0630038	0.902749	E018	-0.116853	0.811786											-0.05	0.45	-0.05	0.68
ENSMUSG00000015165	15388	Hnrnpl	C79783, D830027H13Rik, Hnrpl	protein_coding	E020	-0.258503	2.88431e-08	E003	0.505689	0.33241	E038	-0.560277	0.336619	E038	-0.384992	0.677977			0.15	15.77
ENSMUSG00000015176	70769	Nolc1	3230402K17Rik, AA408077, AA536818, AU046071, mKIAA0035, NOPP130, NOPP140, P130	protein_coding	E001	-0.218337	0.636662	E001	-0.258778	0.698987	E002		0.851577	E001	-0.176266	0.961106
ENSMUSG00000015189	213819	Casd1	Cas1, Cast1	protein_coding	E018	0.285622	0.280615	E010	0.289581	0.422967	E004		0.203171	E018	0.168609	0.814277			-0.04	0.35	0.02	0.16
ENSMUSG00000015202	215748	Cnksr3	6820402C05, BC024086, Magi1	protein_coding	E001	-0.105222	0.273603	E002	-0.182425	0.862629	E003		0.882944	E005	-0.189567	0.772864
ENSMUSG00000015214	53332	Mtmr1	AW049210	protein_coding	E029	-0.44605	0.0355317	E029	-0.241105	0.740085	E032		0.62646	E008	0.313517	0.516893	0.2	0.71			0.11	0.79																	0.07	0.23
ENSMUSG00000015217	15354	Hmgb3	Hmg2a, Hmg4	protein_coding	E014		0.708184
ENSMUSG00000015222	17756	Mtap2	MAP-2, Mtap-2, Mtap2	protein_coding
ENSMUSG00000015224	74519	Cyp2j9	8430417E17Rik	protein_coding
ENSMUSG00000015242	73398	Nipsnap3a	1700054F22Rik, AI429120	protein_coding
ENSMUSG00000015243	11303	Abca1	ABC-1, Abc1	protein_coding	E028	0.18698	0.0536793	E038	0.212404	0.339401	E038	0.194751	0.355928	E039	0.171525	0.291101
ENSMUSG00000015247	66536	Nipsnap3b	2700063N13Rik, Nipsnap3a	protein_coding	E010	-0.247415	0.668771	E010	-0.131095	0.973292	E010		0.946364	E005	0.0459418	0.993273	0	0	0.03	0.26
ENSMUSG00000015289	66192	Lage3	1110049G11Rik, Eso3, Itba2	protein_coding	E004		0.576849	E006		0.999699	E003		0.976247	E003		0.974266
ENSMUSG00000015290	27643	Ubl4	DXHXS254E, DXS254E, DXS254Eh, Gdx, Ubl4a	protein_coding	ENSMUSG00000015290+ENSMUSG00000032806:E003	-0.285558	0.556987	ENSMUSG00000015290+ENSMUSG00000032806:E021	0.0772061	0.722025	ENSMUSG00000015290+ENSMUSG00000032806:E003	-0.256146	0.819646	ENSMUSG00000015290+ENSMUSG00000032806:E021	0.0758428	0.473723	-0.01	0.03	0.01	0.03	0.01	0.03	0.01	0.03							-0.01	0.04
ENSMUSG00000015291	14567	Gdi1	GDIA, GDIalpha	protein_coding	E021	-0.206329	0.72186	E005	-0.134452	0.846554	E029	-0.0996529	0.693732	E032	-0.0678412	0.576245	0	0	0	0					0.04	0.21	-0.03	0.13	0.05	0.5	0.12	894.99																	0
ENSMUSG00000015305	70097	Sash1	1100001C18Rik, 2500002E12Rik, A330076K04Rik, mKIAA0790	protein_coding	E013		0.460948	E002		0.547617	E013		0.5468	E010	1.19082	0.727167
ENSMUSG00000015312	17873	Gadd45b	AI323528, Myd118	protein_coding	E004	-0.0819708	0.501143	E004		0.98713	E002		0.999975	E001		0.999937
ENSMUSG00000015314	30925	Slamf6	KAL1, KAL1b, Ly108, NTB-A, NTBA, SF2000	protein_coding	E008	-0.270162	0.0175939	E003		0.852648	E002		0.792316	E007	-0.0974181	0.976152
ENSMUSG00000015316	27218	Slamf1	4933415F16, AA177906, CD150, CDw150, ESTM51, IPO-3, Slam	protein_coding
ENSMUSG00000015335	66220	Zdhhc12	1190004A01Rik	protein_coding	E003	0.192174	0.20487	E007		0.570433	E003		0.793839	E007		0.936165
ENSMUSG00000015337	13804	Endog		protein_coding	E001		0.986978	E002		0.999699	E001		0.999975	E001		0.999937
ENSMUSG00000015340	13058	Cybb	C88302, Cgd, CGD91-phox, Cyd, gp91-1, gp91phox, Nox2	protein_coding	E001	-0.0440145	0.00269351	E011	0.020734	0.493395	E017	0.0255183	0.843055	E016	0.0266496	0.136116	0	0	0	0	0	0	0	0
ENSMUSG00000015341	57437	Golga7	AB041568, C130038N16Rik, GCP16, GOLGA3AP1, HSPC041, R75586	protein_coding	E001	-0.0718147	0.516337	E008	-0.19414	0.866506	E003	-0.0563472	0.999975	E004	0.259488	0.920521
ENSMUSG00000015342	22439	Xk	1810038K19Rik, Xkh, XRG1	protein_coding
ENSMUSG00000015354	76477	Pcolce2	2400001O18Rik, Pcpe2	protein_coding
ENSMUSG00000015355	12506	Cd48	AI449234, AW610730, Bcm-1, BCM1, BLAST, BLAST-1, BLAST1, MEM-102, Sgp-60, SLAMF2	protein_coding	E003	-0.030411	0.58481	E002	0.0128131	0.999699	E002	0.0386128	0.947647	E003	-0.0121842	0.999937					0	0	0	0
ENSMUSG00000015357	270166	Clpx	AU014732, E330029I21	protein_coding	E011	0.244279	0.29123	E003	0.21113	0.620937	E011		0.91476	E011	0.179859	0.824111					-0.19	1.29
ENSMUSG00000015363	67976	Trabd	5730502D15Rik, AL023039	protein_coding	E025	-0.0799459	0.720001	E025	-0.110379	0.753233	E017		0.766919	E019	0.197946	0.66595																													-0.11	0.62
ENSMUSG00000015365	83456	Mov10l1	CHAMP, Csm	protein_coding
ENSMUSG00000015377	69440	Fam116b	1700027J05Rik, AI414881, Fam116b	protein_coding	E014		0.484214	E005		0.982125	E011		0.999975	E001		0.999937
ENSMUSG00000015396	12522	Cd83		protein_coding	E003	0.0742061	0.856623	E003	0.0735958	0.963749	E003		0.87253	E005	-0.0315009	0.981833
ENSMUSG00000015401	57394	Tmem27	0610008J07Rik, NX-17, NX17	protein_coding
ENSMUSG00000015405	70008	Ace2	2010305L05Rik	protein_coding
ENSMUSG00000015437	14939	Gzmb	AI553453, CCP-1/C11, CCP1, Ctla-1, Ctla1, GZB	protein_coding
ENSMUSG00000015441	14943	Gzmf	CCP4, Ctla-7, Ctla7, MCSP-3	protein_coding
ENSMUSG00000015443	245839	Gzmn	GrN	protein_coding
ENSMUSG00000015451		C4a		processed_transcript	E030		0.354739
ENSMUSG00000015452	11596	Ager	RAGE	protein_coding	E003		0.536554
ENSMUSG00000015461	12915	Atf6b	AA617266, ATF6beta, Creb-rp, Crebl1	protein_coding	E020	0.0982405	0.51216	E023	0.162171	0.304416	E012	-0.137724	0.487992	E020	0.126199	0.447072	0.01	0	0	0	0.01	0	0	0																									0.01
ENSMUSG00000015467	81701	Egfl8	Ng3	protein_coding	ENSMUSG00000015474+ENSMUSG00000092176+ENSMUSG00000015467:E024	-0.620296	0.24338	ENSMUSG00000015474+ENSMUSG00000092176+ENSMUSG00000015467:E024	-0.507231	0.455209	ENSMUSG00000015474+ENSMUSG00000092176+ENSMUSG00000015467:E029	0.0830188	0.408068	ENSMUSG00000015474+ENSMUSG00000092176+ENSMUSG00000015467:E024	-0.392433	0.671273
ENSMUSG00000015468	18132	Notch4	Int-3, Int3, N4	protein_coding	E053		0.928231
ENSMUSG00000015474	54397	Ppt2	0610007M19Rik, AA672937	protein_coding	ENSMUSG00000015474+ENSMUSG00000092176+ENSMUSG00000015467:E024	-0.620296	0.24338	ENSMUSG00000015474+ENSMUSG00000092176+ENSMUSG00000015467:E024	-0.507231	0.455209	ENSMUSG00000015474+ENSMUSG00000092176+ENSMUSG00000015467:E029	0.0830188	0.408068	ENSMUSG00000015474+ENSMUSG00000092176+ENSMUSG00000015467:E024	-0.392433	0.671273			0	0			0.01	0
ENSMUSG00000015476	260297	Prrt1	Bat-4, Bat4, D17H6S54E, DSPD1, G5b, NG5, ORF31	protein_coding	E002		0.606242	E003		0.886454	E003		0.802646	E002		0.953424
ENSMUSG00000015478	54197	Rnf5	2410131O05Rik, AA407576, NG2	protein_coding	E012	-0.144279	0.554217	E007	-0.0771407	0.959134	E004		0.747481	E004	0.151859	0.735605
ENSMUSG00000015484	329274	Fam163a	A230106N23Rik	protein_coding
ENSMUSG00000015488	381356	Cacfd1	5930434B04Rik, mFwe	protein_coding	E019	-0.0971095	0.700106	E020		0.909259	E002		0.886662	E006	0.19243	0.942842			-0.42	1161.82			0.01	0.15
ENSMUSG00000015501	15273	Hivep2	MIBP1, Schnurri-2, Shn-2	protein_coding	E009		0.569931	E009		0.994097	E009		0.999975	E009		0.999937
ENSMUSG00000015519	67719	2310057J18Rik	2210414P04Rik	protein_coding
ENSMUSG00000015522	11863	Arnt	bHLHe2, D3Ertd557e, Drnt, ESTM42, Hif1b, mKIAA4051, W08714	protein_coding	E008	-0.192907	0.526244	E012	-0.263988	0.539943	E035	0.163576	0.527405	E014	-0.143836	0.606363	0	0	0.24	10.6	0.01	0.05	0	0																	0.01	0.11					-0.01	0.08
ENSMUSG00000015533	16398	Itga2	CD49B, DX5	protein_coding
ENSMUSG00000015536	17434	Mocs2	AI415403	protein_coding	E015	-0.666194	0.142399	E019	0.131321	0.980903	E015		0.743724	E011	0.101359	0.93028									0.08	0.64															0.03	0.13	0.01	0.04	0.01	0.05	0.02	0.06
ENSMUSG00000015542	66176	Nat9	1110028N05Rik	protein_coding	E020	1.47976	0.386123	E011		0.698461	E001		0.57035	E011		0.976232
ENSMUSG00000015568	16956	Lpl		protein_coding	E017	-0.0788626	1.97738e-05	E001	-0.484497	0.779762	E016	-0.069736	0.811825	E009	0.0100117	0.56171
ENSMUSG00000015575	11974	Atp6v0e	Atp6k, Atp6v0e1, M9.2	protein_coding	E005	-0.391422	0.205288	E006	-0.0180758	0.967873	E004	-0.0181511	0.973563	E006	-0.0367767	0.885391
ENSMUSG00000015579	18091	Nkx2-5	Csx, Nkx-2.5, Nkx2.5, tinman	protein_coding
ENSMUSG00000015597	57908	Zfp318	2610034E08Rik, D530032D06Rik, TZF, Znf318	protein_coding	E020	-1.75669	0.252818	E003	0.407016	0.506549	E006		0.865564	E012	0.169594	0.882805
ENSMUSG00000015599	106763	Ttbk1	AU017937, AW048023, C330008L01Rik	protein_coding
ENSMUSG00000015605	20807	Srf	AW049942, AW240594	protein_coding	E002	0.121736	0.727532	E002	0.245556	0.356077	E002		0.990471	E002	0.138216	0.888507
ENSMUSG00000015619	14462	Gata3	Gata-3, jal	protein_coding	ENSMUSG00000079602+ENSMUSG00000015619:E001		0.464186
ENSMUSG00000015627	14464	Gata5		protein_coding
ENSMUSG00000015647	16776	Lama5	AA408760, AA408762, AI853660, laminin-511, mKIAA0533, [a]5	protein_coding
ENSMUSG00000015652	70358	Steap1	2410007B19Rik, Prss24, Steap	protein_coding
ENSMUSG00000015653	74051	Steap2	4921538B17Rik, AI930049, AW045895, IPCA-1, IPCA1, PCANAP1, STAMP1, STMP	protein_coding
ENSMUSG00000015656	15481	Hspa8	2410008N15Rik, Hsc70, Hsc71, Hsc73, Hsp73, Hspa10	protein_coding	ENSMUSG00000096263+ENSMUSG00000064791+ENSMUSG00000095118+ENSMUSG00000015656:E037	-1.05999	0.0260259	ENSMUSG00000096263+ENSMUSG00000064791+ENSMUSG00000095118+ENSMUSG00000015656:E028	-0.12773	0.825527	ENSMUSG00000096263+ENSMUSG00000064791+ENSMUSG00000095118+ENSMUSG00000015656:E016	-0.0929768	0.249588	ENSMUSG00000096263+ENSMUSG00000064791+ENSMUSG00000095118+ENSMUSG00000015656:E031	0.569162	0.434114									0.01	0	0	0	0	0	-0.03	7.83402e+09																	0
ENSMUSG00000015659	321007	Serac1	4930511N22Rik, D17Ertd141e	protein_coding	E011		0.298012	E018		0.702173	E010		0.917828	E007		0.882805			-0.09	0.78
ENSMUSG00000015665	245533	Awat1	Dgat2l3	protein_coding	E004		0.799987	E003		0.986494	E005		0.981575	E005		0.949039
ENSMUSG00000015668	72621	Pdzd11	1810012H22Rik, 2310079D11Rik, 2700099C19Rik, AI854765, Pdzk11	protein_coding	E008	0.171266	0.392716	E006		0.959067	E008		0.898448	E008	0.129	0.908313
ENSMUSG00000015671	19166	Psma2	Lmpc3	protein_coding	E008	0.0389627	0.961062	E008	0.114248	0.817564	E008	0.115057	0.64487	E004	-0.0370725	0.97132
ENSMUSG00000015672	75398	Mrpl32	0610033O15Rik	protein_coding	E002	-0.00925204	0.986923	E001		0.999699	E003		0.994168	E003		0.90623
ENSMUSG00000015697	84505	Setdb1	AU022152, ESET, KMT1E, mKIAA0067	protein_coding	E027	-0.949061	0.592297	E023	0.436874	0.083334	E011	-0.128974	0.600339	E023	0.30068	0.56171																													0.34	1.67	0.25	1.18	0.23
ENSMUSG00000015702	71790	Anxa9	1110003P15Rik, 2310069F17Rik	protein_coding	E019		0.155877	E003		0.866506	E004		0.986474	E004		0.999937
ENSMUSG00000015709	11864	Arnt2	bHLHe1, Hif-2b, mKIAA0307	protein_coding	E001		0.848007	E001		0.764883
ENSMUSG00000015711	229589	Prune	9230112O05Rik, C130058A12, DRES-17, HTCD37, Prune-M1, PRUNEM1	protein_coding	E005	0.0753023	0.807175	E005		0.908937	E004		0.961239	E007	0.0788519	0.95909
ENSMUSG00000015714	76893	Lass2	0610013I17Rik, AI225939, Lass2, TRH3	protein_coding	E024	-0.361943	0.0199716	E008	-0.0885439	0.800096	E012	0.107903	0.667322	E008	-0.0924721	0.703586
ENSMUSG00000015721	23968	Nlrp5	Mater, Nalp5, Op1, PAN11	protein_coding
ENSMUSG00000015733	12343	Capza2	1110053K06Rik, AW208808, Cappa2	protein_coding	E026	-0.038472	0.0357133	E020	0.0713357	0.38646	E014	0.2911	0.919469	E016	0.0917349	0.727232	-0.07	0.25	-0.07	0.29	-0.07	0.31	-0.07	0.37
ENSMUSG00000015745	67220	Plekho1	2810052M02Rik, Ckip1, JZA-20, Jza2	protein_coding	E002	-0.102743	0.687166	E010		0.833443	E010		0.879781	E012	0.26001	0.934817																																	-0.03
ENSMUSG00000015747	22365	Vps45	AI462172, AW554165, mVps45	protein_coding	E017	-0.303679	0.213964	E003	0.324615	0.169728	E012		0.390313	E012	0.294839	0.826051
ENSMUSG00000015748	70767	Prpf3	3632413F13Rik	protein_coding	E025	-0.277335	0.0157838	E024	-0.225694	0.546886	E025		0.222229	E025	-0.24052	0.296427
ENSMUSG00000015749	66471	Anp32e	2810018A15Rik, AI047746, AI326868, CPD1, LANP-L, LANPL, mLANP-L	protein_coding	E023	-0.57753	0.13842	E011	0.137464	0.59263	E018		0.820088	E023	-0.639737	0.392783	-0.01	0.04	-0.01	0.04	-0.01	0.04	-0.01	0.03									-0.01	0.03	0.01	0.03	0	0.03	0	0			0.12	0.55	0.15	1.27	0.13	0.86
ENSMUSG00000015750	226548	Aph1a	6530402N02Rik, APH-1a	protein_coding	E009		0.548578	E009		0.943177	E006		0.990471	E001		0.931919
ENSMUSG00000015755	68652	Tab2	1110030N06Rik, A530078N03Rik, Map3k7ip2, mKIAA0733	protein_coding	E006	-0.187617	0.265506	E001	0.117154	0.71258	E006	-0.223908	0.357215	E006	-0.134073	0.841577					0.22	51.04
ENSMUSG00000015757	67418	Ppil4	3732410E19Rik, 3830425H19Rik, AI788954, AW146233, PPIase	protein_coding	E008	-0.596881	0.195394	E013	0.104103	0.959134	E007		0.903082	E021	-0.0994991	0.460422									0.19	13.01					0.12	1.21
ENSMUSG00000015759	12793	Cnih	0610007J15	protein_coding	E006	0.0783581	0.776384	E005	-0.0372571	0.994126	E001		0.999975	E001	0.012757	0.999937
ENSMUSG00000015766	13860	Eps8	AW261790	protein_coding	E006	0.160178	0.367264	E005	0.279616	0.73014	E005	0.241299	0.486336	E007	0.112261	0.862376	0.02	0.3	0.08	0.4	0	0.05	-0.01	0.29															-0.08	0.33			0.01	0.05	0	0.05
ENSMUSG00000015776	20933	Med22	AW212655, AW558812, Surf-5, Surf5	protein_coding	E002	0.110031	0.187343	E001	-0.123558	0.66922	E009	0.254242	0.853381	E002	0.0602304	0.924593									0.02	0.79	0	0	0.01	0.04	0	0
ENSMUSG00000015787	80908	Abo	NAGAT	protein_coding
ENSMUSG00000015790	20930	Surf1	0610010F23Rik, Surf-1	protein_coding	E005	1.12787	0.417244	E002	0.187562	0.78429	E002		0.323884	E004	0.204858	0.313863	-0.02	0.14									0.1	0.48			0.14	1.94																	-0.39
ENSMUSG00000015804	66999	Med28	1500003D12Rik, AI451633, AU045690, Eg1, FKSG20, magicin	protein_coding	E012	-0.16887	0.682928	E005	-0.51817	0.874974	E006		0.973563	E008	0.0934283	0.829384
ENSMUSG00000015806	110391	Qdpr	2610008L04Rik, D5Ertd371e, Dhpr, PKU2	protein_coding	E001	-0.237566	0.00014373	E010	-0.0553533	0.841002	E020	0.304796	0.162743	E001	-0.171749	0.387705																	0	0	0	0	0	0	0.01	0
ENSMUSG00000015812	14714	Gnrh1	Gnrh, Gnrh2, hpg, LHRH, Lhrh1, Lnrh	protein_coding	E001		0.928583
ENSMUSG00000015829	21960	Tnr	J1-tenascin, janusin, restrictin, TN-R	protein_coding	E022		0.965332
ENSMUSG00000015837	18412	Sqstm1	A170, OSF-6, Osi, p62, STAP	protein_coding	E019	1.07481	0.376846	E017	0.0550975	0.211975	E011	-0.0310183	0.877925	E006	0.459181	0.457429																																	0.01
ENSMUSG00000015839	18024	Nfe2l2	AI194320, Nrf2	protein_coding	E005	0.915416	0.391516	E005	0.217065	0.589024	E005	-0.330512	0.246653	E002	-0.0473457	0.710442
ENSMUSG00000015843	20183	Rxrg	Nr2b3	protein_coding
ENSMUSG00000015846	20181	Rxra	9530071D11Rik, Nr2b1, RXRalpha1	protein_coding	E005	0.371955	0.0575179	E020	0.0178888	0.854499	E012	-0.0861076	0.767507	E016	0.0666733	0.491647
ENSMUSG00000015850	229595	Adamtsl4	Tsrc1	protein_coding	E012	-0.181059	0.569931	E013	-0.178835	0.803129	E013		0.687633	E006	0.185944	0.811564
ENSMUSG00000015852	80891	Fcrls	2810439C17Rik, 9330158F12, Fcrh2, FcRH2sc, IFGP2, IgSR, MMAN-g, moFcRH2sc, Msr2	protein_coding
ENSMUSG00000015854	11801	Cd5l	1/6, AAC-11, AI047839, Api6, CT2, Pdp, Sp-alpha	protein_coding
ENSMUSG00000015869	67763	Prpsap1	5730409F23Rik, PAP39	protein_coding	E013	-0.950304	0.0173275	E009	0.592187	0.471884	E016		0.871237	E016	-0.187197	0.819376																																	0
ENSMUSG00000015879	58227	Fam184b	9630031F12Rik, AB041544	protein_coding
ENSMUSG00000015880	54392	Ncapg	5730507H05Rik, Hcapg, MFT.M05.13	protein_coding	E011	-0.368753	0.0874445	E005		0.645138	E016		0.484132	E011		0.694472									0.1	0.85	0.02	0.34
ENSMUSG00000015882	209707	Lcorl	Mlr1	protein_coding	E001		0.415557	E004		0.327937	E004		0.900306	E001		0.954174			-0.37	3.79
ENSMUSG00000015889	16993	Lta4h		protein_coding	E006	0.105556	0.406224	E001	0.0919657	0.284906	E009	-0.175559	0.0708286	E007	0.120815	0.41572
ENSMUSG00000015890	71761	Amdhd1	1300019J08Rik	protein_coding
ENSMUSG00000015932	56431	Dstn	2610043P17Rik, ADF, AU042046, corn1, Dsn, sid23p	protein_coding	E004	-0.074787	0.109112	E002	0.0180252	0.794717	E001	0.0260848	0.592294	E003	0.0308068	0.849883
ENSMUSG00000015937	26914	H2afy	H2AF12M, macroH2A1, mH2a1	protein_coding	E009	-0.304653	0.353927	E008	-0.132746	0.232919	E007	0.307753	0.468969	E007	0.222099	0.584716																	-0.03	0.17			0.06	7.35	0.05	1.05
ENSMUSG00000015942	114674	Gtf2ird2	1700012P16Rik	protein_coding	E026	0.221891	0.26803	E030		0.734734	E026		0.541979	E026		0.744262																									0.16	0.67					0.18	0.66
ENSMUSG00000015943	69168	Bola1	1810037G04Rik	protein_coding	E002		0.897945	E003		0.942134	E002		0.981575	E002		0.993902
ENSMUSG00000015944	80909	Gatsl2	7530428J21Rik, AW742413, Gats, Gatsl1	protein_coding	E005		0.482384	E005		0.572163	E010		0.999975	E010		0.765443
ENSMUSG00000015947	14129	Fcgr1	AI323638, AV092959, CD64, FcgammaRI, IGGHAFC	protein_coding	E001	0.0748707	0.572485	E001	-0.0376816	0.917988	E004	0.0167114	0.999975	E002	0.0863152	0.816684
ENSMUSG00000015950	17969	Ncf1	Ncf-1, NOXO2, p47<phox>, p47phox	protein_coding	E001	0.599857	0.75177	E015	-0.152096	0.888383	E003	0.0610208	0.848648	E015	-0.215125	0.880203									0.03	7.11	0.05	1.78
ENSMUSG00000015957	22411	Wnt11		protein_coding
ENSMUSG00000015961	11566	Adss	Adss2, AI314886, AS	protein_coding	E011	0.113906	0.505461	E013	-0.162939	0.757935	E012	-0.0643833	0.990681	E011	0.140196	0.620011
ENSMUSG00000015962	69428	1700016C15Rik		protein_coding
ENSMUSG00000015966	50905	Il17rb	Evi27, IL-17ER, IL-17Rh1, Il17br, IL17RH1	protein_coding
ENSMUSG00000015968	12289	Cacna1d	8430418G19Rik, C79217, Cacnl1a2, Cchl1a, Cchl1a2, D-LTCC	protein_coding	E007		0.542824	E001		0.990009	E001		0.992845	E001		0.982919
ENSMUSG00000015970	218865	Chdh	AU041472, D630034H06Rik	protein_coding
ENSMUSG00000015971	56249	Actr8	5730542K05Rik, ARP8	protein_coding	E007	-0.293314	0.428147	E002	0.171884	0.845006	E007		0.457544	E007	-0.211222	0.836825
ENSMUSG00000015980	76612	Lrrc27	1700071K18Rik, 2310044E02Rik	protein_coding	E008		0.521211	E020		0.876635	E015		0.820088	E013		0.96223					0.12	0.46	0.2	0.73
ENSMUSG00000015981	57740	Stk32c	PKE, Pkek, YANK3	protein_coding	E001		0.677289	E001		0.990009
ENSMUSG00000015994	14272	Fnta	FTA	protein_coding	E006	0.0760261	0.80358	E002	0.0566414	0.998895	E009		0.995836	E004	-0.051847	0.974689
ENSMUSG00000016018	72198	Skiv2l2	2610528A15Rik, mKIAA0052	protein_coding	E025	0.228299	0.509546	E016	0.317437	0.382355	E016	0.228925	0.717268	E019	-0.225709	0.41572
ENSMUSG00000016024	16803	Lbp	Bpifd2, Ly88	protein_coding
ENSMUSG00000016028	12614	Celsr1	crash, Crsh, Scy	protein_coding	E001		0.963774
ENSMUSG00000016087	14247	Fli1	EWSR2, Fli-1, SIC-1, Sic1	protein_coding	E007	0.139515	0.338101	E002	0.123781	0.884352	E002		0.837584	E002	0.155625	0.882667
ENSMUSG00000016128	243362	Stard13	DLC2, GT650	protein_coding
ENSMUSG00000016150	23963	Tenm1	Odz1, Odz2, TCAP-1, Ten-m1	protein_coding
ENSMUSG00000016179	215303	Camk1g	CaMKIgamma, CLICK-III	protein_coding
ENSMUSG00000016181	215193	Diexf	AA408296, AW045375, Def	protein_coding	E007	-0.0655873	0.925079	E003		0.88891	E009		0.922156	E008		0.885966
ENSMUSG00000016194	15483	Hsd11b1		protein_coding	E004		0.203353	E003		0.968603
ENSMUSG00000016200	329324	Syt14	B230320I09Rik, sytXIV	protein_coding
ENSMUSG00000016206	14991	H2-M3	H-2M3, Hmt, M3a, R4B2	protein_coding	E007	-0.276976	0.357947	E001	0.131422	0.92435	E005		0.927325	E005	0.156642	0.852243
ENSMUSG00000016239	74365	Lonrf3	4932412G04Rik, 5730439E01Rik, A830039N02Rik, AU023707, Rnf127	protein_coding	E001	0.129315	0.279068	E008	0.631621	0.56084	E001		0.331476	E002	0.252367	0.559587							0.03	0.17
ENSMUSG00000016252	67126	Atp5e	2410043G19Rik, ATPE, AV000645	protein_coding	E005	-0.370452	0.754223	E002	-0.0368912	0.994097	E008	0.0550785	0.999975	E005	-0.217401	0.969554
ENSMUSG00000016253	57314	Th1l	2410003I03Rik, C77797, Th1, Th1l	protein_coding	E019	-0.881185	0.305304	E006	0.137882	0.927686	E016		0.981575	E013	0.110322	0.919698																															0.01	0.07
ENSMUSG00000016255	545486	Tubb1	2810484G07Rik, M(beta)1	protein_coding	E004		0.824901
ENSMUSG00000016256	64138	Ctsz	AI787083, AU019819, CTSX, D2Wsu143e	protein_coding	E001	-0.0151086	0.701711	E005	0.0226116	0.890907	E002	-0.0128706	0.768425	E001	-0.0150069	0.883103
ENSMUSG00000016257	66390	Slmo2	2310042G06Rik, AA407013	protein_coding	E012	0.112291	0.525512	E003	-0.082665	0.795927	E015		0.870785	E014	0.0673624	0.992037	0.03	0.13	0	0	0	0	-0.01	0
ENSMUSG00000016262	214791	Sertad4	4833404A09, C130018M11Rik	protein_coding
ENSMUSG00000016283	14990	H2-M2	H-2M2, Thy19.4	protein_coding	E001	1.15834	0.474359	E001		0.698987	E005		0.928689	E005		0.744707
ENSMUSG00000016308	22209	Ube2a	HHR6A, HR6A, Mhr6a	protein_coding	E006	-0.108447	0.404808	E005	0.0771349	0.840122	E005		0.983765	E005	0.0261444	0.999937																																	0
ENSMUSG00000016319	11740	Slc25a5	Ant2	protein_coding	E009	-0.112576	0.0762231	E009	-0.0504098	0.563042	E009	-0.090532	0.865205	E005	-0.404724	0.202017
ENSMUSG00000016327	67821	Atp1b4	1110020B02Rik	protein_coding
ENSMUSG00000016344	66496	Ppdpf	0610012G23Rik, 2610317A05Rik, 2700038C09Rik, 3110053G12Rik	protein_coding	E009	0.211422	0.637304	E005		0.815811	E008		0.931113	E011	0.0981286	0.843538									0	0.08	-0.01	0.07			0	0.11
ENSMUSG00000016346	16536	Kcnq2	HNSPC, KQT2, Nmf134	protein_coding
ENSMUSG00000016349	13628	Eef1a2	Eef1a, S1, wasted, wst	protein_coding
ENSMUSG00000016356	73368	Col20a1	1700051I12Rik	protein_coding	E021		0.467849	E041		0.60779	E041		0.811419	E027		0.770769
ENSMUSG00000016382	102866	Pls3	AI115446, AL024105, T-fimbrin	protein_coding	E025	-0.931821	0.512228	E005		0.895497	E017		0.986305	E004		0.825631	0.01	0.1
ENSMUSG00000016386	77015	Mpped2	239Fb, 2700082O15Rik, AV354767, AW060960	protein_coding
ENSMUSG00000016409	67050	Nkap	2610020O08Rik, AA987160, AI849147, AL024236	protein_coding	E011	-0.0763957	0.658409	E010		0.979782	E011		0.379899	E011		0.933134
ENSMUSG00000016427	54405	Ndufa1	1810049F12Rik, MWFE	protein_coding	E003	-0.00907025	0.985812	E003	-0.0383655	0.986494	E001		0.942523	E002	0.0198035	0.993273
ENSMUSG00000016458	22431	Wt1	D630046I19Rik, Wt-1	protein_coding
ENSMUSG00000016477	13557	E2f3	E2f3a, E2F3b, mKIAA0075	protein_coding	E009		0.23338	E003		0.633179	E003		0.892412	E001		0.88118
ENSMUSG00000016481	12946	Cr1l	Crry, Mcp, mCRY	protein_coding	E006	0.0712013	0.518799	E008	0.0470192	0.967422	E003	-0.164943	0.603154	E002	-0.123225	0.753173
ENSMUSG00000016487	67533	Ppfibp1	4632409B19Rik, AW214454, AW261454	protein_coding	E025	0.185496	0.293353	E026	0.213347	0.415206	E009	-0.134354	0.743565	E023	0.339583	0.637302					0.09	0.53			0.22	1.18					0.14	0.59															0.05	0.21
ENSMUSG00000016493	17221	Cd46	Mcp	protein_coding
ENSMUSG00000016494	12490	Cd34	AU040960	protein_coding
ENSMUSG00000016495	67759	5033414D02Rik	1110007H22Rik, 5033414D02Rik, AI852040, Plg-R(KT), Plg-RKT	protein_coding	E016	-0.517374	2.58095e-05	E024	0.281208	0.742441	E016	-0.24761	0.470138	E016	-0.226879	0.372332			-0.06	0.88																					-0.02	0.11
ENSMUSG00000016496	60533	Cd274	A530045L16Rik, B7h1, Pdcd1l1, Pdcd1lg1, Pdl1	protein_coding	E007	-0.018304	0.483473	E002	0.118046	0.927483	E004	-0.0152968	0.999975	E004	-0.0290938	0.972365
ENSMUSG00000016498	58205	Pdcd1lg2	B7-DC, Btdc, F730015O22Rik, PD-L2	protein_coding	E006		0.00115824	E006		0.363111	E006		0.877717	E006		0.435413
ENSMUSG00000016503	66596	Gtf3a	2010015D03Rik, 2610111I01Rik, 5330403M05Rik	protein_coding	E003		0.25195	E005		0.999564	E006		0.604224	E003		0.985605
ENSMUSG00000016510	76366	Mtif3	2810012L14Rik, AI414549	protein_coding	E003		0.798649	E007		0.73994	E003		0.688266	E004		0.881474
ENSMUSG00000016520	140887	Lnx2	9630046H24, AW209022	protein_coding	E012	0.297957	0.0820899	E012	0.177414	0.750203	E013		0.533622	E012	0.205624	0.638318
ENSMUSG00000016524	329244	Il19		protein_coding
ENSMUSG00000016526	226419	Dyrk3	BC006704	protein_coding	E001		0.64833	E001		0.198127	E001		0.816706	E001		0.979392
ENSMUSG00000016528	17164	Mapkapk2	AA960234, MAPKAP-K2, MK-2, MK2, Rps6kc1	protein_coding	E005	0.10382	0.518496	E007	-0.0755252	0.683064	E006	-0.0356086	0.754355	E002	-0.0442912	0.858035
ENSMUSG00000016529	16153	Il10	CSIF, Il-10	protein_coding
ENSMUSG00000016534	16784	Lamp2	CD107b, Lamp-2, Lamp-2a, Lamp-2b, Lamp-2c, Mac3	protein_coding	E003	-0.157091	0.0381805	E010	0.0400714	0.14263	E015	0.435678	0.610828	E014	0.027496	0.487082
ENSMUSG00000016541	54138	Atxn10	AI325283, C77170, E46, Sca10, TEG-169, Tex169	protein_coding	E006	0.0556771	0.677611	E006	0.0579371	0.839998	E006	0.0596094	0.84893	E006	0.046452	0.840482
ENSMUSG00000016552	239554	Foxred2	A430097D04Rik, D15Bwg0759e, Gm304	protein_coding	E003		0.0711396	E006		0.932639	E003		0.848648	E009		0.923836
ENSMUSG00000016554	55944	Eif3d	66/67kDa, AA407891, eIF3p66, Eif3s7	protein_coding	E002	0.0231437	0.938482	E005	0.178625	0.849056	E015		0.813672	E012	-0.111805	0.766231
ENSMUSG00000016559	15078; 15081; 544973; 625328; 627371; 667250; 101056659	H3f3b	H3.3A	protein_coding	E002	-0.156562	0.0958205	E002	-0.0962802	0.434142	E009	0.111022	0.592294	E002	-0.0813953	0.786898
ENSMUSG00000016619	18141	Nup50	1700030K07Rik, AI413123, Npap60	protein_coding	E001	0.223903	0.521898	E006	0.216398	0.866409	E006		0.958357	E001	0.246196	0.755365
ENSMUSG00000016624	271305	Phf21b	A730032D07Rik	protein_coding	E007		0.581179
ENSMUSG00000016626	76858	Nlrp14	4921520L01Rik, GC-LRR, Nalp-iota, Nalp14, Nalp14l	protein_coding
ENSMUSG00000016637	67042	Ift27	2600013G09Rik, Rabl4	protein_coding	E005		0.424952	E005		0.312626	E006		0.949832	E007		0.943195
ENSMUSG00000016664	23970	Pacsin2	AI197433	protein_coding	E011	0.0952108	0.246049	E017	-0.13296	0.832779	E003	-0.10373	0.892488	E011	0.0889528	0.652442
ENSMUSG00000016756	12763	Cmah		protein_coding
ENSMUSG00000016757	223723	Ttll12	BC055368, D430005B17	protein_coding	E014	0.204662	0.675996	E005		0.415645	E008		0.738164	E002	-0.106374	0.924548			-0.03	0.11	0.01	0.13	0	0.12
ENSMUSG00000016758	12124	Bik	Biklk, Blk, Nbk	protein_coding
ENSMUSG00000016763	64706	Scube1	7330410C13Rik, A630023E24Rik	protein_coding
ENSMUSG00000016831	268741	Tox4	5730589K01Rik, A630040M18, AA410149, LCP1	protein_coding	E014	0.722963	0.762372	E004	-0.210502	0.689917	E016	0.0565544	0.989385	E020	0.141629	0.661998
ENSMUSG00000016833	68735	Mrps18c	1110037D14Rik	protein_coding	E010	0.142595	0.305713	E012	0.100901	0.954758	E012		0.845937	E010	0.0858387	0.925357	0	0	0	0.03	0	0.03
ENSMUSG00000016918	240725	Sulf1	AI467640, AW121680, mKIAA1077	protein_coding
ENSMUSG00000016921	67996	Srsf6	1210001E11Rik, AI314910, AW146126, Sfrs6	protein_coding	E005	-0.202934	0.222784	E008	0.061958	0.819423	E003	0.0955023	0.678225	E005	-0.0789319	0.955644
ENSMUSG00000016933	18803	Plcg1	AI894140, Cded, Plc-1, Plc-gamma1, Plcg-1	protein_coding	E026	-1.17587	0.00939723	E035	0.186021	0.893081	E019		0.479679	E016	-0.288499	0.864346	-0.01	0.05	0.02	0.09
ENSMUSG00000016940	70382	Kctd2	2310012I15Rik	protein_coding	E011	0.340152	0.747685	E011	0.547752	0.535884	E008		0.961587	E011	0.412625	0.897063					-0.31	2.35
ENSMUSG00000016942	71753	Tmprss6	1300008A22Rik	protein_coding
ENSMUSG00000016946	69259	Kctd5	2610030N08Rik, mKIAA0176	protein_coding	E002	-0.14099	0.779025	E004		0.884854	E005		0.999944	E005	0.256918	0.873232
ENSMUSG00000016982	195236	Pom121l2	Gm24	protein_coding
ENSMUSG00000016984	68145	Etaa1	5730466H23Rik, AA672646	protein_coding	E003		0.79083	E005		0.98952	E005		0.984076	E005		0.993902																									0.07	0.26	0.03	0.19			0.09	0.35
ENSMUSG00000016995	17183	Matn4	matrilin-4	protein_coding
ENSMUSG00000016998	20941	Svs4	Svp-2, Svp-4, Svp2, Svp4, SVS-IV	protein_coding
ENSMUSG00000017000	20945	Svs6	MSVSP99, Svp6	protein_coding
ENSMUSG00000017002	20568	Slpi		protein_coding	E006	0.765215	0.376743	E002	0.0376817	0.981157	E003	0.0219246	0.999944	E003	0.0488543	0.897375
ENSMUSG00000017003	64335	Svs3a	9530026M05Rik, BB121242, Semg2, Svp-3, Svp3, Svs3	protein_coding
ENSMUSG00000017004	20944	Svs5	BB115186, Semg1, Svp-1, Svp1, Svp5	protein_coding
ENSMUSG00000017007	19668	Rbpjl	RBP-L, Rbpsuhl	protein_coding
ENSMUSG00000017009	20971	Sdc4	AA959608, AW108331, ryudocan, Synd4, syndecan-4	protein_coding	E005	3.61461	0.841844	E005		0.973292	E005		0.960396	E005		0.966364
ENSMUSG00000017049	67929	Ccdc70	1700112P19Rik	protein_coding
ENSMUSG00000017057	16164	Il13ra1	AI882074, CD213a1, IL-13r[a], Il13ra, NR4	protein_coding	E002	0.34745	0.140647	E003	0.237535	0.108628	E004	0.144424	0.378439	E009	-0.10743	0.836444
ENSMUSG00000017064	28078	Prl5a1	1600013P04Rik, D13Wsu14e, PLP-L, Prlpl, RP23-231P12.2	protein_coding
ENSMUSG00000017119	17966	Nbr1	mKIAA0049	protein_coding	E059	-0.140697	0.00121628	E039	0.328367	0.0270332	E040	0.116166	0.506112	E059	-0.10654	0.249553	0.15	2.43	0.08	0.36	0.12	0.93	0.17	4.27							-0.03	0.19
ENSMUSG00000017132	19157	Cyth1	CLM1, CTH-1, CYTIP, mKIAA4240, Pscd1	protein_coding	E024	0.257651	0.490436	E017	-0.14712	0.628355	E004	0.038578	0.810169	E011	-0.0557921	0.832412
ENSMUSG00000017144	74194	Rnd3	2610017M01Rik, AI661404, Arhe, Rhoe	protein_coding	E006	-0.200339	0.464184	E008	-0.0826892	0.963543	E001		0.976216	E002	-0.0445923	0.924038
ENSMUSG00000017146	12189	Brca1		protein_coding	E010	-0.299497	0.174457	E003		0.173502	E009		0.48667	E019		0.703604
ENSMUSG00000017165	14459	Gast	GAS	protein_coding
ENSMUSG00000017167	53321	Cntnap1	AI841080, Caspr, NCP1, Nrxn4, p190, shm	protein_coding	E026		0.593029	E026		0.999564	E026		0.999975
ENSMUSG00000017176	68106	Nt5c3l	2610037D24Rik, AI841843, C330027I04Rik, Nt5c3l, RP23-392I3.10	protein_coding	E015	-0.847036	0.27327	E016		0.875081	E004		0.698986	E008		0.765389	-0.03	0.09	0	0.12			0.06	0.25
ENSMUSG00000017188	52469	Coa3	1810033A19Rik, Ccdc56, D11Ertd99e, HSPC009	protein_coding	E005	-0.454255	0.924758	E001	0.0390055	0.935345	E002		0.963018	E001	0.0424077	0.964701
ENSMUSG00000017195	69376	Zpbp2	1700017D11Rik, 2610022C02Rik, ZPBPL	protein_coding
ENSMUSG00000017204	57911	Gsdma	BB149167, Gsdm, Gsdm1, Gsdma1, H312E	protein_coding
ENSMUSG00000017210	23989	Med24	911GSE, AU040102, AW547152, D11Ertd307e, DRIP100, Gse2, Pparb2, Pparbp2, R75526, Thrap4, Trap100	protein_coding	ENSMUSG00000017210+ENSMUSG00000088169:E006	-0.157378	0.508631	ENSMUSG00000017210+ENSMUSG00000088169:E036	-0.416388	0.832726	ENSMUSG00000017210+ENSMUSG00000088169:E044	0.212465	0.868504	ENSMUSG00000017210+ENSMUSG00000088169:E012	0.134134	0.872966													-0.14	2.82
ENSMUSG00000017211	76758	Gsdma2	2200001G21Rik, 2210006M16Rik, 2210009F20Rik, 2210411P14Rik, Gsdm2, Gsdml2	protein_coding
ENSMUSG00000017221	22123	Psmd3	AI255837, AntP91a, D11Bwg1349e, Psd3, Tstap91a	protein_coding	E013	-0.306144	0.452466	E012	-0.401156	0.649495	E013	0.274008	0.718436	E010	0.203852	0.957914											-0.01	0.07
ENSMUSG00000017264	50912	Exosc10	p2, p3, p4, PM-Scl, PM/Scl-100, Pmscl2, RRP6	protein_coding	E011	-1.39397	0.28176	E030	0.16638	0.677301	E015	0.142314	0.898738	E009	-0.151926	0.811564	0	0	0	0	0	0	0	0																	-0.07	0.39	-0.13	3	-0.09	0.52	-0.07	0.24	0.05
ENSMUSG00000017286	67201	Glod4	1700082G03Rik, 2700085E05Rik, C81254	protein_coding	ENSMUSG00000017286+ENSMUSG00000049396+ENSMUSG00000017288:E072	-6.27662	0.0139428	ENSMUSG00000017286+ENSMUSG00000049396+ENSMUSG00000017288:E031	0.177961	0.563042	ENSMUSG00000017286+ENSMUSG00000049396+ENSMUSG00000017288:E061	-0.232963	0.167931	ENSMUSG00000017286+ENSMUSG00000049396+ENSMUSG00000017288:E060	-0.167684	0.389523	-0.01	0.03	0	0	-0.01	0.07	0	0.08																							0.01	0.07	0
ENSMUSG00000017288	68299	Vps53	2010002A08Rik, 2310040I21Rik, 3100002B05Rik, Hccs1	protein_coding	ENSMUSG00000017286+ENSMUSG00000049396+ENSMUSG00000017288:E072	-6.27662	0.0139428	ENSMUSG00000017286+ENSMUSG00000049396+ENSMUSG00000017288:E031	0.177961	0.563042	ENSMUSG00000017286+ENSMUSG00000049396+ENSMUSG00000017288:E061	-0.232963	0.167931	ENSMUSG00000017286+ENSMUSG00000049396+ENSMUSG00000017288:E060	-0.167684	0.389523	0	0.04	0	0.04	0	0.04	-0.01	0.04																							0.01	0.07
ENSMUSG00000017291	216965	Taok1	2810468K05Rik, AU020252, D130018F14Rik, Map3k16, Markk, mKIAA1361, Psk2	protein_coding	E001	-0.105743	0.0580261	E002	0.158134	0.890027	E014	0.160068	0.813672	E021	0.219102	0.892106
ENSMUSG00000017299	76233	Dnttip1	6430706C13Rik	protein_coding	E004	-0.262715	0.265506	E019		0.774727	E019		0.155223	E003	-0.386205	0.381863
ENSMUSG00000017300	21925	Tnnc2	Tncs	protein_coding
ENSMUSG00000017307	170789	Acot8	PTE-2, Pte1	protein_coding	E007	-0.438619	0.680022	E006		0.95495	E002		0.926558	E003		0.972365																									0	0.05					0.02	0.11
ENSMUSG00000017309	52685	Cd300lg	2310016B05Rik, Clm9, D11Ertd736e	protein_coding	E009		0.786257	E010		0.845885	E002		0.973563	E010		0.905691	-0.11	0.46
ENSMUSG00000017310	78239	Spint4	9230105I15Rik	protein_coding
ENSMUSG00000017311	217212	Pyy		protein_coding
ENSMUSG00000017314	50997	Mpp2	D11Bwg0652e, Dlg2, Dlgh2, Pals4	protein_coding
ENSMUSG00000017316	19064	Ppy	AV061413, IGSPP, PP	protein_coding
ENSMUSG00000017344	22370	Vtn	AI256434, Vn	protein_coding
ENSMUSG00000017376	18099	Nlk	AI194375	protein_coding	E019	0.16616	0.524609	E002		0.392323	E017		0.398837	E006	0.40403	0.531
ENSMUSG00000017386	22032	Traf4	A530032M13Rik, CART1, msp2	protein_coding	E001		0.639329	E005		0.788472	E002		0.746802	E006		0.953265															0.07	0.49
ENSMUSG00000017390	11676	Aldoc	AI847350, Aldo3, AU040929, Scrg2	protein_coding	E021	-0.231245	0.0235539	E013	0.108133	0.336169	E013	0.0946277	0.803703	E013	0.121639	0.233054	-0.01	0.04					-0.01	0.04
ENSMUSG00000017400	217154	Stac2	24b2, 24b2/STAC2, AW240854	protein_coding	E004	0.097926	0.91537	E004	0.247531	0.774577	E004		0.404003	E004	0.315964	0.487928
ENSMUSG00000017404	19921; 100045367	Rpl19		protein_coding	ENSMUSG00000086716+ENSMUSG00000017404:E012	-0.337172	0.382931	ENSMUSG00000086716+ENSMUSG00000017404:E012	-0.264301	0.828515	ENSMUSG00000086716+ENSMUSG00000017404:E012		0.349666	ENSMUSG00000086716+ENSMUSG00000017404:E006	0.207099	0.955584
ENSMUSG00000017405	140859	Nek8	4632401F23Rik, b2b1449Clo, jck	protein_coding	E024		0.0797683	E002		0.862629	E002		0.966708	E002		0.938847													0.09	0.59
ENSMUSG00000017412	12298	Cacnb4	3110038O15Rik, Cchb4, lethargic, lh	protein_coding	E002		0.0486151
ENSMUSG00000017417	72324	Plxdc1	2410003I07Rik, AI848450, Tem7	protein_coding	E014	-0.202282	0.642889	E009	0.229038	0.831364	E009		0.650587	E011	-0.137556	0.912358							0	0.05																									0.03
ENSMUSG00000017418	75869	Arl5b	4930587A11Rik, Arl8, AW146430	protein_coding	E008		0.660764	E010		0.853218	E008		0.868504	E008		0.822425
ENSMUSG00000017421	22680	Zfp207	8430401D15Rik, Zep	protein_coding	ENSMUSG00000089012+ENSMUSG00000017421:E035	-0.576738	4.867e-06	ENSMUSG00000089012+ENSMUSG00000017421:E026	-0.412255	0.705059	ENSMUSG00000089012+ENSMUSG00000017421:E019	0.0637436	0.603623	ENSMUSG00000089012+ENSMUSG00000017421:E035	-0.2382	0.460485	-0.11	309221					0.02	0.07																			-0.02	0.08
ENSMUSG00000017428	69077	Psmd11	1700089D09Rik, 1810019E17Rik, 2610024G20Rik, 2810055C24Rik, C78232, P44.5, S9	protein_coding	E037	0.0971408	0.555149	E006	-0.242162	0.920735	E033	0.0713152	0.885365	E037	0.112384	0.704394	0.08	0.33	0.11	1.07	0	0	0.12	1.37					-0.07	0.55	-0.05	0.24
ENSMUSG00000017446	56745	C1qtnf1	1600017K21Rik, CTRP1, Zsig37	protein_coding
ENSMUSG00000017453	19193	Pipox	LPIPOX, Pso	protein_coding
ENSMUSG00000017466	21858	Timp2	D11Bwg1104e, Timp-2	protein_coding	E002	0.0305775	0.910278	E004	-0.0546531	0.843638	E005	-0.0311844	0.999036	E003	0.0274033	0.981833
ENSMUSG00000017478	76014	Zc3h18	1190001B23Rik, 5830416A07Rik, Nhn1	protein_coding	E035	1.41321	0.0446495	E016	-0.178916	0.605764	E015	-0.15292	0.750133	E028	0.255734	0.500847	0	0.05	0.11	0.92	0.01	0.03	0.01	0.04
ENSMUSG00000017485	21974	Top2b	D230016L12Rik, Top-2	protein_coding	E006	-0.511797	0.0445573	E046	0.20009	0.516698	E006	-0.405136	0.313039	E006	-0.269704	0.702169	0	0	0	0	-0.02	0.08	-0.03	0.1
ENSMUSG00000017491	218772	Rarb	A830025K23, Hap, Nr1b2, RARbeta2	protein_coding	E001		0.914929
ENSMUSG00000017493	16010	Igfbp4	AI875747, Deb2, IGFBP-4	protein_coding
ENSMUSG00000017499	23834	Cdc6	CDC18L	protein_coding	E014	-0.341555	0.00756643	E014		0.0779668	E014		0.498889	E012		0.762494	-0.09	0.73	-0.14	0.52	-0.24	3.05	-0.23	8.65
ENSMUSG00000017548	52615	Suz12	2610028O16Rik, AI195385, AU016842, AW536442, D11Ertd530e, mKIAA0160	protein_coding	E004	-0.433544	0.0272024	E024	0.0685853	0.548718	E024		0.313039	E018	0.22533	0.763021	-0.07	0.2	0.01	0.04	-0.16	0.51	-0.11	0.25
ENSMUSG00000017550	237877	Atad5	C130052G03Rik, FRAG1, Gm17	protein_coding	E006	5.26217	0.09812	E028		0.944457	E001		0.64887	E028		0.913236	-0.05	0.27
ENSMUSG00000017561	54394	Crlf3	BB164954, Creme9, Cytor4	protein_coding	E015	0.16522	0.620619	E001	0.0478213	0.923124	E010	-0.126157	0.563721	E003	-0.0614161	0.924597	0.01	0.04	0.02	0.1	0.02	0.09	0	0.04
ENSMUSG00000017588	16675	Krt27	Krt1-c29, mIRSa3.1	protein_coding
ENSMUSG00000017607	217169	Tns4	9930017A07Rik, AA589547, AU016405, Cten	protein_coding	E002		0.911855	E006		0.559614	E001		0.984323	E001		0.955724
ENSMUSG00000017615	21927	Tnfaip1	Edp-1, Edp1, Tnfip1	protein_coding	E006	0.161826	0.089395	E006	0.211954	0.0874281	E004		0.124582	E006	0.158456	0.41572
ENSMUSG00000017631	109934	Abr	6330400K15Rik, AU042359	protein_coding	E029	0.185416	0.0198078	E029	0.19859	0.0287081	E017	-0.080173	0.526102	E029	0.231979	0.158204																																	0
ENSMUSG00000017639	268451	Rab11fip4	A730072L08Rik, mKIAA1821, RAB11-FIP4	protein_coding	E003	0.81	0.26065	E006		0.965204	E017		0.783931	E006		0.824111
ENSMUSG00000017652	21939	Cd40	AI326936, Bp50, GP39, HIGM1, IGM, IMD3, p50, T-BAM, Tnfrsf5, TRAP	protein_coding	E010		0.440311
ENSMUSG00000017664	228875	Slc35c2	C85957, CGI-15, D2Wsu58e, Ovcov1	protein_coding	E011	0.159449	0.129905	E032	-0.672853	0.645837	E011	0.11185	0.758057	E016	-0.464662	0.851334	0.02	0.37	0	0.03	0	0	0.01	0.04	0	0	0.01	0	0	0	0	0																	0.02
ENSMUSG00000017667	228876	Zfp334	D2Ertd535e	protein_coding	E001		0.272754	E001		0.999699	E001		0.999975	E001		0.885966
ENSMUSG00000017670	140579	Elmo2	1190002F24Rik, CED-12, mKIAA1834	protein_coding	E002	-0.0524651	0.101913	E026	0.117308	0.78429	E007	-0.0954059	0.910322	E002	-0.0514474	0.0175641	0	0	0	0	0	0	-0.01	0																	-0.02	0.08			-0.02	0.07			0.01
ENSMUSG00000017677	78889	Wsb1	1110056B13Rik, 2700038M07Rik	protein_coding	E010	-0.390548	0.354915	E008	0.45821	0.263588	E005	-0.0953899	0.941892	E020	0.126565	0.444089	0.01	0	0	0	0.01	0	0.01	0	0.15	25.36																							0.15
ENSMUSG00000017679	76080	Ttpal	3110080A02Rik, 5830472M02Rik	protein_coding	E017	-0.126101	0.393383	E004	0.427212	0.785799	E009		0.895558	E009	0.0994008	0.937957	0.03	0.11	0.01	0.07	0	0.03	0	0.04
ENSMUSG00000017686	59040	Rhot1	2210403N23Rik, AA415293, AF244542, AI834919, Arht1, C430039G08Rik, Miro1	protein_coding	E026	-0.254209	0.183508	E020	-0.188207	0.767697	E034	0.0581377	0.897322	E006	-0.188604	0.926953					0	0.07					-0.12	11.71	-0.1	1.38
ENSMUSG00000017688	30942	Hnf4g	NR2A2	protein_coding
ENSMUSG00000017692	246104	Rhbdl3	AI847581, Rhbdl4, Rhomr1, Vrho	protein_coding
ENSMUSG00000017697	11486	Ada		protein_coding	E014		0.686379
ENSMUSG00000017707	26943	Serinc3	AA959945, AA960047, AIGP1, DIFF33, Tde1, TMS-1	protein_coding	E006	0.0210533	0.22042	E003	-0.0563675	0.759265	E008	-0.0252503	0.968164	E006	0.0119741	0.787143
ENSMUSG00000017713	71776	Tha1	1300017K07Rik, GLY1	protein_coding	E006		0.000927209	E001		0.879907	E009		0.928848	E006		0.805783															-0.03	0.15
ENSMUSG00000017715	74451	Pgs1	2610019F11Rik, 4933424M23Rik, SAF	protein_coding	E010	-0.261525	0.0212303	E009	-0.0840429	0.874192	E013		0.830734	E008	0.114411	0.631352
ENSMUSG00000017716	11799	Birc5	AAC-11, Api4, survivin40, TIAP	protein_coding	E005	-0.364722	0.137424	E004		0.990028	E005		0.96664	E005		0.999921									0.09	205.12
ENSMUSG00000017718	71562	Afmid	9030621K19Rik, Ammd, FKF, formylase, Kf, KFA	protein_coding	ENSMUSG00000017718+ENSMUSG00000093485+ENSMUSG00000048277:E039	-0.240177	0.0703416	ENSMUSG00000017718+ENSMUSG00000093485+ENSMUSG00000048277:E012	-0.060337	0.562454	ENSMUSG00000017718+ENSMUSG00000093485+ENSMUSG00000048277:E011	-0.0579513	0.484132	ENSMUSG00000017718+ENSMUSG00000093485+ENSMUSG00000048277:E027	0.3286	0.744707					-0.06	0.18
ENSMUSG00000017720	73603	Trp53tg5	1700126L10Rik	protein_coding
ENSMUSG00000017721	78928	Pigt	2510012P17Rik, 4930534E15Rik, CGI-06, NDAP, Ndap7	protein_coding	E018	-0.0731536	0.51598	E016	-0.0673255	0.763912	E018	-0.0406599	0.912993	E016	-0.070125	0.79834
ENSMUSG00000017723	67701	Wfdc2	1600023A02Rik, HE4, WAP5	protein_coding
ENSMUSG00000017724	18612	Etv4	AW414408, Pea-3, Pea3	protein_coding
ENSMUSG00000017733	75526	Eppin	1700024E17Rik, Spinlw1	protein_coding
ENSMUSG00000017734	52840	Dbndd2	1110017A21Rik, 2900022J10Rik, AU041050, AW048677, D2Bwg0891e, Nkip, R74724	protein_coding	ENSMUSG00000017734+ENSMUSG00000090996+ENSMUSG00000045503:E030	-0.117219	0.0281992	ENSMUSG00000017734+ENSMUSG00000090996+ENSMUSG00000045503:E016	-0.386538	0.731124	ENSMUSG00000017734+ENSMUSG00000090996+ENSMUSG00000045503:E016		0.796869	ENSMUSG00000017734+ENSMUSG00000090996+ENSMUSG00000045503:E014	0.119752	0.782882							0.02	0.09
ENSMUSG00000017737	17395	Mmp9	AW743869, B/MMP9, Clg4b, MMP-9, pro-MMP-9	protein_coding	E018		0.0572283
ENSMUSG00000017740	57138	Slc12a5	KCC2, mKIAA1176	protein_coding
ENSMUSG00000017747	80860	Ghdc	D11Lgp1e	protein_coding	E014	0.297401	0.733698	E012		0.708129	E010		0.888571	E001		0.395509									0.27	4.73	0.13	0.56
ENSMUSG00000017754	18830	Pltp	Bpife, OD107	protein_coding	E013	0.99932	0.240199	E030	-0.381446	0.422501	E029	-0.23618	0.833955	E030	-0.496607	0.136116	0.01	0.1	0	0	0	0	0	0	0.07	0.48			0.05	0.19	0.07	0.41
ENSMUSG00000017756	20499	Slc12a7	AA408796, D13Ertd261e, Kcc4	protein_coding	E024	-0.0450118	0.22342	E003	-0.129862	0.351266	E013	0.0477848	0.970653	E008	0.0649563	0.895406
ENSMUSG00000017760	19025	Ctsa	AU019505, PPCA, Ppgb	protein_coding	E045	-0.398578	0.229688	E015	-0.0932387	0.51239	E012	0.220415	0.695279	E019	-0.0803371	0.34359	-0.01	0	0	0	-0.01	0	0	0	0.02	0.3			0.01	0.09	0	0.04									0	0	0	0	0	0	0	0	-0.39
ENSMUSG00000017764	71971	Zswim1	2410003H12Rik, AI850991, BB046916	protein_coding	E005		0.819342	E002		0.999699	E005		0.999975	E005		0.994315							0.02	0.11
ENSMUSG00000017765	20498	Slc12a4	AW546649, KCC1, RBCKCC1	protein_coding	E013	0.169883	0.410235	E016	-0.150182	0.869787	E015		0.897886	E020	-0.176936	0.636678																											0.07	0.64
ENSMUSG00000017767	75642	Spata25	1700020C07Rik, Tsg23	protein_coding
ENSMUSG00000017774	17913	Myo1c	C80397, mm1beta, MMIb, MYO1E, myr2, NMI	protein_coding	E002	-0.189638	0.468963	E021	-0.161109	0.56084	E021	-0.164469	0.641926	E011	0.104758	0.487928
ENSMUSG00000017776	12928	Crk	c-Crk, Crk-I, Crk-II, Crk-III, Crk3, CrkIII, Crko, p38	protein_coding	E006	0.11428	0.311753	E005	-0.0467331	0.85112	E009	0.0128709	0.993156	E006	0.0543168	0.922583																											-0.03	0.15	-0.03	0.2
ENSMUSG00000017778	12867; 100048613	Cox7c	Cox7c1, COXVIIc	protein_coding	E008		0.261944	E007		0.702173	E008		0.541348	E008		0.624234
ENSMUSG00000017781	18738	Pitpna	Pitpn, vb, vibrator	protein_coding	E014	-0.0353525	0.376743	E010	-0.340683	0.845391	E014	-0.0333332	0.618418	E010	-0.258491	0.894814	-0.11	0.59	0	0	0	0	0	0									0	0	0	0	0	0	0	0	0.02	0.1
ENSMUSG00000017801	21428	Mlx	bHLHd13, Tcfl4	protein_coding	E018	-0.104861	0.701801	E004	0.446633	0.740628	E018		0.929664	E007	0.10937	0.95909																											0.24	1.96			0.19	0.87
ENSMUSG00000017802	67998	Fam134c	1300010M03Rik, 4933404C01Rik, AI551748	protein_coding	E011	0.214628	0.362853	E004	-0.143907	0.748345	E002	0.0858674	0.754263	E005	-0.10735	0.659849	0.01	0.05	0.01	0.08	0	0.04	0.01	0.06
ENSMUSG00000017817	59091	Jph2	1110002E14Rik, JP-2, Jp2	protein_coding
ENSMUSG00000017830	80861	Dhx58	B430001I08Rik, D11Lgp2e, Lgp2, LPG2, RLR-3	protein_coding	E009	-0.239206	0.16571	E001	0.166873	0.771449	E004		0.767507	E007	0.249851	0.573925	-0.03	0.09	-0.04	0.11	-0.03	0.14	-0.02	0.08
ENSMUSG00000017831	271457	Rab5a	2410015H04Rik, AI663973, AU021172, nnyRab5a	protein_coding	E006	-0.105383	0.156996	E004	0.11672	0.734734	E006		0.739906	E006	-0.0570376	0.881888
ENSMUSG00000017832	75482	Hspb9	1700007H20Rik	protein_coding	E001		0.976591
ENSMUSG00000017837	71966	Nkiras2	2410003M04Rik, 4930527H08Rik, D630018G21Rik, KBRAS2	protein_coding	E009	-0.475623	0.534805	E005	-0.270433	0.579703	E016	-0.0653297	0.810195	E005	-0.212544	0.821906									0.01	0	0	0	0	0	0	0
ENSMUSG00000017843	26931	Ppp2r5c	2610043M05Rik, 2700063L20Rik, AI060890, AW545884, C85228, D12Bwg0916e, mKIAA0044	protein_coding	E013	-0.40328	0.233782	E007	0.0399662	0.988124	E014	0.0315111	0.962602	E003	0.0321891	0.989658			0.04	0.2	0.07	1.92	0.07	3.85
ENSMUSG00000017858	245866	Ift52	BC037708, NGD5	protein_coding	E018	0.149825	0.460882	E014	0.188464	0.804412	E018		0.89058	E003	-0.299756	0.527351
ENSMUSG00000017861	17865	Mybl2	B-Myb, Bmyb	protein_coding	E002	-2.00815	0.123759	E010		0.928935	E008		0.819797	E006		0.637302
ENSMUSG00000017868	27219	Sgk2	AI098171, AW146006, Sgkl	protein_coding
ENSMUSG00000017897	14049	Eya2	Eab1	protein_coding
ENSMUSG00000017914		BC034902		protein_coding
ENSMUSG00000017922	27372	Prl3c1	decidualin, PLP-J, Prlpi, Prlpj	protein_coding
ENSMUSG00000017929	56336	B4galt5	9430078I07Rik, AW049941, AW539721	protein_coding	E003	0.158059	0.289216	E003	0.0536346	0.848124	E003	0.0765653	0.78556	E003	0.108713	0.233054
ENSMUSG00000017943	228858	Gdap1l1	Gdap1l	protein_coding	E009		0.870678
ENSMUSG00000017950	15378	Hnf4a	HNF-4, Hnf4, Hnf4alpha, MODY1, Nr2a1, Tcf14	protein_coding
ENSMUSG00000017969	19223	Ptgis	Cyp8, Cyp8a1, Pgis	protein_coding
ENSMUSG00000017978	320405	Cadps2	A230044C21Rik, Caps-2, Caps2, Cpd2	protein_coding
ENSMUSG00000017999	228889	Ddx27	C86129	protein_coding	E011	-0.309036	0.1441	E021	-0.195062	0.521966	E020		0.869125	E020	-0.198012	0.75083											0.04	0.25			0	0.23
ENSMUSG00000018001	19159	Cyth3	AI648983, ARNO3, CLM3, Grp1, Pscd3	protein_coding	E005	-1.22384	0.518799	E007	-0.128532	0.419444	E012	0.0562252	0.979021	E017	0.0722524	0.844783
ENSMUSG00000018008	72318	Cyth4	2510004M07Rik, 5830469K17Rik, AI467541, mFLJ00017, Pscd4	protein_coding	E012	0.0204589	0.802984	E012	0.0324928	0.963749	E011	-0.0363274	0.970115	E004	0.038228	0.846578	-0.01	0	0	0	-0.01	0	-0.01	0
ENSMUSG00000018012	170758	Rac3	Rac1B	protein_coding	E003		0.406628	E003		0.562454	E010		0.898448	E008		0.991303
ENSMUSG00000018040	74778	Rrp7a	1110014J01Rik, AA408146, Kheg1	protein_coding	E001	-0.296295	0.648176	E015	-0.218343	0.169728	E015		0.691787	E015	-0.08004	0.808858
ENSMUSG00000018042	109754	Cyb5r3	0610016L08Rik, 2500002N19Rik, C85115, Dia-1, Dia1, WU:AL591952.1-001, WU:AL591952.1-002, WU:AL591952.1-003, WU:Cyb5r3	protein_coding	E013	-0.0904843	0.527079	E013	-0.105703	0.499153	E006	-0.0429999	0.832615	E003	0.0424327	0.664585
ENSMUSG00000018068	70422	Ints2	2810417D08Rik, AA408260, AI987735, mKIAA1287	protein_coding	E001	-0.460978	0.0688569	E008		0.779323	E036		0.408674	E014	0.537385	0.638525
ENSMUSG00000018076	76199	Med13l	2210413I17Rik, 6330591G05Rik, 9030618F05Rik, mKIAA1025, Thrap2, Trap240L	protein_coding	E030	-0.33648	0.191838	E023	0.176816	0.871975	E026		0.86525	E013	-0.270217	0.772174
ENSMUSG00000018102	68024; 319179; 319181	Hist1h2bc	2610022J01Rik, H2bfs, R74621	protein_coding	E001	0.0405608	0.650091	E001	0.0249343	0.980903	E001		0.996175	E001	0.0212082	0.961987
ENSMUSG00000018126	207495	Baiap2l2	BC048937	protein_coding
ENSMUSG00000018143	17135	Mafk	AW061068, NF-E2, Nfe2u	protein_coding	E007	-0.594376	0.221134	E002	0.0693739	0.995975	E007		0.75502	E007	-0.30519	0.883671
ENSMUSG00000018160	19014	Med1	AI480703, CRSP210, DRIP205, l11Jus15, PBP, Pparbp, TRAP220	protein_coding	E009	0.207942	0.442746	E011	0.425272	0.349848	E023	-0.175533	0.890328	E011	0.488704	0.119525									-0.01	0.13	-0.01	0.04
ENSMUSG00000018166	13867	Erbb3	C76256, Erbb-3, Erbb3r, Her3	protein_coding	E008		0.856682	E001		0.998489	E001		0.942828	E001		0.983033
ENSMUSG00000018167	59045	Stard3	es64, Mln64	protein_coding	E030	0.144385	0.158237	E025	-0.361686	0.731124	E030	0.157171	0.282144	E024	-0.132929	0.641272																																	-0.01
ENSMUSG00000018168	22780	Ikzf3	5830411O07Rik, Aiolos, Zfpn1a3, Znfn1a3	protein_coding	E001		0.785924
ENSMUSG00000018169	17305	Mfng	AW546563	protein_coding	E012		0.87493	E015		0.967051	E001		0.991976	E015		0.971761
ENSMUSG00000018171	75909	Vmp1	3110098I04Rik, 4930579A11Rik, AI787464, ni-2, Tango5, Tmem49	protein_coding	ENSMUSG00000065455+ENSMUSG00000018171:E003	-0.307514	0.0303816	ENSMUSG00000065455+ENSMUSG00000018171:E008	0.141814	0.0771516	ENSMUSG00000065455+ENSMUSG00000018171:E008	0.120602	0.323442	ENSMUSG00000065455+ENSMUSG00000018171:E010	-0.258831	0.105486
ENSMUSG00000018189	56207	Uchl5	5830413B11Rik, Uch37	protein_coding	E011	-0.162066	0.521149	E008	-0.168514	0.821174	E001		0.937321	E005	0.13111	0.834767
ENSMUSG00000018196	69367	Glrx2	1700010P22Rik, AI645710, Grx2	protein_coding	E017	0.15955	0.402551	E019		0.721059	E006		0.961537	E009	-0.106034	0.984954																									-0.15	0.86					0.02	0.77
ENSMUSG00000018199	20822	Trove2	1810007I17Rik, A530054J02Rik, AI646302, SS-A/Ro, Ssa, Ssa2	protein_coding	E001		0.292719	E001		0.756078	E010		0.735815	E001		0.905519															0.23	1.28
ENSMUSG00000018209	58231	Stk4	AI447339, AU020804, Kas-2, Mst1, Ysk3	protein_coding	E007	-0.211603	0.553122	E011	0.122413	0.594095	E007	-0.234926	0.494664	E007	-0.126944	0.919698
ENSMUSG00000018211	192201	Wfdc15b	9230106L14Rik, SWAM1, Wfdc15	protein_coding
ENSMUSG00000018217	18858	Pmp22	22kDa, Gas-3, HNPP, Tr, trembler	protein_coding	E010	0.626614	0.54456	E010		0.798022	E011		0.791097	E010		0.736414
ENSMUSG00000018238	14566	Gdf9	Gdf-9	protein_coding	E008		0.803025
ENSMUSG00000018239	67966	Zcchc10	2410141K03Rik, AA675321, D11Ertd416e	protein_coding	E001		0.380199	E006		0.955195	E006		0.930608	E006		0.965127	0.12	0.51					0.12	0.49
ENSMUSG00000018259	13529	Prl8a2	D/tPRP, DPRP, Dtprp, mdPRP	protein_coding
ENSMUSG00000018263	21388	Tbx5		protein_coding
ENSMUSG00000018286	19175	Psmb6	Lmp19, Mpnd	protein_coding	E002	-0.0581818	0.786854	E003	-0.0987957	0.234328	E005	-0.0975145	0.970699	E002	-0.0859494	0.287113
ENSMUSG00000018287	216873	Spag7	5730443G10, ACRP, FSA-1, Fsa1l	protein_coding	E016	0.816756	0.0953468	E008	0.100831	0.947535	E007		0.996885	E005	-0.0999518	0.848148											0.01	0.14																					-0.01
ENSMUSG00000018293	18643	Pfn1	Pfn	protein_coding	E007	-0.227029	0.0429005	E006	0.0091341	0.668561	E007	-0.091414	0.964883	E007	-0.123937	0.863477
ENSMUSG00000018322	67145	Tomm34	2610100K07Rik, TOM34, Tomm34a, Tomm34b	protein_coding	E008	0.3625	0.237532	E008	0.393604	0.389206	E008	0.347345	0.695556	E008	0.284239	0.692892	-0.03	0.24					0.01	0.07
ENSMUSG00000018326	54401	Ywhab	1300003C17Rik	protein_coding	E007	0.0425356	0.0852104	E007	0.0262943	0.961542	E005	-0.0340829	0.999975	E007	0.0191627	0.947681
ENSMUSG00000018334	16706	Ksr1	AW492498, B-KSR1, D11Bhm183e, D11Bhm184e, hb, Ksr, RSU2	protein_coding	E008	0.378079	0.346716	E008		0.829669	E003		0.695363	E008		0.686956	0	0.13																							0.21	1.59
ENSMUSG00000018339		Gpx3	AA960521, EGPx, GPx, GSHPx-3, GSHPx-P	protein_coding	E006		0.399714	E007		0.941588	E008		0.998162	E011		0.913973					-0.06	0.34
ENSMUSG00000018340	11749	Anxa6	Anx6, AnxVI, AW107198, Cabm, Camb	protein_coding	E025	0.123312	0.487279	E018	0.159069	0.721572	E002	0.103168	0.625255	E002	0.0954532	0.786898
ENSMUSG00000018341	16162	Il12rb2	A930027I18Rik, Ifnm, IL-12RB2	protein_coding	E001	-0.230972	0.0726348	E003	0.202854	0.679936	E004		0.735815	E003	0.186832	0.75724
ENSMUSG00000018347	52712	Zkscan6	1700128E15Rik, D11Ertd714e, KOX11, Zfp535, Znf18	protein_coding	E005	-0.0486131	0.958017	E006		0.976977	E004		0.90728	E009		0.79916
ENSMUSG00000018362	16647	Kpna2	2410044B12Rik, IPOA1, PTAC58, Rch1	protein_coding	E001	1.05715	0.541058	E008		0.982125	E006		0.999975	E008		0.88747	0.06	0.64			0.04	0.54	0.05	0.61																									0.28
ENSMUSG00000018363	66313	Smurf2	2810411E22Rik, AI558114, AI649275	protein_coding	E026	0.486192	0.259502	E001	0.0604309	0.727671	E001	0.126133	0.377656	E017	0.139725	0.871583	0	0.03	0	0	0	0.03	0.15	1.29
ENSMUSG00000018372	320162	Ccdc45	4732496G21Rik, AI118346, AI448335, Ccdc45, D330027A14Rik, F630025I20Rik	protein_coding	E019	-0.485365	0.66499	E021		0.530876	E013		0.579429	E009		0.868271			0.01	0.07			-0.23	2.86
ENSMUSG00000018377	22344	Vezf1	AI848691, AW046909, db1	protein_coding	E008	-0.0752886	0.145625	E001	-0.251913	0.89353	E002		0.603154	E002	0.0958361	0.776031
ENSMUSG00000018378	103841	Cuedc1	AI841487, C330016O16Rik	protein_coding	ENSMUSG00000018378+ENSMUSG00000087498:E015		0.782465
ENSMUSG00000018379	110809	Srsf1	1110054N12Rik, 5730507C05Rik, 6330415C05Rik, AI482334, Asf, AW491331, Sf2, Sfrs1	protein_coding	E021	-0.32793	0.215465	E014	-0.101076	0.832758	E019	0.148002	0.100076	E010	0.0699306	0.868308	0	0	0.01	0	0	0	0	0																	0	0.02	0	0.03	0	0.03	0.01	0.03
ENSMUSG00000018381	66610	Abi3	2210414K06Rik, AI987680, NESH	protein_coding	E001		0.780925	E009		0.915718	E012		0.998241	E001		0.992037																																	-0.02
ENSMUSG00000018387	71774	Shroom1	1300007L22Rik, Apx, Shrm1	protein_coding
ENSMUSG00000018395	16568	Kif3a	111-11-71, 111-11-86, AW124694, Kif3, Kifl, Kns3	protein_coding	E035	0.334288	0.588957	E035		0.136304	E035		0.4789	E013	-0.331011	0.774496																																	-0.07
ENSMUSG00000018398	20362	Sept8	AW046166, mKIAA0202, Sepl	protein_coding	E025	-0.527889	8.04121e-06	E014	0.107198	0.779762	E013	-0.108326	0.541979	E014	0.0536751	0.985022	0.01	0.06	-0.01	0.04	0	0.03	-0.01	0.04
ENSMUSG00000018401	170749	Mtmr4	AA596759, ESTM44, FYVE-DSP2, mKIAA0647, ZFYVE11	protein_coding	E007	1.29146	0.329826	E003	0.508746	0.905111	E019		0.809075	E028	0.0815881	0.873611
ENSMUSG00000018405	217038	Mrm1	A530065E19Rik, ENSMUSG00000054212	protein_coding	E009		0.446893	E007		0.949184	E002		0.999975	E007		0.909963
ENSMUSG00000018411	17762	Mapt	AI413597, AW045860, Mtapt, Tau	protein_coding
ENSMUSG00000018412	76719	Kansl1	1700081L11Rik, 9430041J06Rik, mKIAA1267	protein_coding	E010	0.180191	0.242971	E022	-0.492719	0.777621	E015	-0.093473	0.966708	E005	-0.135	0.567321	0.09	1.7	0.11	1.42
ENSMUSG00000018415	66771	Gid4	4933439F18Rik	protein_coding	E005	0.234427	0.621435	E005	0.279288	0.757557	E004		0.868504	E003	0.154218	0.945018
ENSMUSG00000018417	17912	Myo1b	AA406997, myosin-1b	protein_coding
ENSMUSG00000018425	67487	Dhx40	2410016C14Rik, ARG147, DDX40, PAD	protein_coding	E012	0.242142	0.0497151	E012	0.198777	0.287578	E012	0.205699	0.408068	E012	0.178479	0.463649	0	0.03	0	0.03	0	0	0	0																	0	0	0	0	0	0	0	0
ENSMUSG00000018427	77864	Ypel2	6430570G24, E130113K08Rik	protein_coding	E003		0.871612	E005		0.677039	E003		0.95795	E004	0.0580831	0.992037
ENSMUSG00000018428	11640	Akap1	Akap, AKAP121, AKAP84, C76494, C81186, DAKAP1, S-AKAP84	protein_coding	E014		0.501573	E011		0.620937	E017		0.857256	E010		0.763021	0.17	0.63	0.04	0.99	0.17	1.04	-0.09	1.06
ENSMUSG00000018433	68979	Nol11	1500002M01Rik, AU015220, AU019874	protein_coding	E024	-0.310223	0.193054	E006	0.280533	0.633117	E005		0.59278	E005	0.299142	0.306474
ENSMUSG00000018442	116891	Derl2	BC005682, CGI-101, Derlin-2, F-lana, Flana, RP23-83I13.8	protein_coding	E002	-0.166328	0.0990293	E002	0.0877903	0.82013	E017	0.376432	0.766919	E013	-0.57822	0.360555					0.17	1.36			0.17	121.64			0.08	0.39
ENSMUSG00000018446	12261	C1qbp	AA407365, AA986492, D11Wsu182e, gC1qBP, HABP1, P32	protein_coding	E002	0.0339779	0.757944	E008	0.0642577	0.958784	E008		0.9775	E002	-0.0430696	0.926953
ENSMUSG00000018449	69723	Rpain	2400006N03Rik, Rip, RP23-83I13.5	protein_coding	E015	-0.235795	0.530593	E013	0.162421	0.825527	E023		0.818269	E015	-0.165004	0.903404					0.06	0.21																											-0.01
ENSMUSG00000018451		6330403K07Rik		lincRNA
ENSMUSG00000018459	114644	Slc13a3	NaDC-3, NaDC3, SDCT2	protein_coding	E008		0.155607	E002		0.999699
ENSMUSG00000018470	16499	Kcnab3	C330022D06Rik, Kcnab4, mKv(beta)4	protein_coding	E017		0.987832
ENSMUSG00000018474	216848	Chd3	2600010P09Rik, AF020312, Chd7, Prp7, Prp9-1	protein_coding	E053	-0.387028	0.248562	E002	-0.190297	0.5957	E033	-0.170201	0.743724	E020	-0.234613	0.698318																																	-0.25
ENSMUSG00000018476	216850	Kdm6b	1700064E03Rik, BC038313, Jmjd3, mKIAA0346	protein_coding	E002	0.212843	0.70835	E016	-0.158406	0.663118	E023		0.565697	E016	-0.163034	0.765922
ENSMUSG00000018479	73634	1700125H20Rik		protein_coding
ENSMUSG00000018481	66884	Appbp2	1300003O07Rik, AI465480, PAT1	protein_coding	E007	0.25054	0.269223	E010	-0.190098	0.698252	E003		0.768934	E009	-0.140857	0.905014
ENSMUSG00000018486	22412	Wnt9b	clf, clf1, wnt-14b, wnt-15, Wnt14b, Wnt15	protein_coding
ENSMUSG00000018500	11541	Adora2b	A2b, A2BAR, A2BR, AA2BR, AI480866, AI605384	protein_coding	E002	0.0517112	0.866157	E002		0.874331	E002		0.998753	E002		0.958522
ENSMUSG00000018501	20185	Ncor1	5730405M06Rik, A230020K14Rik, mKIAA1047, N-CoR, RIP13, Rxrip13	protein_coding	E074	-0.30049	0.242684	E020	0.107699	0.816252	E022	0.159679	0.3179	E065	0.300064	0.401621																									0.02	0.12			0.09	0.79			-0.11
ENSMUSG00000018507	22368	Trpv2	GRC, OTRPC2, VRL-1, Vrl1	protein_coding	E002	-0.42435	0.712466	E013	-0.0377215	0.710296	E019	0.0855304	0.442321	E016	-0.0612838	0.48485			-0.01	0
ENSMUSG00000018509	73139	Cenpv	3110013H01Rik, AA671303, Prr6	protein_coding	E011	-4.63482	0.300488	E003		0.875081	E012		0.932959	E016		0.917999	0.11	0.56			-0.09	0.35
ENSMUSG00000018537	22658	Pcgf2	mel-18, Mel18, Rnf110, Zfp144	protein_coding	E010		0.582685	E017		0.935249	E003		0.708626	E007		0.990541	0.36	3.05	-0.2	0.72	0.31	1.4	-0.09	0.42
ENSMUSG00000018541	67480	Cwc25	1300013D05Rik, AA473636, Ccdc49, R75228	protein_coding	E002	-0.0948918	0.284228	E005	0.195069	0.78739	E015		0.93517	E002	-0.126037	0.0989516
ENSMUSG00000018543	72215	1700001P01Rik		protein_coding
ENSMUSG00000018547	108083	Pip4k2b	AI848124, c11, PI5P4Kbeta, Pip5k2b	protein_coding	E006	0.21509	0.360056	E001	0.0294238	0.975061	E001	0.0510579	0.751436	E006	0.193073	0.685198
ENSMUSG00000018548	68729	Trim37	1110032A10Rik, 2810004E07Rik, AI848587, AU043018, mKIAA0898, MUL, TEF3	protein_coding	E023	0.202722	0.530256	E024	0.199325	0.78429	E017		0.476187	E023	0.166094	0.739279
ENSMUSG00000018554	53422	Ybx2	Msy2	protein_coding	E009		0.30098
ENSMUSG00000018559	67181	Ctdnep1	2610507E10Rik, Dullard	protein_coding	E017	-0.166076	0.755836	E006	0.0824183	0.822453	E004	0.168532	0.972151	E003	-0.121001	0.712977													-0.01	0.04
ENSMUSG00000018565	54351	Elp5	Derp6, Rai12	protein_coding	E011	-0.130466	0.291261	E010	-0.149794	0.555766	E010		0.890328	E010	-0.0818466	0.928241									-0.01	0.09																							0.01
ENSMUSG00000018566	20528	Slc2a4	Glut-4, Glut4	protein_coding	E002		0.0794219
ENSMUSG00000018567	56486	Gabarap		protein_coding	E001	0.301764	0.0498408	E004	0.586227	0.886808	E003	0.0561197	0.406783	E006	0.23121	0.853182									0	0	0	0	0	0	0	0																	0
ENSMUSG00000018569	53624	Cldn7		protein_coding	E005		0.565597
ENSMUSG00000018570	70419	2810408A11Rik	1700019L01Rik, 4930470J18Rik, RP23-172M21.16	protein_coding	E016		0.653749	E013		0.999699	E014		0.999975																						0.27	1.48			0.23	1.05			0	0.39			0.43	4.57	-0.09
ENSMUSG00000018572	78246	Phf23	2410141M05Rik, JUNE-1, RP23-172M21.13	protein_coding	E014	-0.365504	0.33504	E002	0.295515	0.917358	E022	-0.100556	0.86449	E015	-0.115878	0.602973
ENSMUSG00000018574	11370	Acadvl	vlcad	protein_coding	E026	0.0971344	0.713931	E026	0.156216	0.663542	E026	0.122169	0.822299	E026	0.102236	0.892548	0	0	0.01	0.03	0	0	0	0
ENSMUSG00000018581	13411	Dnahc11	b2b1203Clo, b2b1279Clo, b2b1289Clo, b2b1727Clo, b2b598Clo, Dnahc11, iv, lrd	protein_coding	E071	1.11885	0.209888	E072	-1.15074	0.253803	E004		0.836979	E017	0.619317	0.389441															0.25	0.96
ENSMUSG00000018583	27041	G3bp1	AI849976, B430204O07, C87777, G3bp, mKIAA4115	protein_coding	E004	1.04156	0.0855031	E004	0.598156	0.746282	E010	0.0608184	0.917828	E010	0.0481334	0.949039	0.01	0	0.01	0	0	0	0	0
ENSMUSG00000018585	11927	Atox1	AI256639, Atx1	protein_coding	E002	0.0538447	0.711203	E001	-0.481168	0.911074	E002	0.0459042	0.930608	E004	-0.0286235	0.888507	0	0	0	0	0	0	0	0
ENSMUSG00000018589	237213	Glra2		protein_coding
ENSMUSG00000018593	20692	Sparc	AA517111, BM-40	protein_coding
ENSMUSG00000018595	14657	Glra4		protein_coding
ENSMUSG00000018599	237781	Smcr7	AI482195, Gm11	protein_coding	E006		0.708	E007		0.832235	E007		0.72701	E009		0.524827															0.35	26.48
ENSMUSG00000018604	21386	Tbx3	D5Ertd189e	protein_coding
ENSMUSG00000018620	30800	Mmp20		protein_coding
ENSMUSG00000018623	17393	Mmp7	MAT	protein_coding
ENSMUSG00000018634	12921	Crhr1	CRFR1, Crhr	protein_coding
ENSMUSG00000018648	56405	Dusp14	1110014C10Rik, 2310042C07Rik, D11Ertd395e, MKP-L, Mkp6	protein_coding
ENSMUSG00000018651	217031	Tada2a	AV319371, D030022J10Rik, Tada2l	protein_coding	E004		0.367488	E004		0.575446	E019		0.925436	E019		0.807871																									0	0.27	-0.04	0.25			0.04	0.38
ENSMUSG00000018654	22778	Ikzf1	5832432G11Rik, hlk-1, Ikaros, LyF-1, mKIAA4227, Zfpn1a1, Znfn1a1	protein_coding	E006	-0.128661	0.696544	E005	-0.126211	0.807973	E008	0.133619	0.724525	E009	0.122963	0.434114	-0.04	0.82	0.04	0.26	0.04	0.22	-0.01	0									-0.01	0.09
ENSMUSG00000018656	403088	Fam115e	Eapa2	protein_coding
ENSMUSG00000018659	103711	Pnpo	AI415282	protein_coding	E009	0.116418	0.623833	E011	-0.307187	0.918375	E009		0.999975	E009	0.11525	0.8207
ENSMUSG00000018661	16834; 100504959	Cog1	6030445I15, Ldlb, mKIAA1381	protein_coding	E003	0.209515	0.272798	E011	0.204755	0.798887	E021		0.836361	E003	0.188047	0.411318	0.25	45943.6
ENSMUSG00000018666	12412	Cbx1	Cbx, Cbx-rs2, E430007M08Rik, HP1B, Hp1beta, M31, MOD1	protein_coding	E013	-0.101982	0.385886	E011	0.800834	0.00548409	E011		0.902749	E011	0.443991	0.55588	0	0	0.01	0.05	0.02	0.08	0	0.03																			-0.14	1.68
ENSMUSG00000018669	80280	Cdk5rap3	1810007E24Rik, BC002318, C53, C81486, HSF-27, IC53, MST016	protein_coding	E021	-0.775688	0.107146	E002	0.117955	0.818873	E002		0.345289	E017	-0.197058	0.739195					0.03	0.1																					-0.05	0.22
ENSMUSG00000018672	56358	Copz2	1110012D12Rik, zeta2-COP	protein_coding	E017		0.756599	E015		0.913474	E015		0.984323	E015		0.999937
ENSMUSG00000018677	68066	Slc25a39	3010027G13Rik, D11Ertd333e	protein_coding	E017	-1.7025	0.244851	E014	0.0998823	0.757816	E010	0.171283	0.431719	E024	-0.0878575	0.74133	0	0	0	0	0.01	0	0	0																									0
ENSMUSG00000018678	78912	Sp2	4930480I16Rik, mKIAA0048	protein_coding	E009	-0.159505	0.845258	E004	0.11318	0.899519	E003		0.794504	E008	0.0539965	0.887561
ENSMUSG00000018697	56321	Aatf	4933415H02Rik, 5830465M17Rik, Che-1, Trb	protein_coding	E002	-0.277337	0.0837774	E004	-0.290794	0.344025	E002		0.574423	E004	-0.354938	0.0417398
ENSMUSG00000018698	16869	Lhx1	Lim1	protein_coding
ENSMUSG00000018707	13424	Dync1h1	9930018I23Rik, AI894280, DHC1, DHC1a, Dnchc1, DNCL, Dnec1, Dnecl, Loa, MAP1C, mKIAA0325, P22, Swl	protein_coding	E035	0.126601	0.213964	E044	-0.144909	0.235371	E092	0.145384	0.306832	E082	0.123757	0.201239
ENSMUSG00000018727	52670	Cpsf4l	0610010C04Rik, 1500000C01Rik, D11Ertd636e	protein_coding	E007		0.466557	E007		0.960129									0.26	1.11	0.15	1.56
ENSMUSG00000018733	103737	Pex12	AI451906	protein_coding	E016		0.931808	E005		0.849499	E004		0.933405	E013		0.948629
ENSMUSG00000018736	83431	Ndel1	2600006O07Rik, MITAP1, mNudel, NUDEL	protein_coding	E010	-0.150535	0.343238	E010	-0.152465	0.439684	E011	-0.206567	0.427688	E007	0.0766214	0.841577							0.03	0.14
ENSMUSG00000018740	71998	Slc25a35	1810012H11Rik	protein_coding	E010		0.662235	E009		0.917358	E011		0.990471	E005		0.885966
ENSMUSG00000018750	75580	Zbtb4	2310026P19Rik, 9230111I22Rik, mKIAA1538, RP23-422L16.16	protein_coding	E009	-0.165388	0.395968	E023	-0.161586	0.776558	E023	-0.221595	0.24143	E023	-0.125678	0.804349							0.05	0.27
ENSMUSG00000018752	619441	BC096441	Tnfsf12-Tnfsf13, Twe-pril	protein_coding	ENSMUSG00000097328+ENSMUSG00000089669+ENSMUSG00000018752:E013	0.10593	0.175261	ENSMUSG00000097328+ENSMUSG00000089669+ENSMUSG00000018752:E015	-0.145843	0.0010028	ENSMUSG00000097328+ENSMUSG00000089669+ENSMUSG00000018752:E013	0.0770883	0.836361	ENSMUSG00000097328+ENSMUSG00000089669+ENSMUSG00000018752:E011	-0.131967	0.626307	0	0	0	0	0	0	0	0
ENSMUSG00000018761	24070	Mpdu1	LEC35, SL15, Supl15h	protein_coding	E019	0.10292	0.504124	E006	-0.10111	0.832566	E002	0.201206	0.531138	E010	0.108956	0.882667	0.17	4.39	0	0.05	-0.01	0.03	0.15	2.41																									0.08
[truncated: 36,127 more rows]
[truncated: 66 more columns]

## Sheet: Key
MISO	SE	Skipped exons
MISO	RI	Retained introns
MISO	MXE	Mutually exclusive exons
MISO	A5SS	Alternative 5' splice site
MISO	A3SS	Alternative 3' splice site
CUFFDIF	CDS	Differential coding output
CUFFDIF	SPLICING	Differential splicing
CUFFDIF	PROMOTERS	Differential promoter use
CUFFDIF	CDS_EXP	Coding sequence differential expression
CUFFDIF	ISOFORM_EXP	Transcript-level differential expression
CUFFDIF	GENE_EXP	Gene-level differential expression
CUFFDIF	TSS_GROUP_EXP	Primary transcript differential expression
